# Supplementary material for: Hypervalent iodine(iii) promoted tandem reaction of o-fluoroanilines with formamides to construct 2-aminobenzoxazoles
Source: Royal Society of Chemistry journal article supplement (doi:10.1039/d2qo00049k), 2022-01-01
Supplement: d2qo00049k1.pdf [file d2qo00049k1.pdf]

# Hypervalent Iodine(III) Promoted Tandem Reaction of *o*-Fluoroanilines with Formamides to Construct 2-Aminobenzoxazoles

Lipeng Long,\* Jieyan Wang, Xin Li, ShunFeng Peng, Liang Qiao, Guotian Luo,  
Zhengwang Chen\*

Key Laboratory of Organo-Pharmaceutical Chemistry of Jiangxi Province, Gannan Normal University,  
Ganzhou 341000, PR China.

## Supporting Information

### List of Contents

|                                                                                                     |     |
|-----------------------------------------------------------------------------------------------------|-----|
| A. General method.....                                                                              | S2  |
| B. <sup>19</sup> F NMR Experiments .....                                                            | S2  |
| C. General procedure for the synthesis of <i>N,N</i> -dimethylbenzo[ <i>d</i> ]oxazol-2-amine ..... | S4  |
| D. Analytical data .....                                                                            | S5  |
| E. Reference.....                                                                                   | S14 |
| F. Copies of <sup>1</sup> H and <sup>13</sup> C NMR spectra.....                                    | S15 |
| G. X-ray crystallographic data .....                                                                | S54 |

## A. General method

Melting points were investigated using a melting point instrument and are uncorrected.  $^1\text{H}$  and  $^{13}\text{C}$  NMR spectra were obtained on a 400 MHz for  $^1\text{H}$  NMR and 100 MHz for  $^{13}\text{C}$  NMR. The chemical shifts are referenced to signals at 7.26 and 77.0 ppm, respectively, chloroform is solvent with TMS as the internal standard unless otherwise noted. Mass spectra were recorded on a GC-MS spectrometer at an ionization voltage of 70 eV equipped with a DB-WAX capillary column (internal diameter: 0.25 mm, length: 30 m). High resolution mass spectra (HRMS) (TOF) were measured using an electrospray ionization (ESI) mass spectrometry. Silica gel (300-400 mesh) was used for flash column chromatograph, eluting (unless otherwise stated) with ethyl acetate/petroleum ether (PE) (60-90 °C) mixture.

## B. $^{19}\text{F}$ NMR Experiments

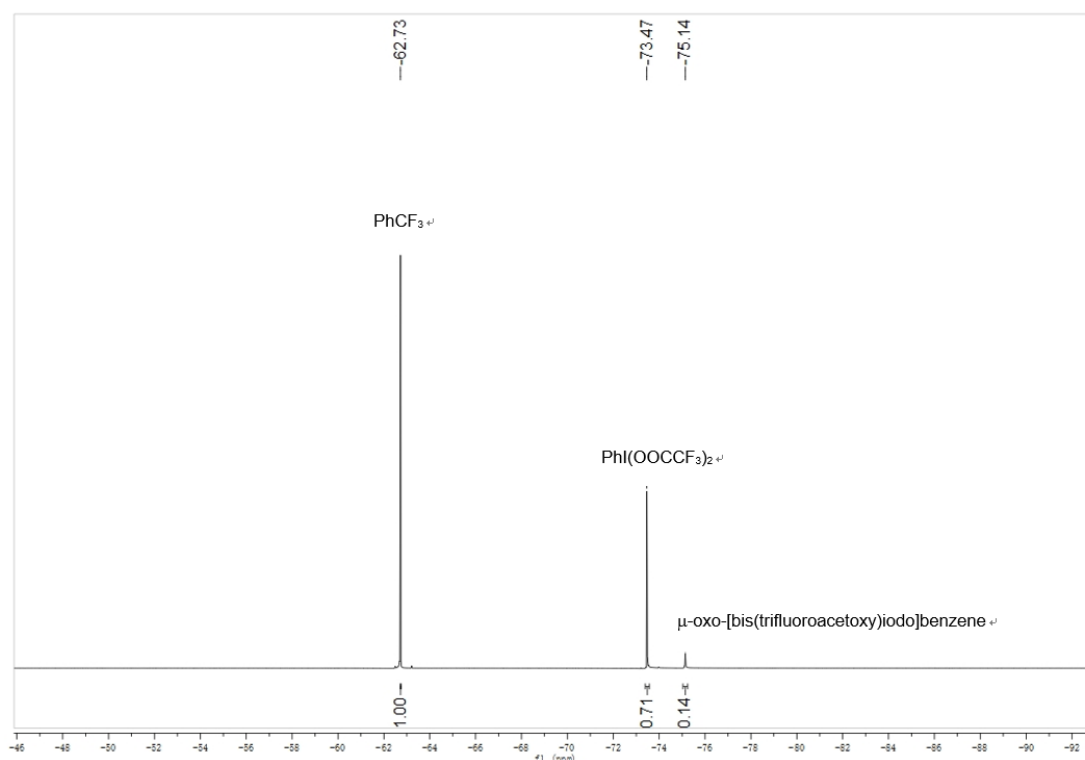

**Figure S1**  $^{19}\text{F}$  NMR (376.5 MHz) study on commercial PIFA using  $\text{C}_6\text{H}_5\text{CF}_3$  as the internal standard (0.16 M in  $\text{CDCl}_3$ ).

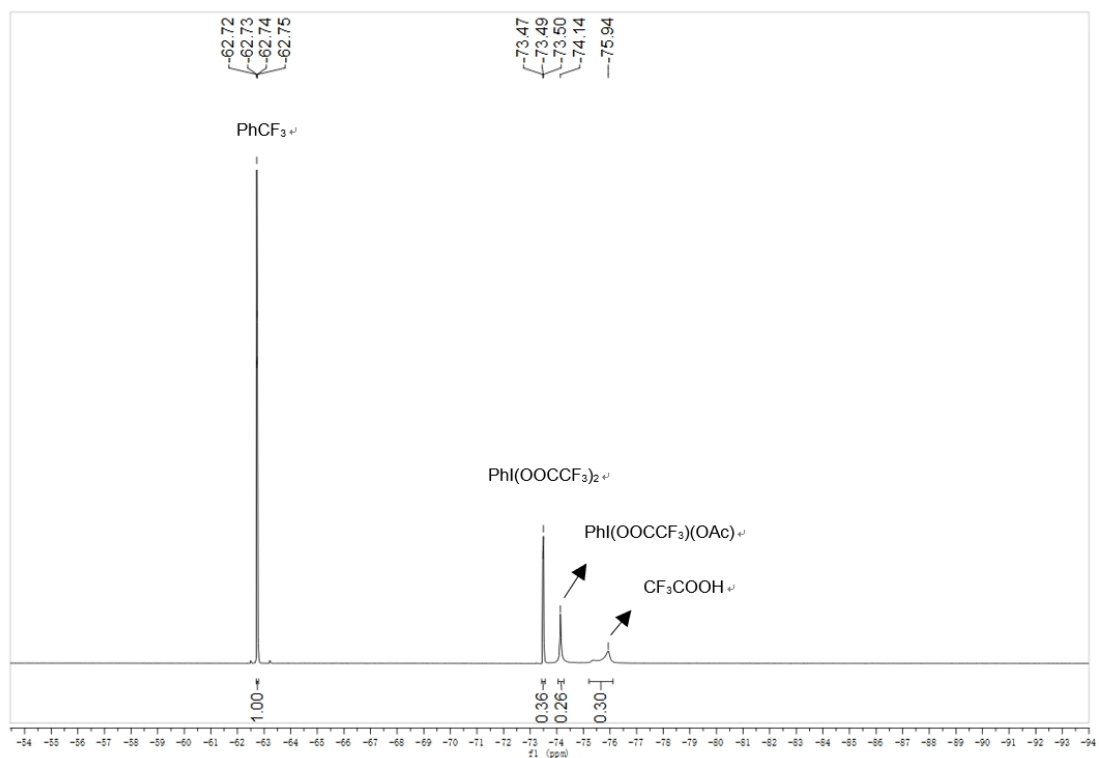

**Figure S2**  $^{19}\text{F}$  NMR (376.5 MHz) study on a mixture of commercial PIDA and 2 equiv of  $\text{CF}_3\text{COOH}$  after 16 h using  $\text{C}_6\text{H}_5\text{CF}_3$  as the internal standard (0.16 M in  $\text{CDCl}_3$ ).

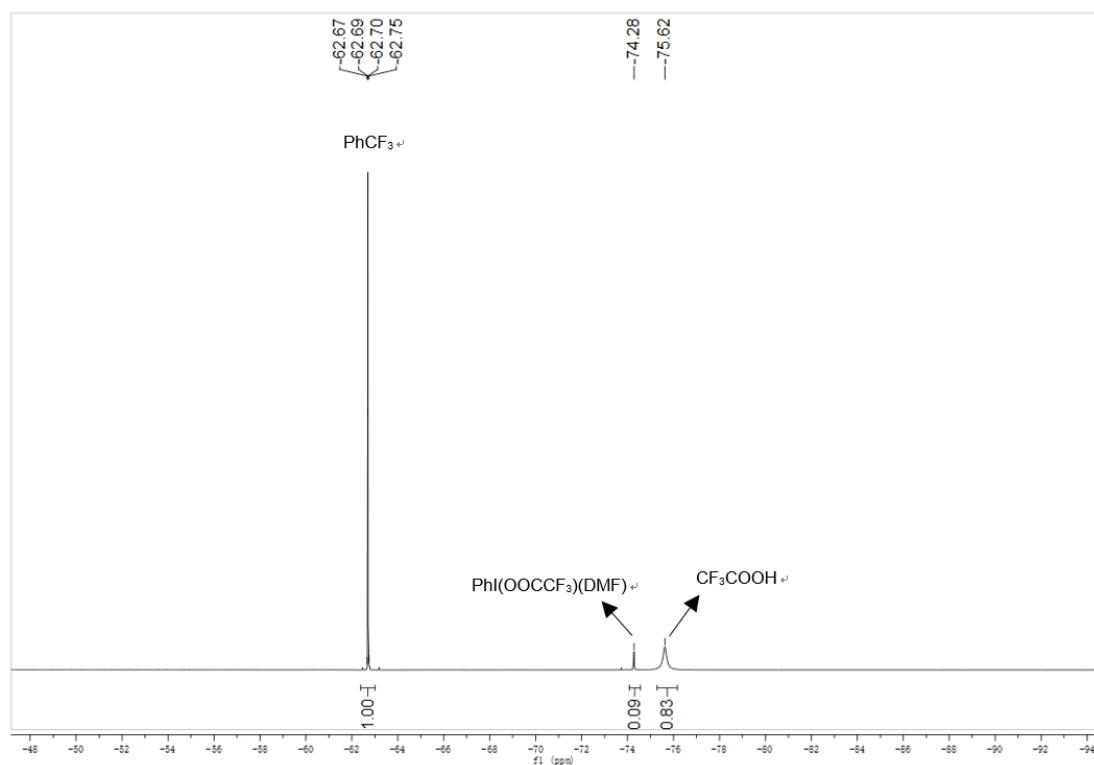

**Figure S3**  $^{19}\text{F}$  NMR (376.5 MHz) study on the experiment in Figure 2 added 40 equiv DMF using  $\text{C}_6\text{H}_5\text{CF}_3$  as the internal standard (0.16 M in  $\text{CDCl}_3$ ).

**Note:** For the commercial PIFA shown in Figure S1, the major proton signals correspond to PIFA while the minor signals correspond to  $\mu$ -oxo-[bis(trifluoroacetoxy)iodo]benzene, which could be formed via the decomposition of PIFA. As showed in Figure S2, upon the addition of  $\text{CF}_3\text{COOH}$  in the solution of  $\text{PhI}(\text{OAc})_2$  after 16 h, the signal of  $\text{CF}_3\text{COOH}$  (-75.94 ppm in  $^{19}\text{F}$  NMR) diminished and the signal of PIFA (-73.49 ppm in  $^{19}\text{F}$  NMR), the signal of  $\text{PhI}(\text{OOCF}_3)(\text{OAc})$  (-74.14 ppm in  $^{19}\text{F}$  NMR) emerged, which correspond to transesterification of PIFA with trifluoroacetic acid and intermediate A and B generated. When 40 equiv DMF was added to the mixture of PIFA and  $\text{CF}_3\text{COOH}$ , as showed in Figure S3, the signal of PIFA was disappeared, and the content of hypervalent iodine with one  $\text{CF}_3\text{COO}$  ligand was reduced from 0.26 to 0.09 (with the ratio of external standard  $\text{PhCF}_3$ ). However, the content of trifluoroacetic acid increased from 0.3 to 0.89. These  $^{19}\text{F}$  NMR experiments indicate that DMF substituted trifluoroacetic acid and coordinated with hypervalent iodine.

### **C. General procedure for the synthesis of *N,N*-dimethylbenzo[*d*]oxazol-2-amine**

To a suspension of arylamine (0.2 mmol) and DMF (8.0 mmol) in DCM (1.0 mL)  $\text{PhI}(\text{OAc})_2$  (0.2 mmol) was added, followed by  $\text{CF}_3\text{COOH}$  (0.4 mmol). The mixture was stirred in the air at room temperature for 8 h. After the reaction was finished, ethyl acetate (5mL) was added. Washed with saturated  $\text{NaHCO}_3$  solution ( $3 \times 5$  ml), then the aqueous layers were extracted with ethyl acetate ( $3 \times 5$  ml). The organic layer was dried by  $\text{Na}_2\text{SO}_4$  and concentrated under reduced pressure. The residue was separated by column chromatography to obtain pure sample.

**Note:** Reaction quenching must be performed in a well-ventilated fume hood wearing appropriate protective equipment.

## D. Analytical data

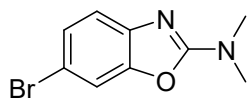

### 6-bromo-*N,N*-dimethylbenzo[*d*]oxazol-2-amine (3a)<sup>1</sup>

The title compound was achieved as a beige solid, 41.3 mg, 86% yield; m.p. 95-96 °C;  $R_f = 0.57$  (petroleum ether / ethyl acetate = 3:1); <sup>1</sup>H NMR (400 MHz, CDCl<sub>3</sub>)  $\delta = 7.32$  (d,  $J = 1.8$  Hz, 1H), 7.21 (dd,  $J = 8.3, 1.8$  Hz, 1H), 7.13 (d,  $J = 8.3$  Hz, 1H), 3.12 (s, 6H). <sup>13</sup>C NMR (100 MHz, CDCl<sub>3</sub>)  $\delta = 163.2, 149.5, 143.0, 126.9, 116.8, 112.1, 112.0, 37.6$ .

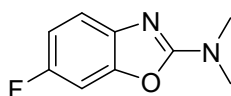

### 6-fluoro-*N,N*-dimethylbenzo[*d*]oxazol-2-amine (3b)

The title compound was achieved as a white solid, 23.0 mg, 64% yield; m.p. 84-85 °C;  $R_f = 0.50$  (petroleum ether / ethyl acetate = 3:1); <sup>1</sup>H NMR (400 MHz, CDCl<sub>3</sub>)  $\delta = 7.22$  (dd,  $J = 8.6, 4.8$  Hz, 1H), 7.00 (dd,  $J = 8.1, 2.5$  Hz, 1H), 6.88 (ddd,  $J = 9.9, 8.6, 2.5$  Hz, 1H), 3.17 (s, 6H). <sup>13</sup>C NMR (100 MHz, CDCl<sub>3</sub>)  $\delta = 163.4, 157.7$  (d,  $J = 240.1$  Hz), 148.7 (d,  $J = 14.4$  Hz), 139.6, 115.5 (d,  $J = 9.5$  Hz), 110.6 (d,  $J = 23.0$  Hz), 97.5 (d,  $J = 29.0$  Hz), 37.7. HRMS (ESI):  $m/z$  calcd. for C<sub>9</sub>H<sub>10</sub>FN<sub>2</sub>O [M + H]<sup>+</sup>: 181.0772, found: 181.0777.

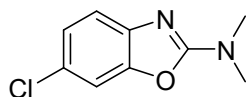

### 6-chloro-*N,N*-dimethylbenzo[*d*]oxazol-2-amine (3c)<sup>1, 2</sup>

The title compound was achieved as a yellow solid, 28.2 mg, 72% yield; m.p. 101-102 °C;  $R_f = 0.48$  (petroleum ether / ethyl acetate = 3:1); <sup>1</sup>H NMR (400 MHz, CDCl<sub>3</sub>)  $\delta = 7.23$  (d,  $J = 2.0$  Hz, 1H), 7.21 (d,  $J = 8.4$  Hz, 1H), 7.11 (dd,  $J = 8.4, 2.0$  Hz, 1H), 3.17 (s, 6H). <sup>13</sup>C NMR (100 MHz, CDCl<sub>3</sub>)  $\delta = 163.3, 149.2, 142.4, 125.2, 124.1, 116.2, 109.4, 37.7$ . HRMS (ESI):  $m/z$  calcd. for C<sub>9</sub>H<sub>10</sub>ClN<sub>2</sub>O [M + H]<sup>+</sup>: 197.0476, found: 197.0482.

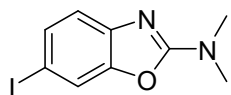

### 6-iodo-*N,N*-dimethylbenzo[*d*]oxazol-2-amine (3d)

The title compound was achieved as a fuchsia solid, 43.4 mg, 75% yield; m.p. 122-123 °C;  $R_f = 0.19$  (petroleum ether / ethyl acetate = 5:1); <sup>1</sup>H NMR (400 MHz, CDCl<sub>3</sub>)  $\delta = 7.54$  (d,  $J = 1.6$  Hz, 1H), 7.43 (dd,  $J = 8.2, 1.6$  Hz, 1H), 7.08 (d,  $J = 8.2$  Hz, 1H), 3.17 (s, 6H). <sup>13</sup>C NMR (100 MHz, CDCl<sub>3</sub>)  $\delta = 162.9, 149.8, 143.7, 132.9, 117.6, 81.1, 37.7$ . HRMS (ESI):  $m/z$  calcd. for C<sub>9</sub>H<sub>10</sub>IN<sub>2</sub>O [M + H]<sup>+</sup>: 288.9832, found: 288.9840.

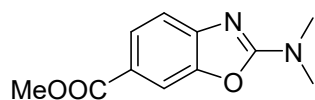

### 2-(dimethylamino)benzo[d]oxazol-6-yl acetate (3e)

The title compound was achieved as an orange solid, 18.5 mg, 42% yield; m.p. 115-116 °C;  $R_f = 0.32$  (petroleum ether / ethyl acetate = 3:1);  $^1\text{H NMR}$  (400 MHz,  $\text{CDCl}_3$ )  $\delta = 7.92$  (dd,  $J = 7.9, 1.3$  Hz, 2H), 7.32 (dd,  $J = 7.7, 1.1$  Hz, 1H), 3.90 (s, 3H), 3.24 (s, 6H).  $^{13}\text{C NMR}$  (100 MHz,  $\text{CDCl}_3$ )  $\delta = 167.1, 164.5, 148.7, 148.1, 126.7, 122.2, 115.1, 110.0, 52.0, 37.7$ . HRMS (ESI):  $m/z$  calcd. for  $\text{C}_{11}\text{H}_{13}\text{N}_2\text{O}_3$   $[\text{M} + \text{H}]^+$ : 221.0921, found: 221.0928.

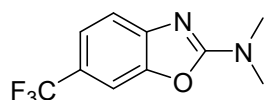

### *N,N*-dimethyl-6-(trifluoromethyl)benzo[d]oxazol-2-amine (3f)

The title compound was achieved as a yellow solid, 23.1 mg, 50% yield; m.p. 114-115 °C;  $R_f = 0.22$  (petroleum ether / ethyl acetate = 5:1);  $^1\text{H NMR}$  (400 MHz,  $\text{CDCl}_3$ )  $\delta = 7.49$  (s, 1H), 7.44 (dd,  $J = 8.2, 0.9$  Hz, 1H), 7.37 (d,  $J = 8.2$  Hz, 1H), 3.24 (s, 6H).  $^{13}\text{C NMR}$  (100 MHz,  $\text{CDCl}_3$ )  $\delta = 164.2, 148.5, 146.6, 124.6$  (q,  $J_1 = 271.2$  Hz), 122.4 (q,  $J_2 = 32.9$  Hz), 115.61 (s, 4H), 106.1 (q,  $J_3 = 3.8$  Hz), 37.7. HRMS (ESI):  $m/z$  calcd. for  $\text{C}_{10}\text{H}_{10}\text{F}_3\text{N}_2\text{O}$   $[\text{M} + \text{H}]^+$ : 231.0740, found: 231.0733.

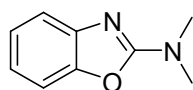

### *N,N*-dimethylbenzo[d]oxazol-2-amine (3g)<sup>1,2</sup>

The title compound was achieved as a brown solid, 19.8 mg, 61% yield; m.p. 87-88 °C;  $R_f = 0.51$  (petroleum ether / ethyl acetate = 3:1);  $^1\text{H NMR}$  (400 MHz,  $\text{CDCl}_3$ )  $\delta = 7.34$  (dd,  $J = 7.8, 0.6$  Hz, 1H), 7.23 (dd,  $J = 7.9, 0.4$  Hz, 1H), 7.14 (td,  $J = 7.7, 1.1$  Hz, 1H), 6.98 (td,  $J = 7.8, 1.2$  Hz, 1H), 3.18 (s, 6H).  $^{13}\text{C NMR}$  (100 MHz,  $\text{CDCl}_3$ )  $\delta = 163.1, 149.1, 143.5, 123.9, 120.2, 116.0, 108.6, 37.7$ .

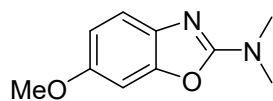

### 6-methoxy-*N,N*-dimethylbenzo[d]oxazol-2-amine (3h)

The title compound was achieved as an orange solid, 34.2 mg, 89% yield; m.p. 94-95 °C;  $R_f = 0.38$  (petroleum ether / ethyl acetate = 3:1);  $^1\text{H NMR}$  (400 MHz,  $\text{CDCl}_3$ )  $\delta = 7.22$  (d,  $J = 8.6$  Hz, 1H), 6.88 (d,  $J = 2.4$  Hz, 1H), 6.76 – 6.73 (m, 1H), 3.80 (s, 3H), 3.17 (s, 6H).  $^{13}\text{C NMR}$  (101 MHz,  $\text{CDCl}_3$ )  $\delta = 162.8, 154.8, 149.5, 136.9, 115.6, 110.0, 96.0, 56.1, 37.8$ . HRMS (ESI):  $m/z$  calcd. for  $\text{C}_{10}\text{H}_{13}\text{N}_2\text{O}_2$   $[\text{M} + \text{H}]^+$ : 193.0972, found: 193.0966.

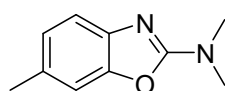

### *N,N*,6-trimethylbenzo[d]oxazol-2-amine (3i)<sup>2</sup>

The title compound was achieved as a orange solid, 30.6 mg, 87% yield; m.p. 57-58 °C;  $R_f = 0.49$  (petroleum ether / ethyl acetate = 3:1);  $^1\text{H NMR}$  (400 MHz,  $\text{CDCl}_3$ )  $\delta = 7.20$  (d,  $J = 7.9$  Hz, 1H), 7.05 – 7.02 (m, 1H), 6.93 (ddd,  $J = 7.9, 1.5, 0.6$  Hz, 1H), 3.14 (s, 6H), 2.37 (s, 3H).  $^{13}\text{C NMR}$  (100 MHz,  $\text{CDCl}_3$ )  $\delta = 162.9, 149.3, 141.1, 130.1, 124.5, 115.4, 109.2, 37.7, 21.4$ . HRMS (ESI):  $m/z$  calcd. for  $\text{C}_{10}\text{H}_{13}\text{N}_2\text{O}$   $[\text{M} + \text{H}]^+$ : 177.1022, found: 177.1021.

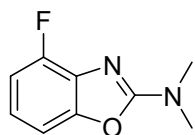

#### 4-fluoro-*N,N*-dimethylbenzo[*d*]oxazol-2-amine (3j)

The title compound was achieved as a yellow solid, 18.1 mg, 50% yield; m.p. 107-108 °C;  $R_f = 0.72$  (petroleum ether / ethyl acetate = 3:1);  $^1\text{H NMR}$  (400 MHz,  $\text{CDCl}_3$ )  $\delta = 7.07 - 7.03$  (m, 1H), 6.93 – 6.88 (m, 2H), 3.20 (s, 6H).  $^{13}\text{C NMR}$  (100 MHz,  $\text{CDCl}_3$ )  $\delta = 162.9, 151.3$  (d,  $J = 9.0$  Hz), 151.2 (d,  $J = 248.0$  Hz), 131.7 (d,  $J = 16.0$  Hz), 120.1 (d,  $J = 7.0$  Hz), 110.6 (d,  $J = 18.0$  Hz), 104.9 (d,  $J = 4.0$  Hz), 37.7. HRMS (ESI):  $m/z$  calcd. for  $\text{C}_9\text{H}_{10}\text{FN}_2\text{O}$   $[\text{M} + \text{H}]^+$ : 181.0772, found: 181.0777.

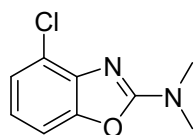

#### 4-chloro-*N,N*-dimethylbenzo[*d*]oxazol-2-amine (3k)

The title compound was achieved as a brown solid, 21.6 mg, 55% yield; m.p. 77-78 °C;  $R_f = 0.53$  (petroleum ether / ethyl acetate = 3:1);  $^1\text{H NMR}$  (400 MHz,  $\text{CDCl}_3$ )  $\delta = 7.14$  (dd,  $J = 2.5, 0.9$  Hz, 1H), 7.12 (d,  $J = 1.7$  Hz, 1H), 6.90 (t,  $J = 8.0$  Hz, 1H), 3.21 (s, 6H).  $^{13}\text{C NMR}$  (100 MHz,  $\text{CDCl}_3$ )  $\delta = 163.2, 149.5, 141.5, 124.1, 120.5, 120.0, 107.1, 37.8$ . HRMS (ESI):  $m/z$  calcd. for  $\text{C}_9\text{H}_{10}\text{ClN}_2\text{O}$   $[\text{M} + \text{H}]^+$ : 197.0476, found: 197.0483.

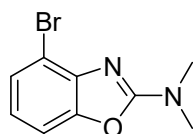

#### 4-bromo-*N,N*-dimethylbenzo[*d*]oxazol-2-amine (3l)

The title compound was achieved as a reddish-brown solid, 34.6 mg, 72% yield; m.p. 84-85 °C;  $R_f = 0.67$  (petroleum ether / ethyl acetate = 3:1);  $^1\text{H NMR}$  (400 MHz,  $\text{CDCl}_3$ )  $\delta = 7.28$  (dd,  $J = 8.1, 0.8$  Hz, 1H), 7.15 (dd,  $J = 7.9, 0.8$  Hz, 1H), 6.84 (t,  $J = 8.0$  Hz, 1H), 3.20 (s, 6H).  $^{13}\text{C NMR}$  (100 MHz,  $\text{CDCl}_3$ )  $\delta = 163.0, 148.9, 143.2, 127.0, 120.9, 108.0, 107.6, 37.8$ . HRMS (ESI):  $m/z$  calcd. for  $\text{C}_9\text{H}_{10}\text{BrN}_2\text{O}$   $[\text{M} + \text{H}]^+$ : 240.9971, found: 240.9979.

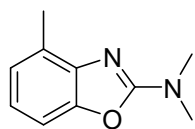

### ***N,N*,4-trimethylbenzo[*d*]oxazol-2-amine (3m)<sup>2</sup>**

The title compound was achieved as a brown solid, 18.3 mg, 52% yield; m.p. 53-54 °C;  $R_f = 0.71$  (petroleum ether / ethyl acetate = 3:1); <sup>1</sup>H NMR (400 MHz, CDCl<sub>3</sub>)  $\delta = 7.08$  (dd,  $J = 7.8, 0.6$  Hz, 1H), 6.98 – 6.94 (m, 1H), 6.89 (t,  $J = 7.7$  Hz, 1H), 3.20 (s, 6H), 2.49 (s, 3H). <sup>13</sup>C NMR (100 MHz, CDCl<sub>3</sub>)  $\delta = 162.7, 148.7, 142.5, 126.2, 124.7, 119.9, 106.0, 37.8, 16.5$ .

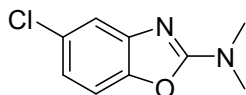

### **5-chloro-*N,N*-dimethylbenzo[*d*]oxazol-2-amine (3n)<sup>2</sup>**

The title compound was achieved as a brown solid, 29.8 mg, 76% yield; m.p. 85-86 °C;  $R_f = 0.18$  (petroleum ether / ethyl acetate = 5:1); <sup>1</sup>H NMR (400 MHz, CDCl<sub>3</sub>)  $\delta = 7.27$  (d,  $J = 2.1$  Hz, 1H), 7.10 (d,  $J = 8.4$  Hz, 1H), 6.92 (dd,  $J = 8.4, 2.1$  Hz, 1H), 3.16 (s, 6H). <sup>13</sup>C NMR (100 MHz, CDCl<sub>3</sub>)  $\delta = 163.8, 147.7, 145.0, 129.2, 120.0, 116.0, 109.1, 37.6$ .

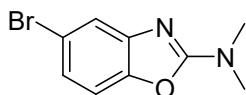

### **5-bromo-*N,N*-dimethylbenzo[*d*]oxazol-2-amine (3o)<sup>2</sup>**

The title compound was achieved as a brown solid, 38.5 mg, 80% yield; m.p. 66-67 °C;  $R_f = 0.30$  (petroleum ether / ethyl acetate = 20:1); <sup>1</sup>H NMR (400 MHz, CDCl<sub>3</sub>)  $\delta = 7.43$  (t,  $J = 1.2$  Hz, 1H), 7.07 (d,  $J = 1.2$  Hz, 2H), 3.17 (s, 6H). <sup>13</sup>C NMR (100 MHz, CDCl<sub>3</sub>)  $\delta = 163.6, 148.1, 145.5, 122.8, 119.0, 116.6, 109.6, 37.7$ .

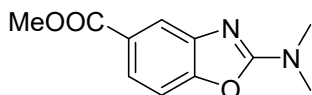

### **2-(dimethylamino)benzo[*d*]oxazol-5-yl acetate (3p)**

The title compound was achieved as an orange solid, 19.4 mg, 44% yield; m.p. 113-114 °C;  $R_f = 0.35$  (petroleum ether / ethyl acetate = 3:1); <sup>1</sup>H NMR (400 MHz, CDCl<sub>3</sub>)  $\delta = 8.02 - 7.98$  (m, 1H), 7.77 (dd,  $J = 8.4, 1.7$  Hz, 1H), 7.25 (d,  $J = 8.5$  Hz, 1H), 3.90 (s, 3H), 3.20 (s, 6H). <sup>13</sup>C NMR (100 MHz, CDCl<sub>3</sub>)  $\delta = 167.2, 163.6, 152.2, 143.7, 126.3, 122.8, 117.4, 108.2, 52.1, 37.7$ . HRMS (ESI):  $m/z$  calcd. for C<sub>11</sub>H<sub>13</sub>N<sub>2</sub>O<sub>3</sub> [M + H]<sup>+</sup>: 221.0921, found: 221.0928.

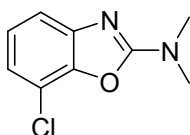

### **7-chloro-*N,N*-dimethylbenzo[*d*]oxazol-2-amine (3q)**

The title compound was achieved as a reddish-brown solid, 21.2 mg, 54% yield; m.p. 88-89 °C;  $R_f = 0.58$  (petroleum ether / ethyl acetate = 3:1); <sup>1</sup>H NMR (400 MHz, CDCl<sub>3</sub>)  $\delta = 7.22$  (dd,  $J = 7.8, 1.0$  Hz, 1H), 7.06 (dd,  $J = 8.0, 2.7$  Hz, 1H), 6.97 (dd,  $J = 8.1, 1.0$  Hz, 1H), 3.22 (s, 6H). <sup>13</sup>C NMR (100 MHz, CDCl<sub>3</sub>)  $\delta = 162.9, 145.4, 144.9, 124.7, 120.8, 114.4, 113.9, 37.8$ . HRMS (ESI):  $m/z$  calcd. for C<sub>9</sub>H<sub>10</sub>ClN<sub>2</sub>O [M + H]<sup>+</sup>: 197.0476, found: 197.0482.



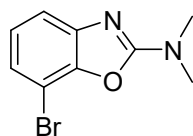

### 7-bromo-*N,N*-dimethylbenzo[*d*]oxazol-2-amine (3r)

The title compound was achieved as a reddish-brown solid, 39.4 mg, 82% yield; m.p. 96-97 °C;  $R_f = 0.49$  (petroleum ether / ethyl acetate = 5:1);  $^1\text{H NMR}$  (400 MHz,  $\text{CDCl}_3$ )  $\delta = 7.25$  (dd,  $J = 7.8, 1.1$  Hz, 1H), 7.11 (dd,  $J = 8.1, 1.1$  Hz, 1H), 7.01 (dd,  $J = 10.5, 5.3$  Hz, 1H), 3.22 (s, 6H).  $^{13}\text{C NMR}$  (100 MHz,  $\text{CDCl}_3$ )  $\delta = 162.6, 147.0, 144.4, 125.1, 123.4, 114.9, 100.6, 37.8$ . HRMS (ESI):  $m/z$  calcd. for  $\text{C}_9\text{H}_{10}\text{BrN}_2\text{O}$  [ $\text{M} + \text{H}$ ] $^+$ : 240.9971, found: 240.9963.

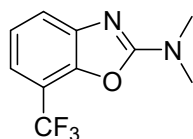

### *N,N*-dimethyl-7-(trifluoromethyl)benzo[*d*]oxazol-2-amine (3s)

The title compound was achieved as a yellow solid, 17.5 mg, 38% yield; m.p. 83-84 °C;  $R_f = 0.56$  (petroleum ether / ethyl acetate = 3:1);  $^1\text{H NMR}$  (400 MHz,  $\text{CDCl}_3$ )  $\delta = 7.49 - 7.46$  (m, 1H), 7.23 - 7.17 (m, 2H), 3.22 (s, 6H).  $^{13}\text{C NMR}$  (100 MHz,  $\text{CDCl}_3$ )  $\delta = 163.4, 145.0, 123.8, 123.1$  (q,  $J_1 = 271.1$  Hz), 119.3, 116.9 (q,  $J_3 = 4.3$  Hz), 112.7 (q,  $J_2 = 34.6$  Hz), 37.7. HRMS (ESI):  $m/z$  calcd. for  $\text{C}_{10}\text{H}_{10}\text{F}_3\text{N}_2\text{O}$  [ $\text{M} + \text{H}$ ] $^+$ : 231.0740, found: 231.0747.

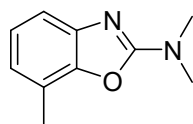

### *N,N,7*-trimethylbenzo[*d*]oxazol-2-amine (3t)<sup>2</sup>

The title compound was achieved as a reddish-brown oil, 23.9 mg, 68% yield;  $R_f = 0.6$  (petroleum ether / ethyl acetate = 3:1);  $^1\text{H NMR}$  (400 MHz,  $\text{CDCl}_3$ )  $\delta = 7.18$  (dd,  $J = 7.8, 0.5$  Hz, 1H), 7.04 (t,  $J = 7.7$  Hz, 1H), 6.80 (d,  $J = 7.5$  Hz, 1H), 3.20 (s, 6H), 2.42 (s, 3H).  $^{13}\text{C NMR}$  (100 MHz,  $\text{CDCl}_3$ )  $\delta = 162.9, 148.1, 143.1, 123.7, 121.8, 119.0, 113.5, 37.7, 14.9$ .

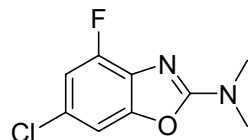

### 6-chloro-4-fluoro-*N,N*-dimethylbenzo[*d*]oxazol-2-amine (3u)

The title compound was achieved as a light brown solid, 24.8 mg, 58% yield; m.p. 99-100 °C;  $R_f = 0.24$  (petroleum ether / ethyl acetate = 5:1);  $^1\text{H NMR}$  (400 MHz,  $\text{CDCl}_3$ )  $\delta = 7.02$  (dd,  $J = 1.7, 0.7$  Hz, 1H), 6.89 (dd,  $J = 9.8, 1.8$  Hz, 1H), 3.16 (s, 6H).  $^{13}\text{C NMR}$  (100 MHz,  $\text{CDCl}_3$ )  $\delta = 163.1, 151.0$  (d,  $J = 11.0$  Hz), 150.2 (d,  $J = 252.1$  Hz), 130.8 (d,  $J = 16.1$  Hz), 124.7 (d,  $J = 9.4$  Hz), 111.8 (d,  $J = 21.7$  Hz), 106.0 (d,  $J = 5.0$  Hz), 37.7. HRMS (ESI):  $m/z$  calcd. for  $\text{C}_9\text{H}_9\text{ClFN}_2\text{O}$  [ $\text{M} + \text{H}$ ] $^+$ : 215.0382, found: 215.0389.

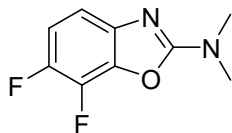

**6,7-difluoro-*N,N*-dimethylbenzo[*d*]oxazol-2-amine (3v)**

The title compound was achieved as a yellow solid, 17.0 mg, 43% yield; m.p. 86-87 °C;  $R_f = 0.50$  (petroleum ether / ethyl acetate = 3:1);  $^1\text{H NMR}$  (400 MHz,  $\text{CDCl}_3$ )  $\delta = 7.00 - 6.93$  (m, 2H), 3.21 (d,  $J = 0.5$  Hz, 6H).  $^{13}\text{C NMR}$  (100 MHz,  $\text{CDCl}_3$ )  $\delta = 163.43$  (s), 145.9 (dd,  $J_1 = 239.1$ ,  $J_2 = 10.1$  Hz), 141.74 (s, 4H), 135.9 (dd,  $J = 6.1$ ,  $J = 5.9$  Hz), 135.5 (dd,  $J_1 = 251.1$ ,  $J_2 = 18.3$  Hz), 111.78 (d,  $J = 19.7$  Hz), 109.93 (dd,  $J = 7.3$ , 3.8 Hz), 37.78 (s). HRMS (ESI):  $m/z$  calcd. for  $\text{C}_9\text{H}_9\text{F}_2\text{N}_2\text{O}$  [ $\text{M} + \text{H}$ ] $^+$ : 199.0677, found: 199.0668.

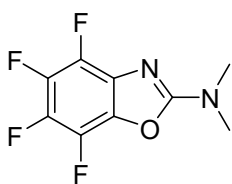

**4,5,6,7-tetrafluoro-*N,N*-dimethylbenzo[*d*]oxazol-2-amine (3w)**

The title compound was achieved as a yellow solid, 16.8 mg, 36% yield; m.p. 85-86 °C;  $R_f = 0.67$  (petroleum ether / ethyl acetate = 3:1);  $^1\text{H NMR}$  (400 MHz,  $\text{CDCl}_3$ )  $\delta = 3.23$  (s, 6H).  $^{13}\text{C NMR}$  (100 MHz,  $\text{CDCl}_3$ )  $\delta = 163.53$  (s), 139.86 (m), 137.58 – 136.65 (m), 135.07 – 134.48 (m), 133.96 – 133.54 (m), 132.17 (m), 131.25 (m), 37.86 (s). HRMS (ESI):  $m/z$  calcd. for  $\text{C}_9\text{H}_7\text{F}_4\text{N}_2\text{O}$  [ $\text{M} + \text{H}$ ] $^+$ : 235.0489, found: 235.0482.

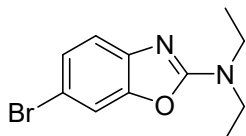

**6-bromo-*N,N*-diethylbenzo[*d*]oxazol-2-amine (4a)<sup>3</sup>**

The title compound was achieved as a white solid, 45.0 mg, 84% yield; m.p. 49-50 °C;  $R_f = 0.73$  (petroleum ether / ethyl acetate = 3:1);  $^1\text{H NMR}$  (400 MHz,  $\text{CDCl}_3$ )  $\delta = 7.35$  (d,  $J = 1.8$  Hz, 1H), 7.23 (dd,  $J = 8.3$ , 1.8 Hz, 1H), 7.16 (d,  $J = 8.3$  Hz, 1H), 3.54 (q,  $J = 7.1$  Hz, 4H), 1.25 (t,  $J = 7.1$  Hz, 6H).  $^{13}\text{C NMR}$  (100 MHz,  $\text{CDCl}_3$ )  $\delta = 162.3$ , 149.2, 142.8, 126.8, 116.6, 112.0, 111.8, 43.1, 13.4.

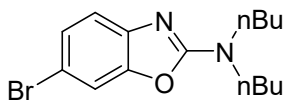

**6-bromo-*N,N*-dibutylbenzo[*d*]oxazol-2-amine (4b)<sup>4</sup>**

The title compound was achieved as a brown oil, 51.8 mg, 80% yield;  $R_f = 0.64$  (petroleum ether / ethyl acetate = 5:1);  $^1\text{H NMR}$  (400 MHz,  $\text{CDCl}_3$ )  $\delta = 7.37$  (d,  $J = 1.6$  Hz, 1H), 7.24 (dd,  $J = 8.3$ , 1.8 Hz, 1H), 7.17 (d,  $J = 8.3$  Hz, 1H), 3.50 – 3.45 (m, 4H), 1.64 (dd,  $J = 9.0$ , 6.2 Hz, 4H), 1.37 (dd,  $J = 15.1$ , 7.5 Hz, 4H), 0.95 (t,  $J = 7.4$  Hz, 6H).  $^{13}\text{C NMR}$  (100 MHz,  $\text{CDCl}_3$ )  $\delta = 162.8$ , 149.2, 143.1, 126.8, 116.6, 112.0, 111.7, 48.4, 30.1, 20.0, 13.8.

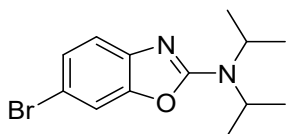

#### 6-bromo-*N,N*-diisopropylbenzo[*d*]oxazol-2-amine (4c)

The title compound was achieved as a brown solid, 42.6 mg, 72% yield; m.p. 52-53 °C;  $R_f = 0.48$  (petroleum ether / ethyl acetate = 5:1);  $^1\text{H NMR}$  (400 MHz,  $\text{CDCl}_3$ )  $\delta = 7.39$  (d,  $J = 1.8$  Hz, 1H), 7.24 (dd,  $J = 8.3, 1.8$  Hz, 1H), 7.17 (d,  $J = 8.3$  Hz, 1H), 4.19 (dt,  $J = 13.7, 6.8$  Hz, 2H), 1.36 (s, 6H), 1.35 (s, 6H).  $^{13}\text{C NMR}$  (100 MHz,  $\text{CDCl}_3$ )  $\delta = 162.4, 149.0, 142.3, 126.7, 116.4, 111.9, 111.7, 47.9, 20.8$ . HRMS (ESI):  $m/z$  calcd. for  $\text{C}_{13}\text{H}_{18}\text{BrN}_2\text{O}$   $[\text{M} + \text{H}]^+$ : 297.0597, found: 297.0606.

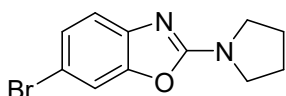

#### 6-bromo-2-(pyrrolidin-1-yl)benzo[*d*]oxazole (4d)

The title compound was achieved as a white solid, 43.1 mg, 81% yield; m.p. 132-133 °C;  $R_f = 0.22$  (petroleum ether / ethyl acetate = 3:1);  $^1\text{H NMR}$  (400 MHz,  $\text{CDCl}_3$ )  $\delta = 7.36$  (d,  $J = 1.4$  Hz, 1H), 7.24 (dt,  $J = 8.3, 1.6$  Hz, 1H), 7.17 (dd,  $J = 8.3, 1.1$  Hz, 1H), 3.63 – 3.59 (m, 4H), 2.02 (dd,  $J = 7.5, 5.8$  Hz, 4H).  $^{13}\text{C NMR}$  (100 MHz,  $\text{CDCl}_3$ )  $\delta = 161.1, 149.5, 143.0, 126.9, 116.8, 112.1, 111.9, 47.5, 25.6$ . HRMS (ESI):  $m/z$  calcd. for  $\text{C}_{11}\text{H}_{12}\text{BrN}_2\text{O}$   $[\text{M} + \text{H}]^+$ : 267.0128, found: 267.0116.

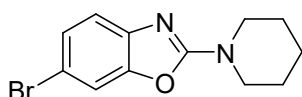

#### 6-bromo-2-(piperidin-1-yl)benzo[*d*]oxazole (4e)

The title compound was achieved as a brown solid, 47.6 mg, 85% yield; m.p. 76-77 °C;  $R_f = 0.32$  (petroleum ether / ethyl acetate = 5:1);  $^1\text{H NMR}$  (400 MHz,  $\text{CDCl}_3$ )  $\delta = 7.33$  (d,  $J = 1.7$  Hz, 1H), 7.22 (dd,  $J = 8.3, 1.7$  Hz, 1H), 7.15 (d,  $J = 8.3$  Hz, 1H), 3.61 (s, 4H), 1.65 (s, 6H).  $^{13}\text{C NMR}$  (100 MHz,  $\text{CDCl}_3$ )  $\delta = 162.5, 149.1, 142.6, 126.9, 116.8, 112.2, 112.1, 46.6, 25.2, 24.0$ . HRMS (ESI):  $m/z$  calcd. for  $\text{C}_{12}\text{H}_{14}\text{BrN}_2\text{O}$   $[\text{M} + \text{H}]^+$ : 281.0284, found: 281.0292.

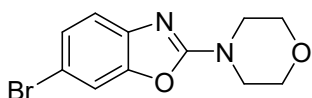

#### 6-bromo-2-morpholinobenzo[*d*]oxazole (4f)

The title compound was achieved as a light brown solid, 49.6 mg, 88% yield; m.p. 111-112 °C;  $R_f = 0.21$  (petroleum ether / ethyl acetate = 3:1);  $^1\text{H NMR}$  (400 MHz,  $\text{CDCl}_3$ )  $\delta = 7.37$  (d,  $J = 1.8$  Hz, 1H), 7.27 – 7.24 (m, 1H), 7.18 (d,  $J = 8.3$  Hz, 1H), 3.79 – 3.76 (m, 4H), 3.65 – 3.62 (m, 4H).  $^{13}\text{C NMR}$  (100 MHz,  $\text{CDCl}_3$ )  $\delta = 162.2, 149.2, 142.2, 127.2, 117.3, 112.9, 112.4, 66.1, 45.7$ . HRMS (ESI):  $m/z$  calcd. for  $\text{C}_{11}\text{H}_{12}\text{BrN}_2\text{O}_2$   $[\text{M} + \text{H}]^+$ : 283.0077, found: 283.0084.

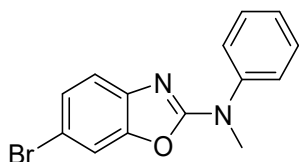

#### 6-bromo-N-methyl-N-phenylbenzo[d]oxazol-2-amine (4g)

The title compound was achieved as a white solid, 49.5 mg, 82% yield; m.p. 104-105 °C;  $R_f = 0.48$  (petroleum ether / ethyl acetate = 1:1);  $^1\text{H NMR}$  (400 MHz,  $\text{CDCl}_3$ )  $\delta = 7.47 - 7.42$  (m, 2H), 7.42 – 7.37 (m, 3H), 7.32 – 7.26 (m, 3H), 3.62 (s, 3H).  $^{13}\text{C NMR}$  (100 MHz,  $\text{CDCl}_3$ )  $\delta = 161.6, 149.2, 142.6, 142.1, 129.4, 127.3, 126.5, 124.7, 117.6, 113.2, 112.6, 39.2$ . HRMS (ESI):  $m/z$  calcd. for  $\text{C}_{14}\text{H}_{12}\text{BrN}_2\text{O}$   $[\text{M} + \text{H}]^+$ : 303.0128, found: 303.0117.

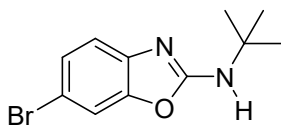

#### 6-bromo-N-(tert-butyl)benzo[d]oxazol-2-amine (4h)

The title compound was achieved as a brown solid, 45.5 mg, 85% yield; m.p. 96-97 °C;  $R_f = 0.66$  (petroleum ether / ethyl acetate = 3:1);  $^1\text{H NMR}$  (400 MHz,  $\text{CDCl}_3$ )  $\delta = 7.38$  (d,  $J = 1.8$  Hz, 1H), 7.27 – 7.24 (m, 1H), 7.18 (d,  $J = 8.3$  Hz, 1H), 5.65 (s, 1H), 1.48 (s, 9H).  $^{13}\text{C NMR}$  (100 MHz,  $\text{CDCl}_3$ )  $\delta = 161.1, 148.6, 142.3, 126.8, 117.0, 112.6, 112.1, 52.3, 29.1$ . HRMS (ESI):  $m/z$  calcd. for  $\text{C}_{11}\text{H}_{14}\text{BrN}_2\text{O}$   $[\text{M} + \text{H}]^+$ : 269.0284, found: 269.0279.

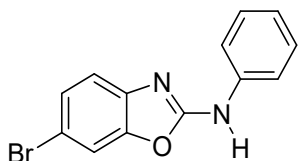

#### 6-bromo-N-phenylbenzo[d]oxazol-2-amine (4i)<sup>5</sup>

The title compound was achieved as a brown solid, 34.0 mg, 59% yield; m.p. 172-174 °C;  $R_f = 0.67$  (petroleum ether / ethyl acetate = 3:1);  $^1\text{H NMR}$  (400 MHz,  $\text{CDCl}_3$ )  $\delta = 8.15$  (s, 1H), 7.60 – 7.56 (m, 2H), 7.50 (d,  $J = 1.7$  Hz, 1H), 7.43 – 7.38 (m, 2H), 7.34 (dd,  $J = 11.7, 5.0$  Hz, 2H), 7.15 – 7.11 (m, 1H).  $^{13}\text{C NMR}$  (100 MHz,  $\text{CDCl}_3$ )  $\delta = 158.6, 148.3, 141.5, 137.4, 129.4, 127.5, 123.7, 118.6, 117.9, 114.0, 112.7$ .

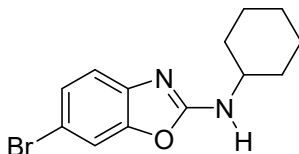

#### 6-bromo-N-cyclohexylbenzo[d]oxazol-2-amine (4j)

The title compound was achieved as a brown solid, 39.4 mg, 67% yield; m.p. 129-130 °C;  $R_f = 0.58$  (petroleum ether / ethyl acetate = 3:1);  $^1\text{H NMR}$  (400 MHz,  $\text{CDCl}_3$ )  $\delta = 7.37$  (d,  $J = 1.4$  Hz, 1H), 7.26 (dd,  $J = 5.3, 2.9$  Hz, 1H), 7.19 (d,  $J = 8.3$  Hz, 1H), 5.33 (s, 1H), 3.72 (s, 1H), 2.11 (dd,  $J = 11.8, 2.7$  Hz, 2H), 1.80 – 1.74 (m, 2H), 1.68 – 1.62 (m, 1H), 1.42 (ddd,  $J = 13.2, 10.0, 4.0$  Hz, 2H), 1.33 – 1.25 (m, 3H).  $^{13}\text{C NMR}$  (100 MHz,  $\text{CDCl}_3$ )  $\delta = 161.7, 148.8, 142.3, 127.0, 116.9, 112.6, 112.2, 52.2, 33.4, 25.4, 24.7$ .

HRMS (ESI):  $m/z$  calcd. for  $C_{13}H_{16}BrN_2O$   $[M + H]^+$ : 295.0441, found: 295.0428.

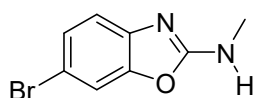

#### 6-bromo-N-methylbenzo[d]oxazol-2-amine (4k)

The title compound was achieved as a brown solid, 34.3 mg, 76% yield; m.p. 155-156 °C;  $R_f = 0.30$  (petroleum ether / ethyl acetate = 3:1);  $^1H$  NMR (400 MHz, DMSO- $d_6$ )  $\delta = 7.95$  (d,  $J = 4.5$  Hz, 1H), 7.57 (d,  $J = 1.8$  Hz, 1H), 7.24 (dd,  $J = 8.3, 1.9$  Hz, 1H), 7.16 (d,  $J = 8.3$  Hz, 1H), 2.90 (d,  $J = 4.7$  Hz, 3H).  $^{13}C$  NMR (100 MHz, DMSO- $d_6$ )  $\delta = 163.8, 149.3, 143.4, 126.9, 117.0, 112.2, 111.6, 29.3$ . HRMS (ESI):  $m/z$  calcd. for  $C_8H_8BrN_2O$   $[M + H]^+$ : 226.9815, found: 226.9806.

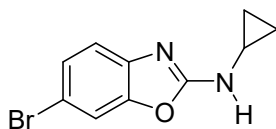

#### 6-bromo-N-cyclopropylbenzo[d]oxazol-2-amine (4l)

The title compound was achieved as a white solid, 33.2 mg, 66% yield; m.p. 118-119 °C;  $R_f = 0.28$  (petroleum ether / ethyl acetate = 3:1);  $^1H$  NMR (400 MHz,  $CDCl_3$ )  $\delta = 7.42$  (s, 1H), 7.31 – 7.24 (m, 2H), 5.86 (s, 1H), 2.84 (tt,  $J = 6.9, 3.5$  Hz, 1H), 0.89 (q,  $J = 6.7$  Hz, 2H), 0.75 – 0.63 (m, 2H).  $^{13}C$  NMR (100 MHz,  $CDCl_3$ )  $\delta = 163.0, 149.1, 142.2, 127.1, 117.3, 113.0, 112.4, 24.4, 7.3$ . HRMS (ESI):  $m/z$  calcd. for  $C_{10}H_{10}BrN_2O$   $[M + H]^+$ : 252.9971, found: 252.9962.

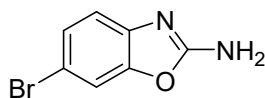

#### 6-bromobenzo[d]oxazol-2-amine (4m)<sup>6</sup>

The title compound was achieved as a brown solid, 22.0 mg, 52% yield; m.p. 152-153 °C;  $R_f = 0.32$  (petroleum ether / ethyl acetate = 1:1);  $^1H$  NMR (400 MHz, DMSO- $d_6$ )  $\delta = 7.57$  (d,  $J = 1.7$  Hz, 1H), 7.55 (s, 2H), 7.24 (dd,  $J = 8.3, 1.9$  Hz, 1H), 7.12 (d,  $J = 8.3$  Hz, 1H).  $^{13}C$  NMR (100 MHz, DMSO- $d_6$ )  $\delta = 163.6, 149.1, 143.7, 126.8, 116.9, 112.2, 111.5$ .

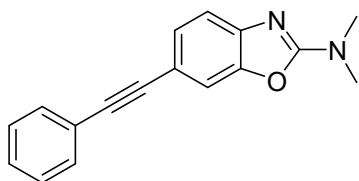

#### *N,N*-dimethyl-6-(phenylethynyl)benzo[d]oxazol-2-amine (5)

The title compound was achieved as a yellow solid, 44.6 mg, 85% yield; m.p. 136-137 °C;  $R_f = 0.23$  (petroleum ether / ethyl acetate = 3:1);  $^1H$  NMR (400 MHz,  $CDCl_3$ )  $\delta = 7.54 - 7.51$  (m, 2H), 7.40 (d,  $J = 1.2$  Hz, 1H), 7.38 – 7.35 (m, 1H), 7.34 (d,  $J = 5.6$  Hz, 1H), 7.32 (dt,  $J = 3.8, 1.8$  Hz, 2H), 7.27 (s, 1H), 3.20 (s, 6H).  $^{13}C$  NMR (100 MHz,  $CDCl_3$ )  $\delta = 163.7, 148.7, 144.3, 131.5, 128.4, 128.3, 128.0, 123.6, 115.7, 114.7, 111.7, 90.1, 88.0, 37.7$ . HRMS (ESI):  $m/z$  calcd. for  $C_{17}H_{15}N_2O$   $[M + H]^+$ : 263.1179, found: 263.1173.

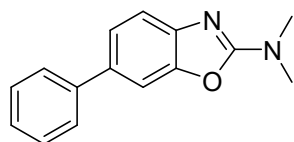

### ***N,N*-dimethyl-6-phenylbenzo[*d*]oxazol-2-amine (6)**

The title compound was achieved as a yellow solid, 41.9 mg, 88% yield; m.p. 125-126 °C;  $R_f = 0.22$  (petroleum ether / ethyl acetate = 3:1);  $^1\text{H NMR}$  (400 MHz,  $\text{CDCl}_3$ )  $\delta = 7.58$  (dt,  $J = 8.2, 1.7$  Hz, 2H), 7.49 (d,  $J = 0.9$  Hz, 1H), 7.46 – 7.41 (m, 2H), 7.41 – 7.40 (m, 2H), 7.34 – 7.29 (m, 1H), 3.22 (d,  $J = 0.7$  Hz, 6H).  $^{13}\text{C NMR}$  (100 MHz,  $\text{CDCl}_3$ )  $\delta = 163.4, 149.8, 143.1, 141.4, 134.1, 128.8, 127.1, 126.7, 123.2, 115.9, 107.4, 37.7$ . HRMS (ESI):  $m/z$  calcd. for  $\text{C}_{15}\text{H}_{15}\text{N}_2\text{O}$  [ $\text{M} + \text{H}$ ] $^+$ : 239.1179, found: 239.1174.

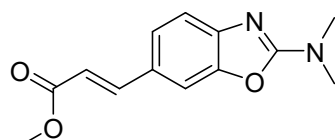

### **methyl (E)-3-(2-(dimethylamino)benzo[*d*]oxazol-6-yl)acrylate (7)**

The title compound was achieved as a yellow solid, 44.8 mg, 91% yield; m.p. 104-106 °C;  $R_f = 0.28$  (petroleum ether / ethyl acetate = 1:1);  $^1\text{H NMR}$  (400 MHz,  $\text{CDCl}_3$ )  $\delta = 7.71$  (d,  $J = 15.9$  Hz, 1H), 7.41 (d,  $J = 1.3$  Hz, 1H), 7.33 (dd,  $J = 8.2, 1.5$  Hz, 1H), 7.30 – 7.27 (m, 1H), 6.51 – 6.11 (m, 1H), 3.79 (s, 3H), 3.21 (s, 6H).  $^{13}\text{C NMR}$  (100 MHz,  $\text{CDCl}_3$ )  $\delta = 167.8, 164.0, 149.5, 146.3, 145.4, 127.1, 125.7, 115.8, 115.1, 107.4, 51.6, 37.7$ . HRMS (ESI):  $m/z$  calcd. for  $\text{C}_{13}\text{H}_{15}\text{N}_2\text{O}_3$  [ $\text{M} + \text{H}$ ] $^+$ : 247.1077, found: 247.1073.

## **E. Reference**

1. A. Lukin, N. Kalinchenkova, T. Vedekhina, N. Zhurilo and M. Krasavin, Diversity-oriented synthesis of *N,N*-dimethylamino-substituted azoles employing TBTU, *Tetrahedron Lett.*, 2018, **59**, 2732-2735.
2. W. Xu, M.-T. Zeng, S.-S. Liu, Y.-S. Li and Z.-B. Dong, Copper catalyzed synthesis of benzoxazoles and benzothiazoles via tandem manner, *Tetrahedron Lett.*, 2017, **58**, 4289-4292.
3. M. Pattarawarapan, D. Yamano, N. Wiriya and W. Phakhodee, Metal-Free Synthesis of 2-*N,N*-Dialkylaminobenzoxazoles Using Tertiary Amines as the Nitrogen Source, *J. Org. Chem.*, 2019, **84**, 6516-6523.
4. M. Pattarawarapan, N. Wiriya, S. Yimklan, S. Wangngae and W. Phakhodee, Zwitterionic Ring-Opened Oxyphosphonium Species from the  $\text{Ph}_3\text{P}-\text{I}_2$  Mediated Reactions of Benzo[*d*]oxazol-2(3H)-ones with Secondary Amines, *J. Org. Chem.*, 2020, **85**, 6151-6158.
5. Y. Xu, F. Li, N. Zhao, J. Su, C. Wang, C. Wang, Z. Li and L. Wang, Environment-friendly and efficient synthesis of 2-aminobenzoxazoles and 2-aminobenzothiazoles catalyzed by Vitreoscilla hemoglobin incorporating a cobalt porphyrin cofactor, *Green Chemistry*, 2021, **23**, 8047-8052.
6. M. Kasthuri, H. S. Babu, K. S. Kumar, C. Sudhakar and P. V. N. Kumar, A Facile Synthesis of 2-Aminobenzoxazoles and 2-Aminobenzimidazoles Using *N*-Cyano-*N*-phenyl-*p*-toluenesulfonamide (NCTS) as an Efficient Electrophilic Cyanating Agent, *Synlett*, 2015, **26**, 897-900.

## F. Copies of $^1\text{H}$ and $^{13}\text{C}$ NMR spectra

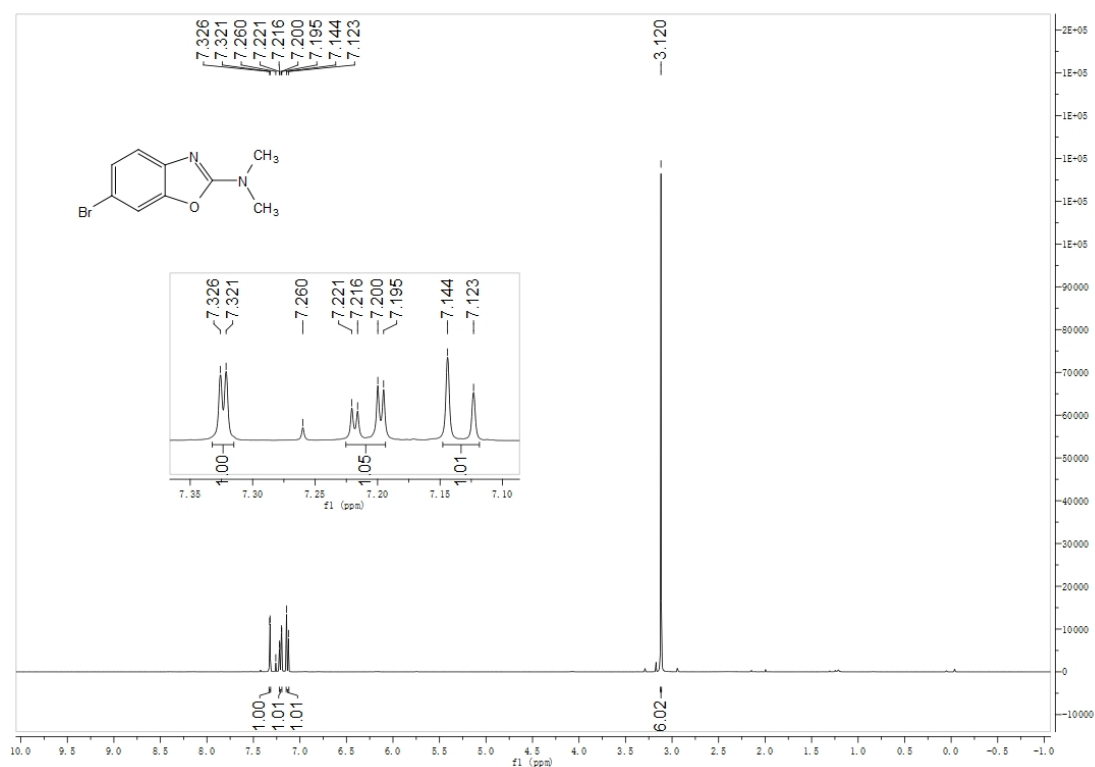

Figure S1.  $^1\text{H}$  NMR Spectrum of 3a (400 MHz,  $\text{CDCl}_3$ )

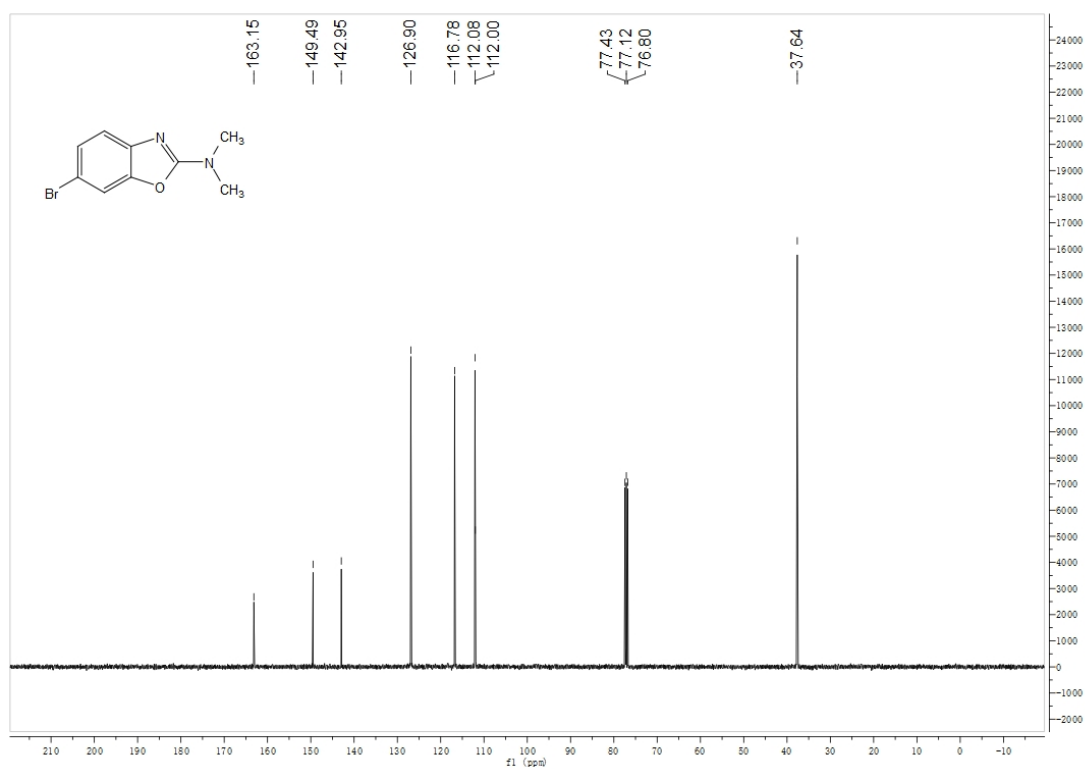

Figure S2.  $^{13}\text{C}$  NMR Spectrum of 3a (100 MHz,  $\text{CDCl}_3$ )

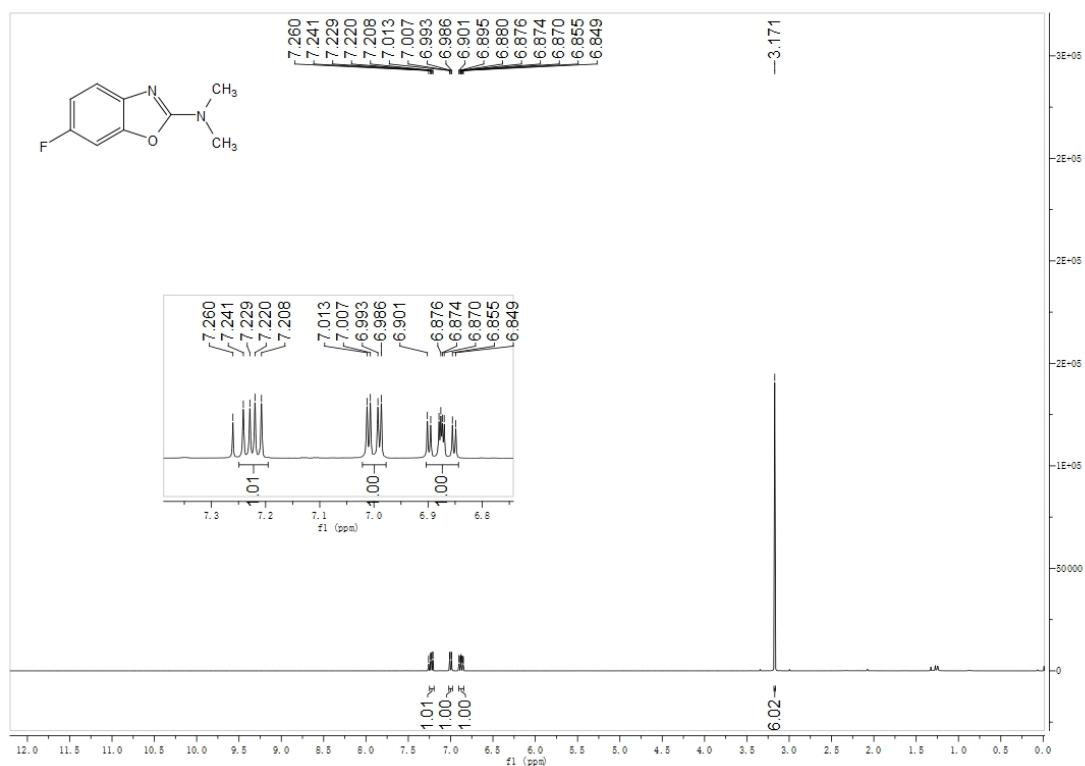

Figure S3. <sup>1</sup>H NMR Spectrum of 3b (400 MHz, CDCl<sub>3</sub>)

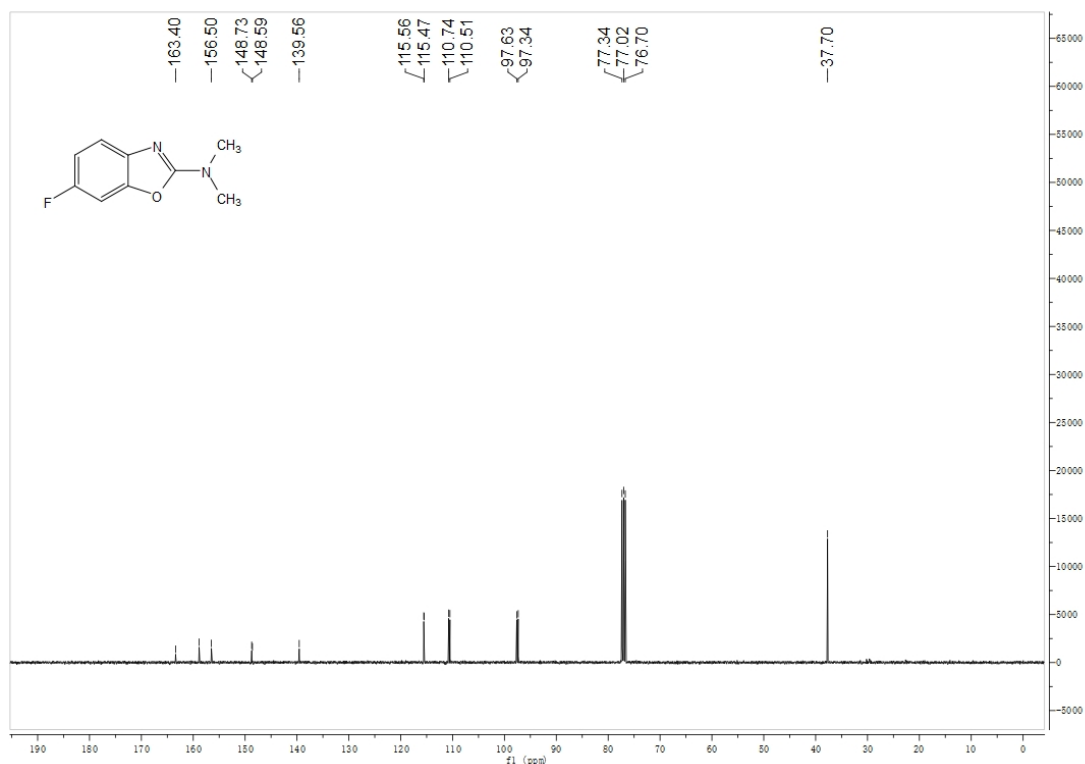

Figure S4. <sup>13</sup>C NMR Spectrum of 3b (100 MHz, CDCl<sub>3</sub>)



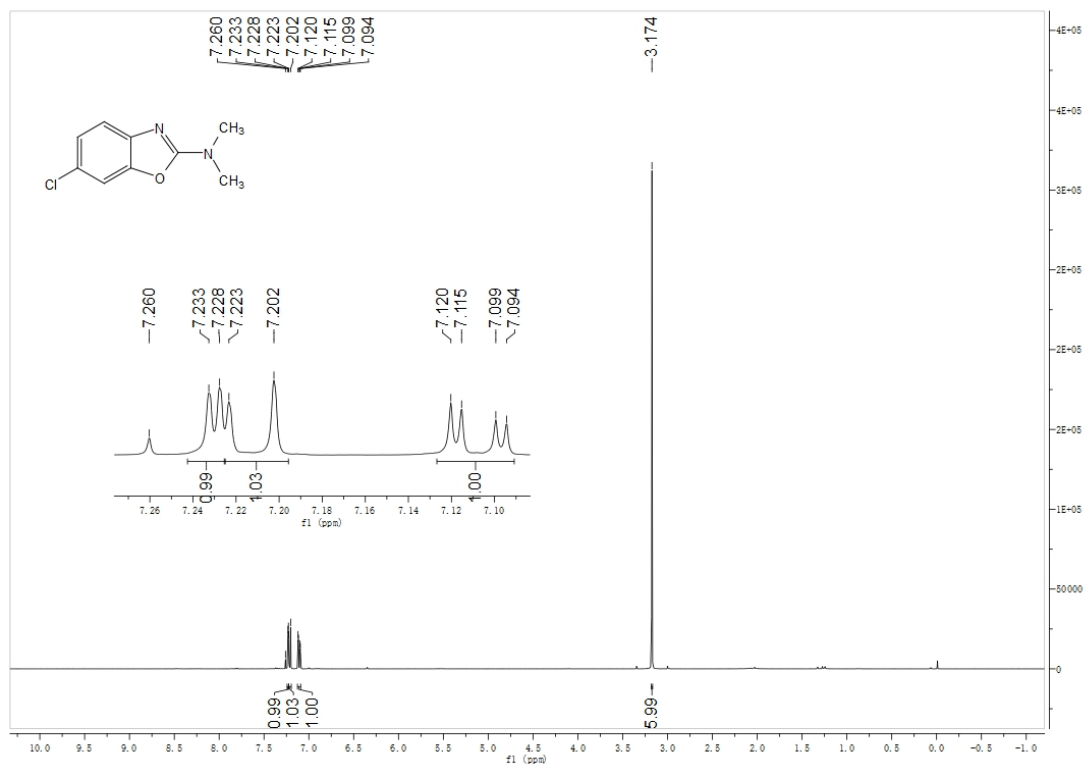

Figure S5. <sup>1</sup>H NMR Spectrum of 3c (400 MHz, CDCl<sub>3</sub>)

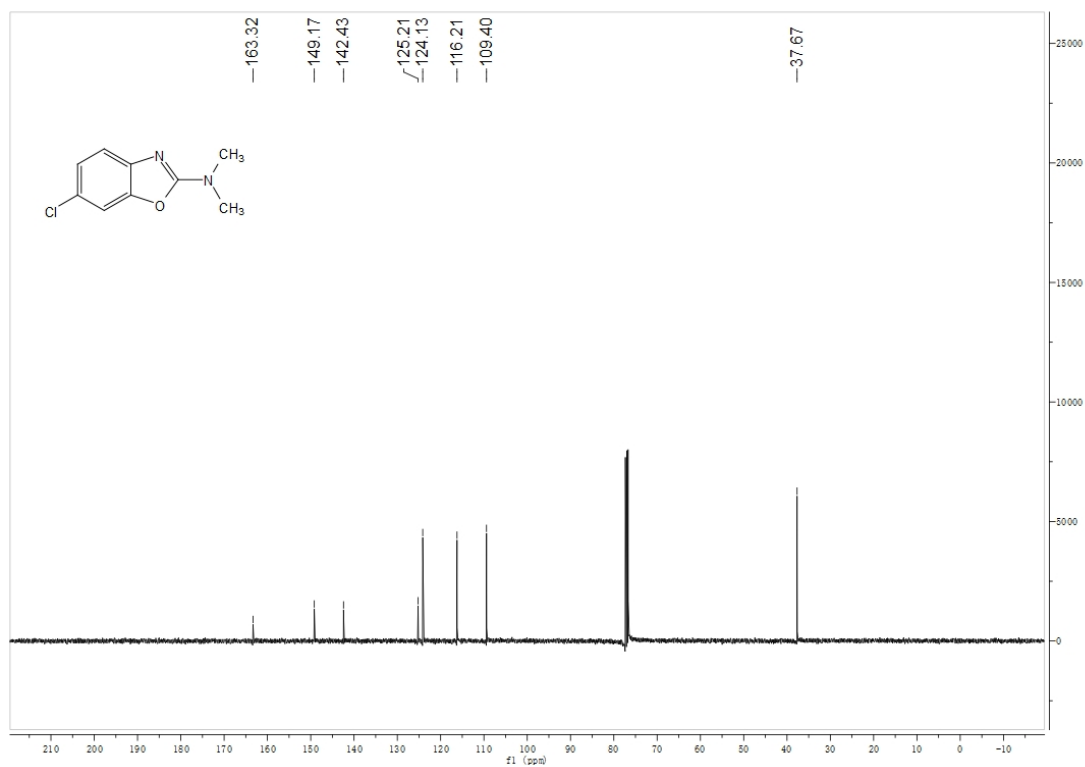

Figure S6. <sup>13</sup>C NMR Spectrum of 3c (100 MHz, CDCl<sub>3</sub>)

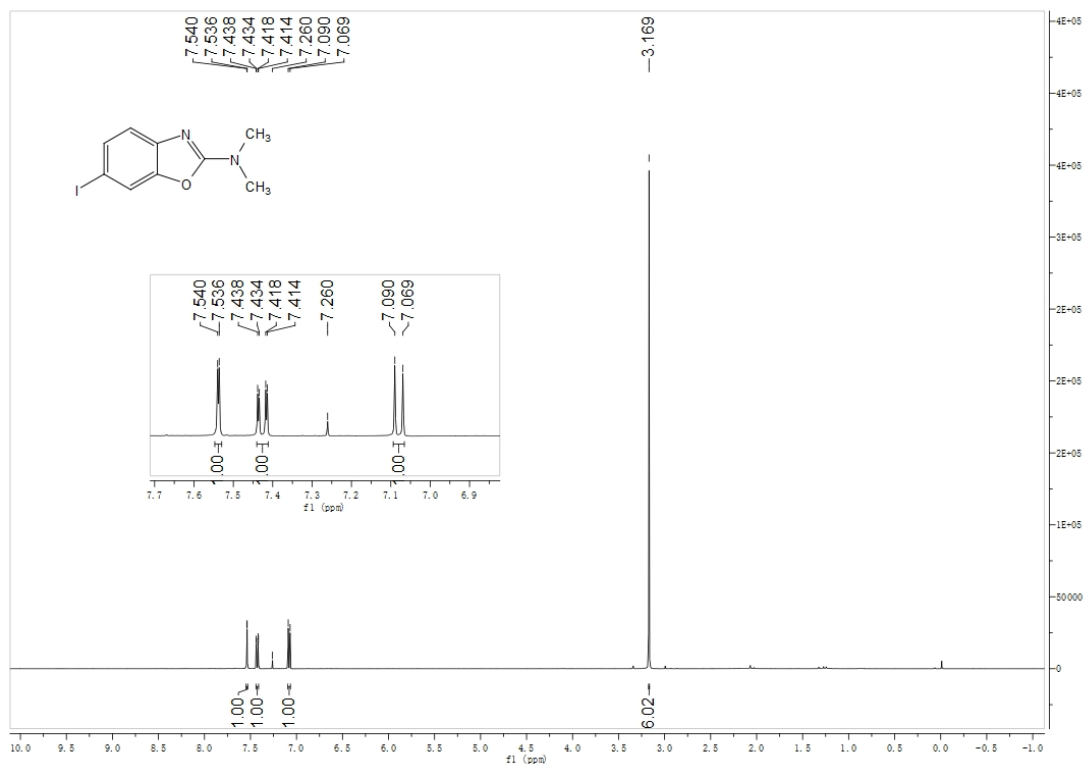

Figure S7.  $^1\text{H}$  NMR Spectrum of 3d (400 MHz,  $\text{CDCl}_3$ )

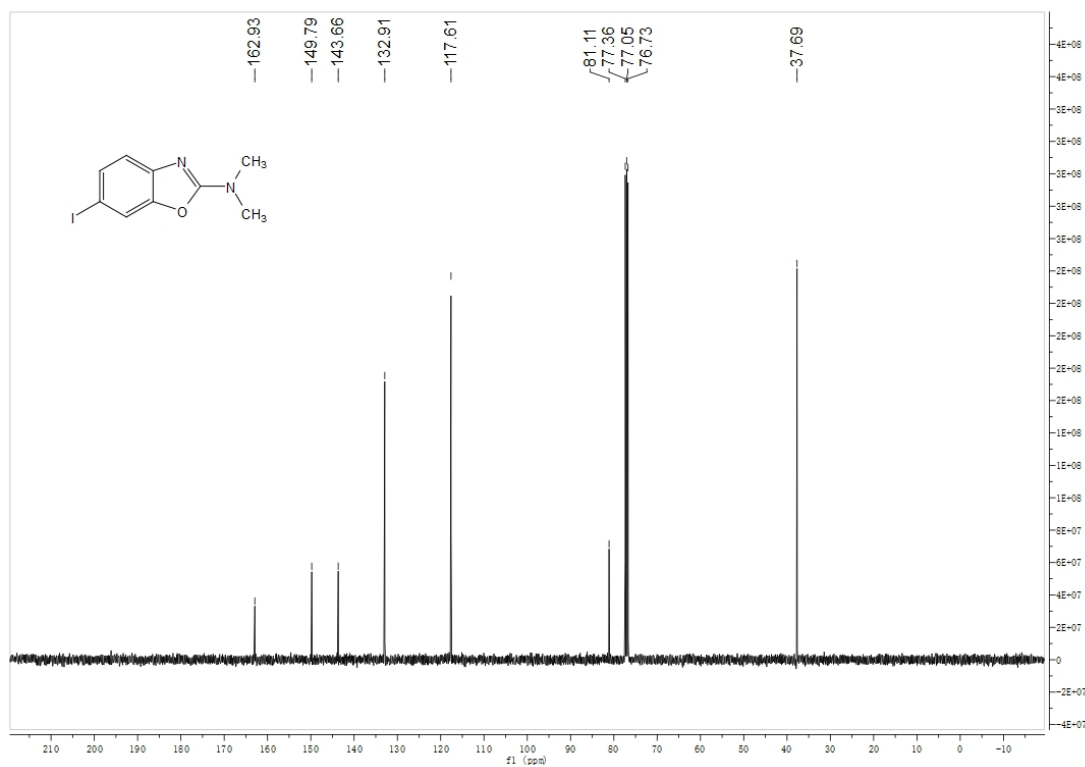

Figure S8.  $^{13}\text{C}$  NMR Spectrum of 3d (100 MHz,  $\text{CDCl}_3$ )

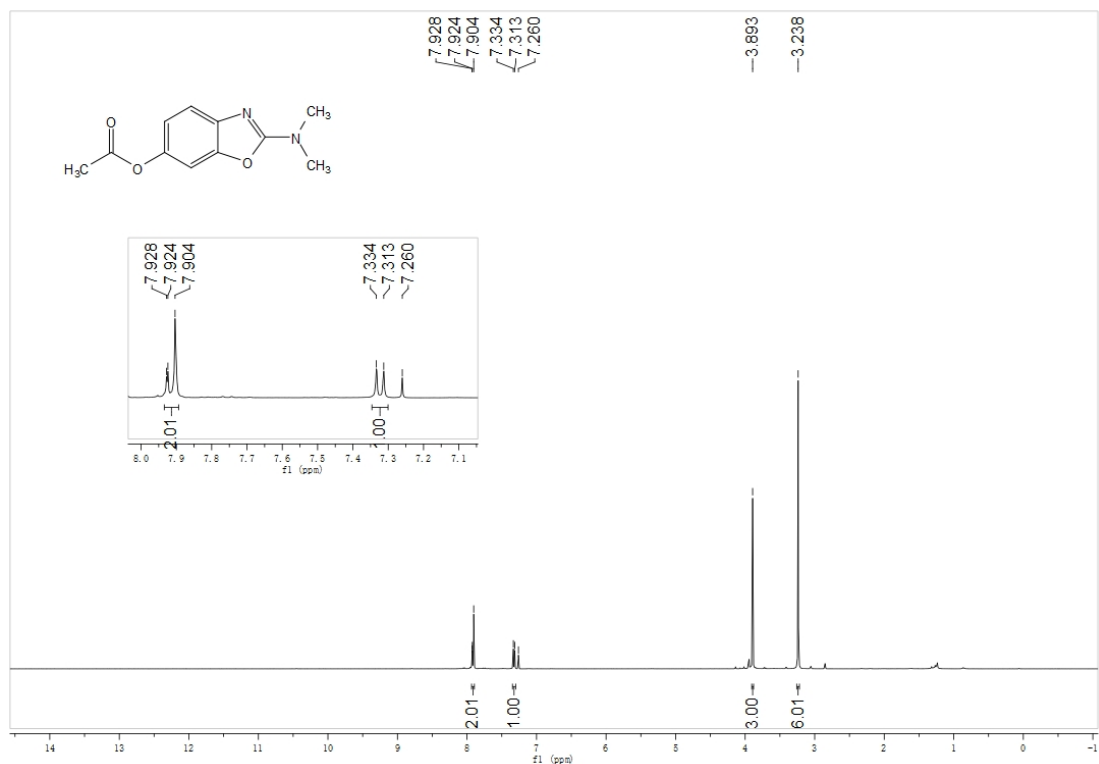

Figure S9. <sup>1</sup>H NMR Spectrum of 3e (400 MHz, CDCl<sub>3</sub>)

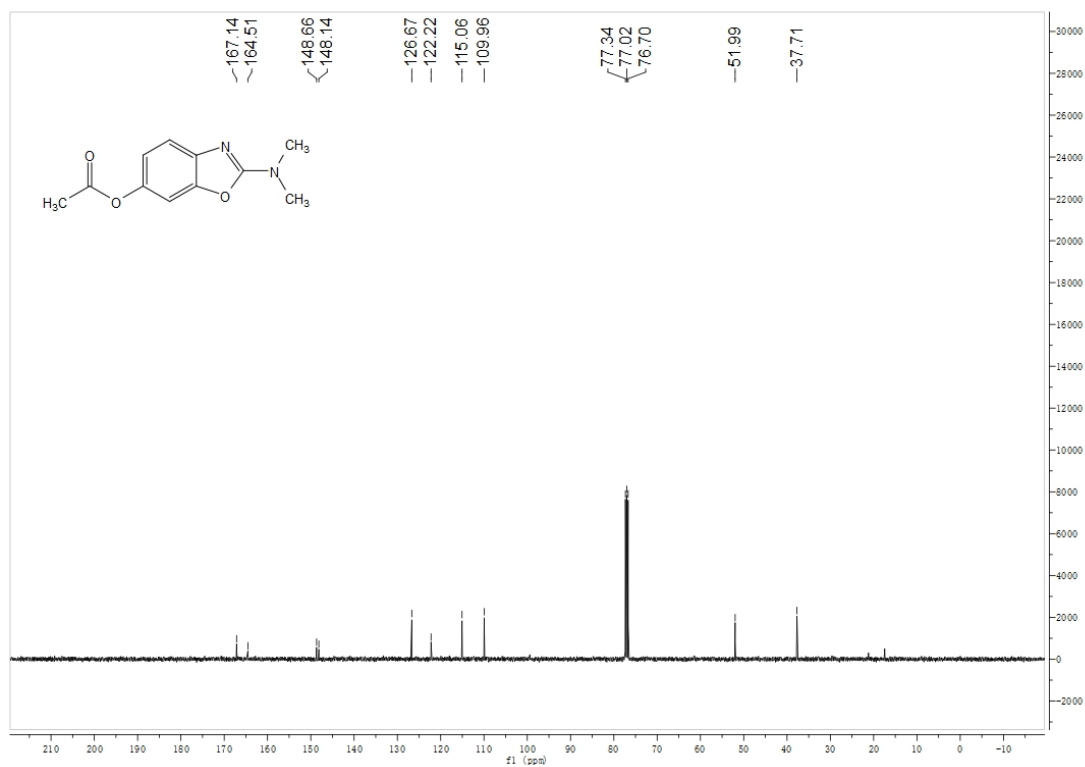

Figure S10. <sup>13</sup>C NMR Spectrum of 3e (100 MHz, CDCl<sub>3</sub>)

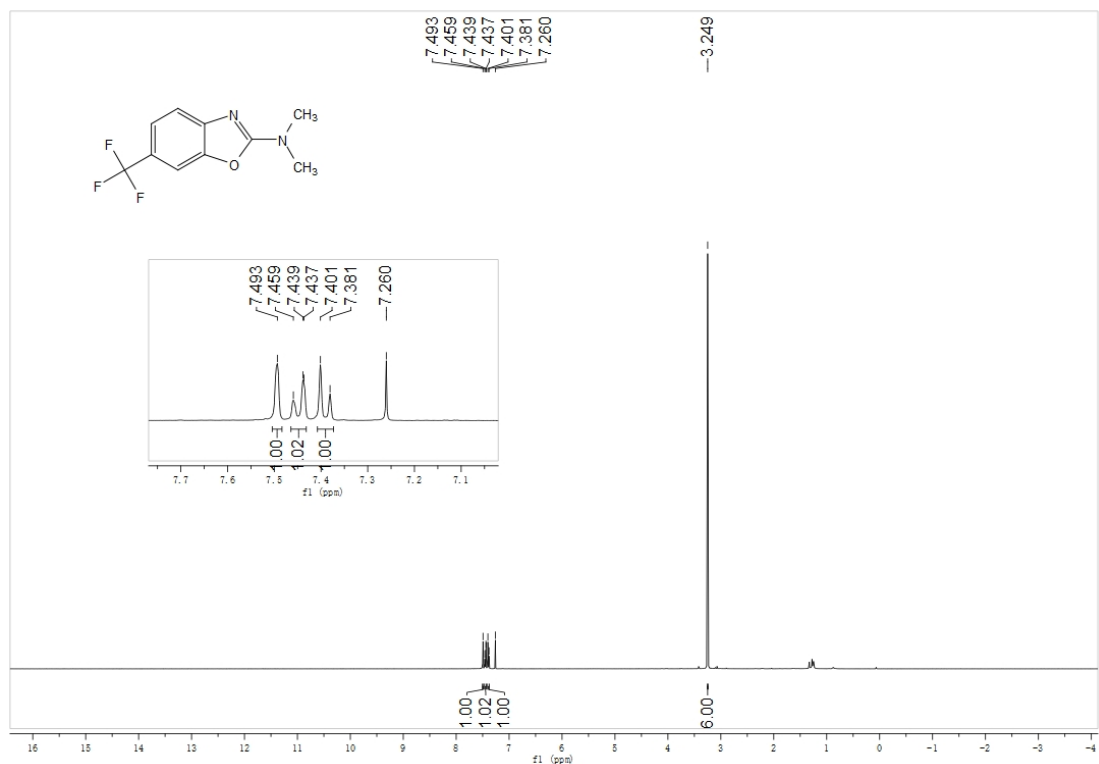

Figure S11. <sup>1</sup>H NMR Spectrum of 3f (400 MHz, CDCl<sub>3</sub>)

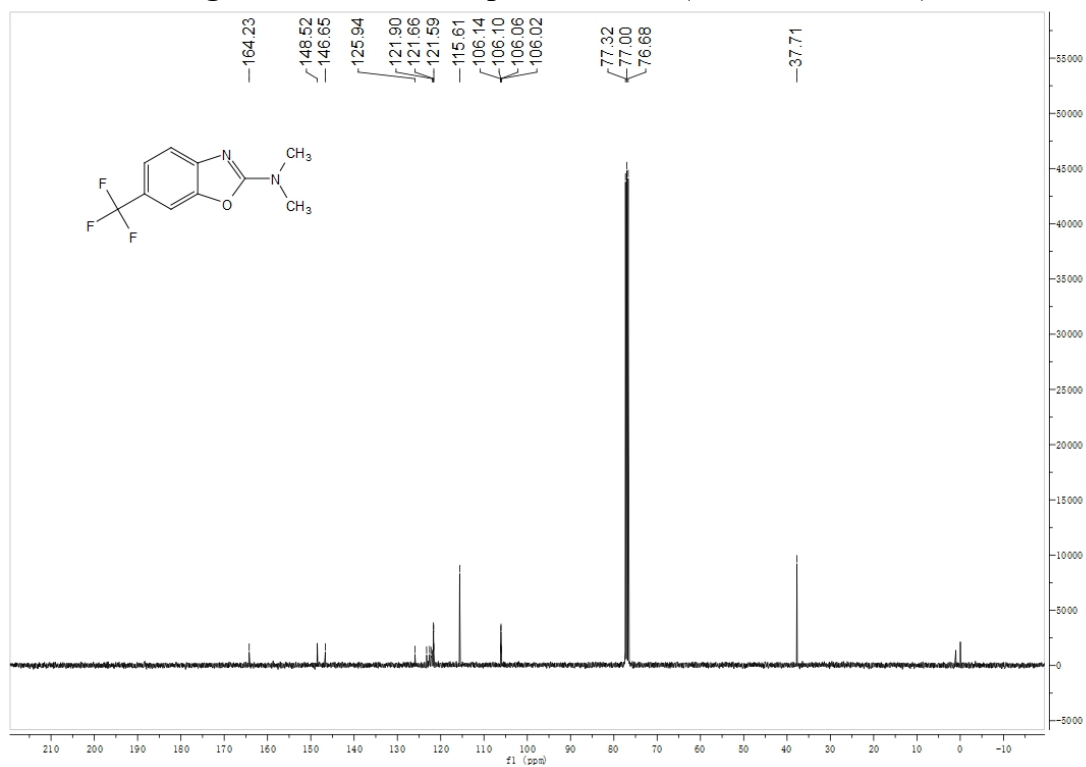

Figure S12. <sup>13</sup>C NMR Spectrum of 3f (100 MHz, CDCl<sub>3</sub>)

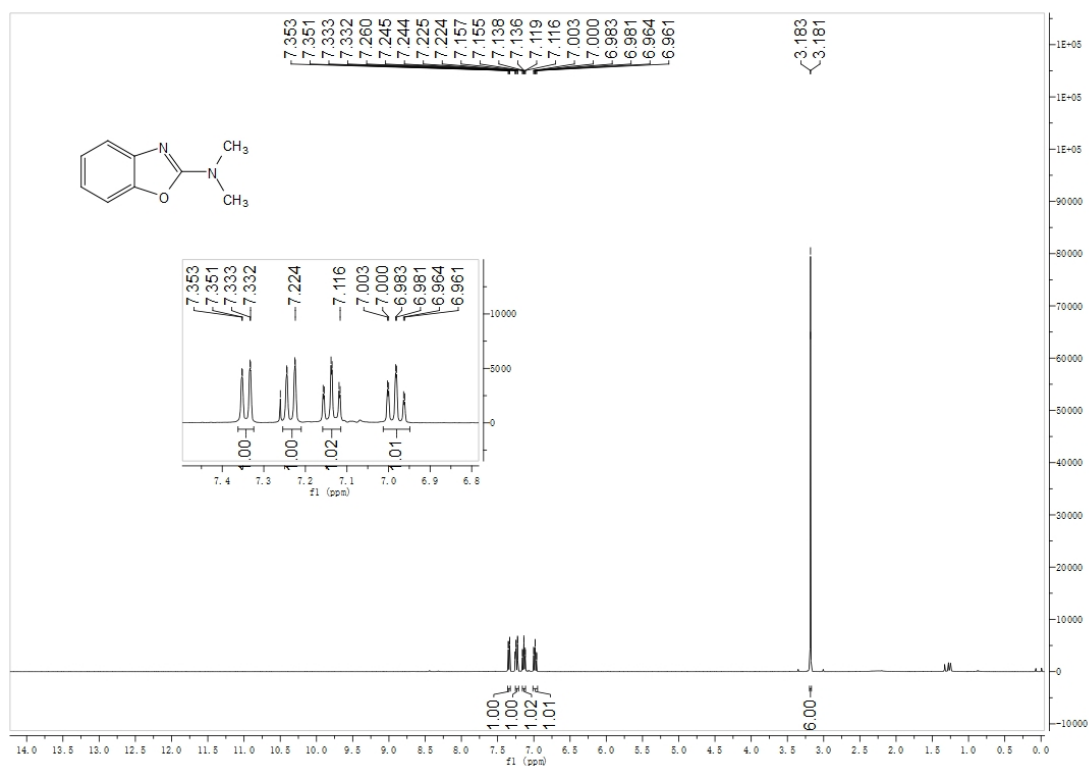

Figure S13. <sup>1</sup>H NMR Spectrum of 3g (400 MHz, CDCl<sub>3</sub>)

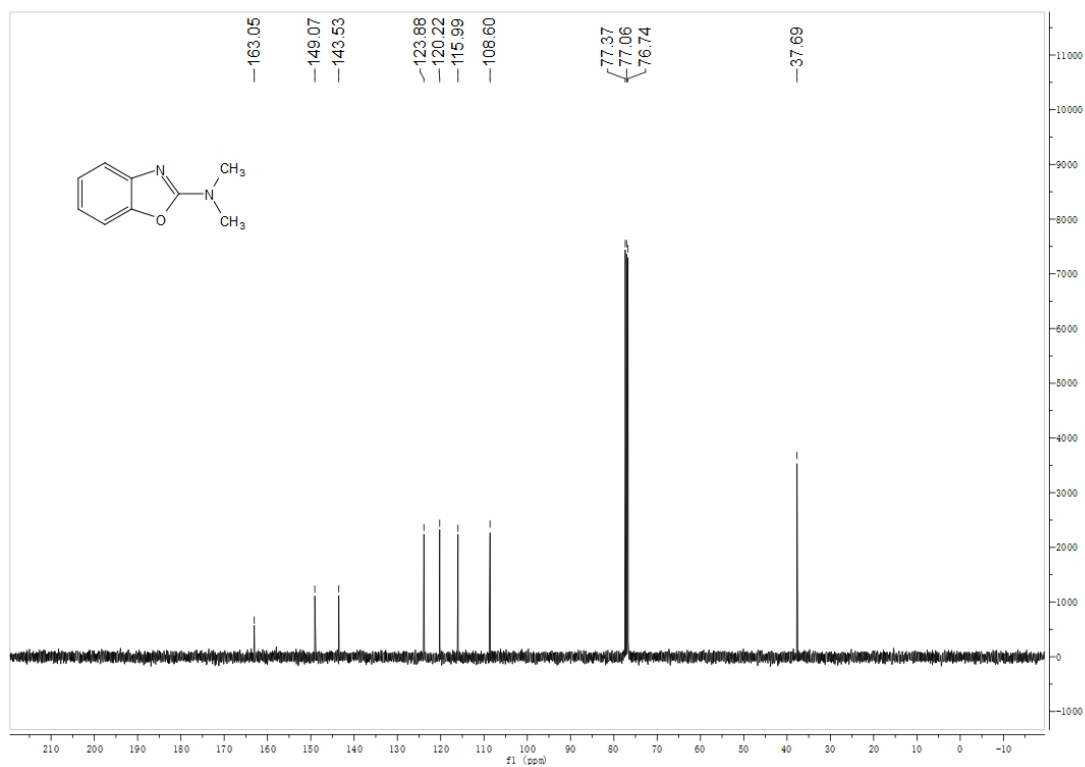

Figure S14. <sup>13</sup>C NMR Spectrum of 3g (100 MHz, CDCl<sub>3</sub>)

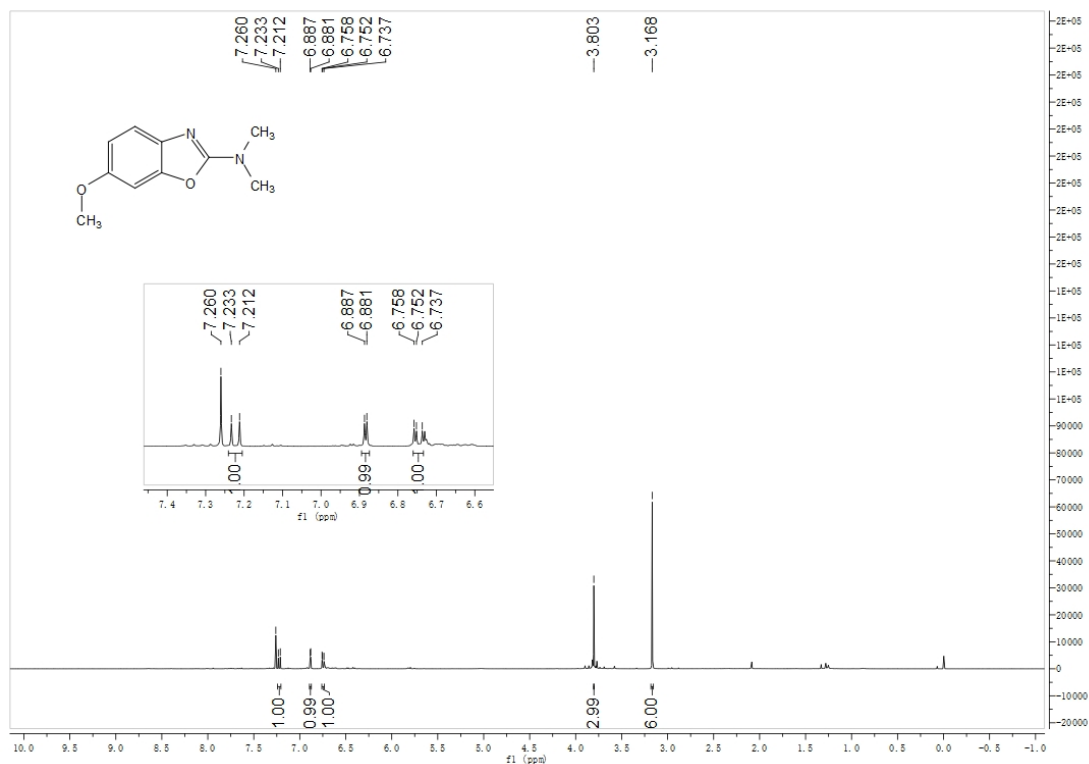

Figure S15. <sup>1</sup>H NMR Spectrum of 3h (400 MHz, CDCl<sub>3</sub>)

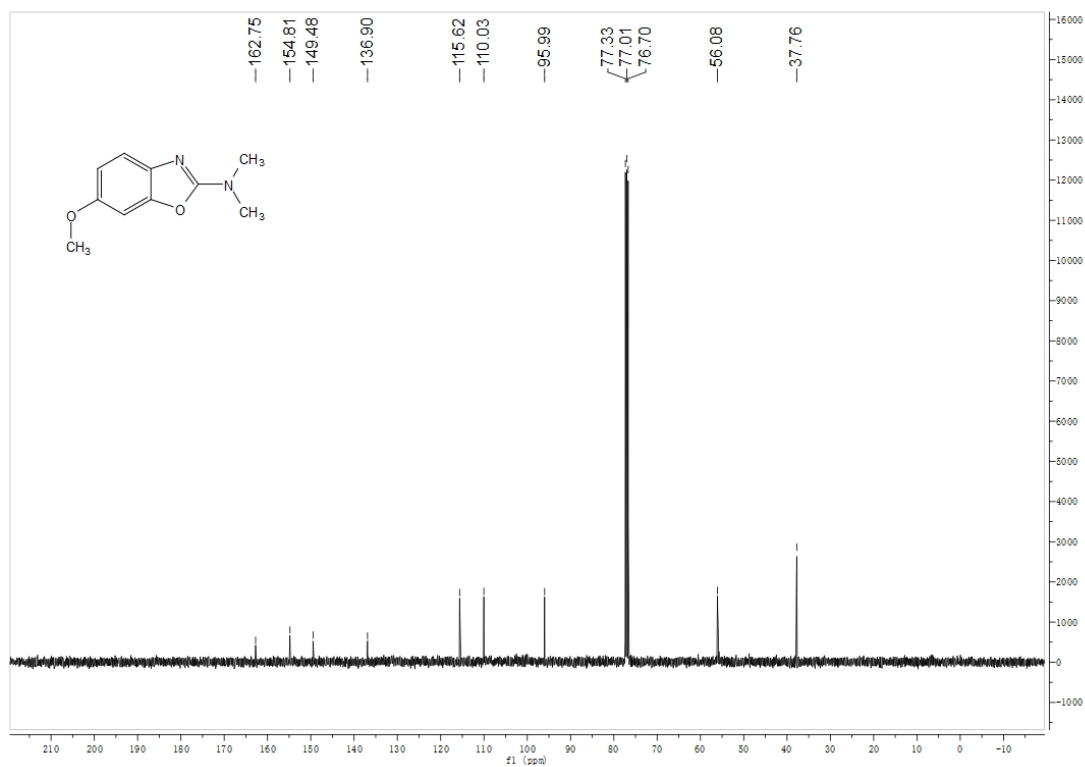

Figure S16. <sup>13</sup>C NMR Spectrum of 3h (100 MHz, CDCl<sub>3</sub>)

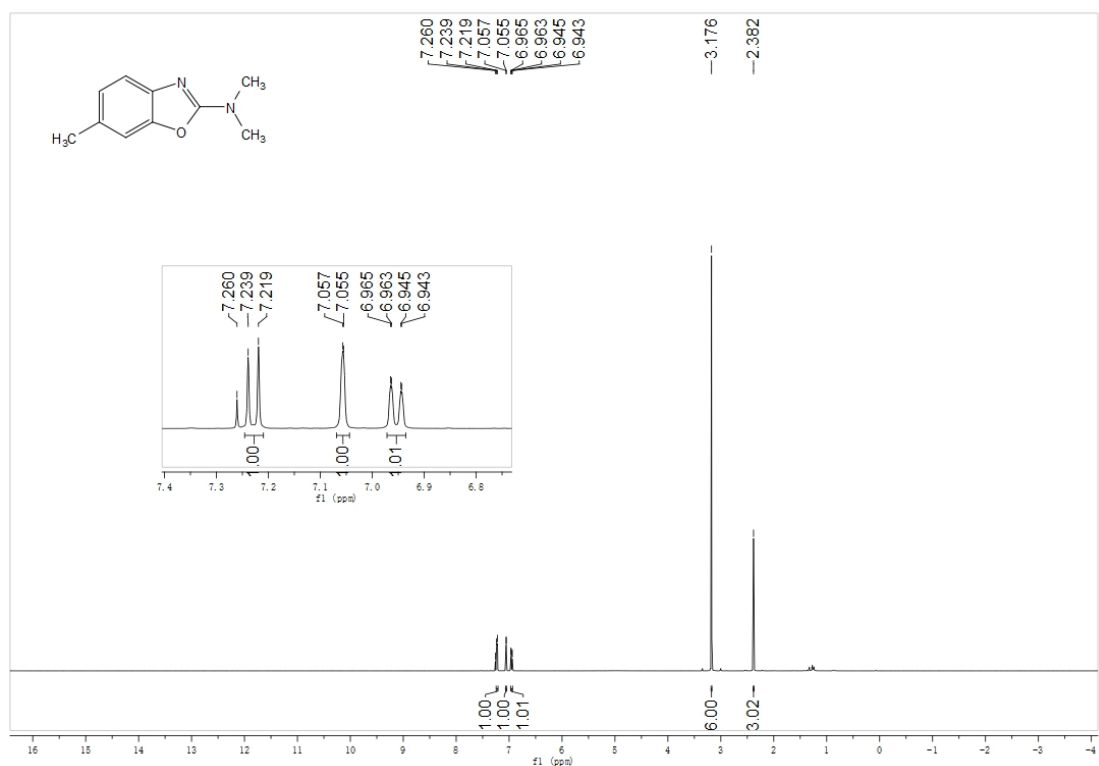

Figure S17. <sup>1</sup>H NMR Spectrum of 3i (400 MHz, CDCl<sub>3</sub>)

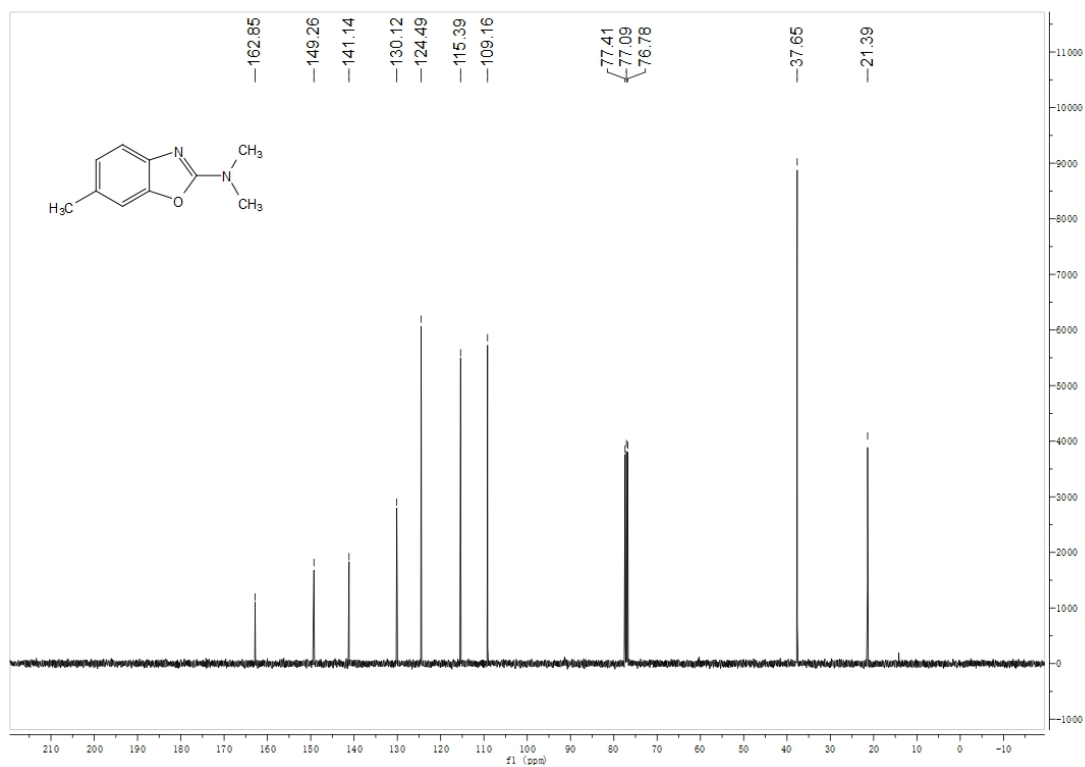

Figure S18. <sup>13</sup>C NMR Spectrum of 3i (100 MHz, CDCl<sub>3</sub>)

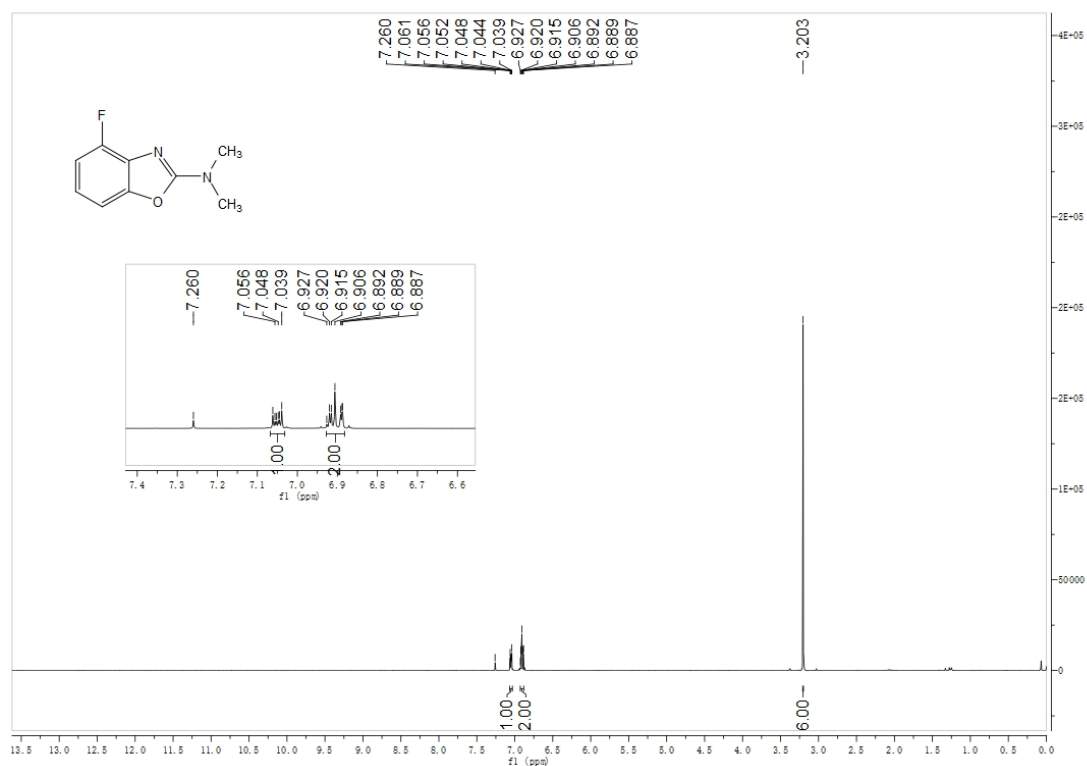

Figure S19. <sup>1</sup>H NMR Spectrum of 3j (400 MHz, CDCl<sub>3</sub>)

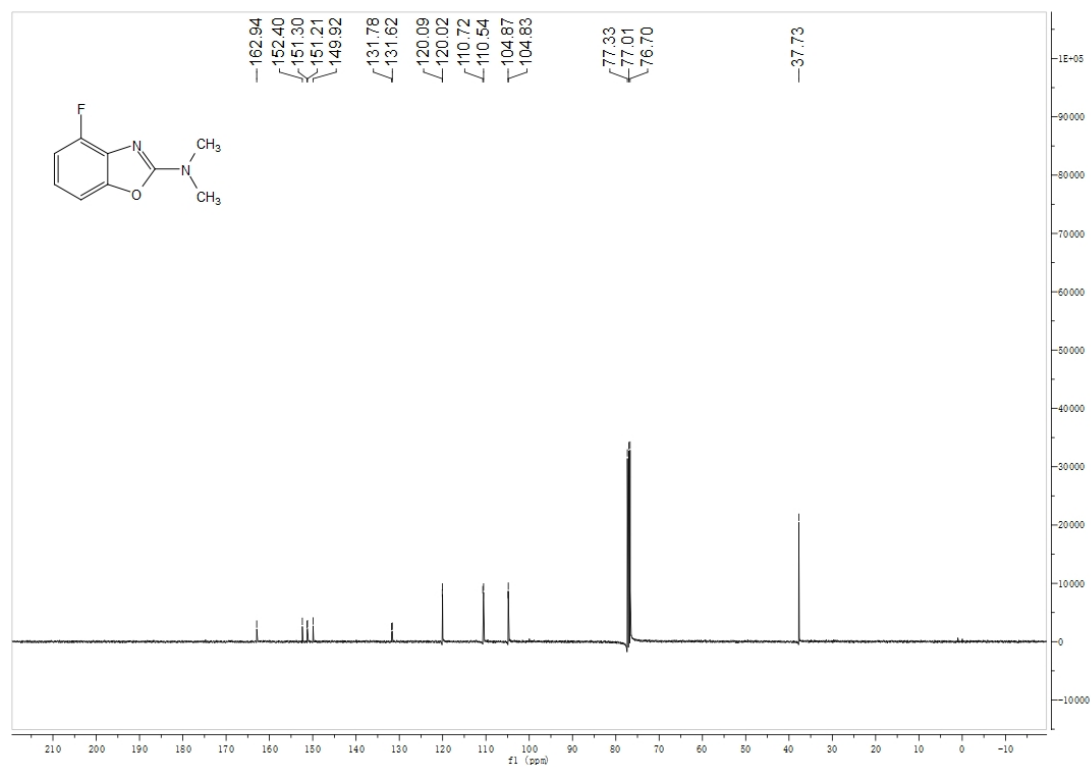

Figure S20. <sup>13</sup>C NMR Spectrum of 3j (100 MHz, CDCl<sub>3</sub>)



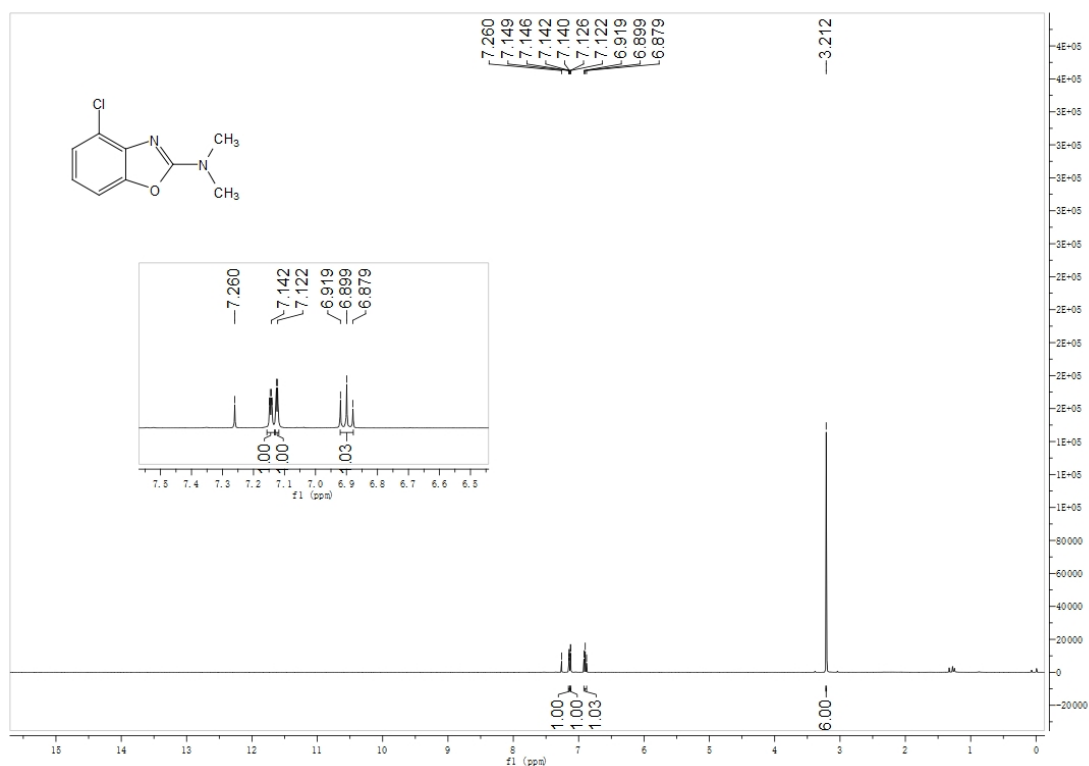

Figure S21. <sup>1</sup>H NMR Spectrum of 3k (400 MHz, CDCl<sub>3</sub>)

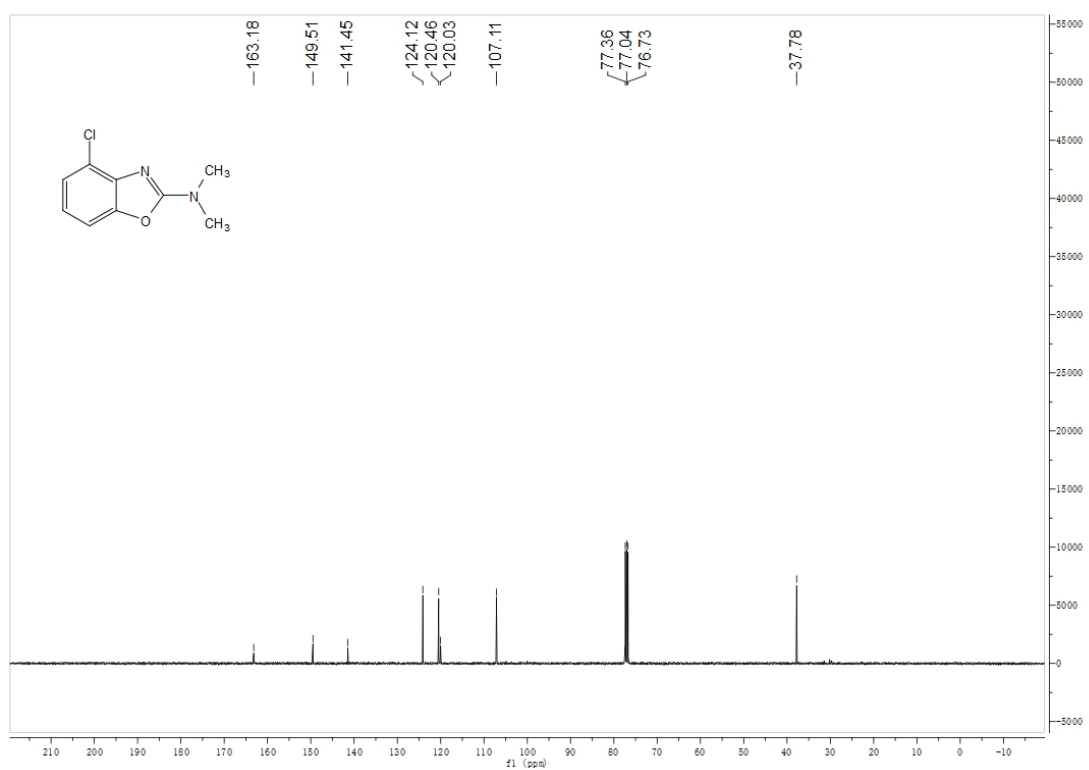

Figure S22. <sup>13</sup>C NMR Spectrum of 3k (100 MHz, CDCl<sub>3</sub>)

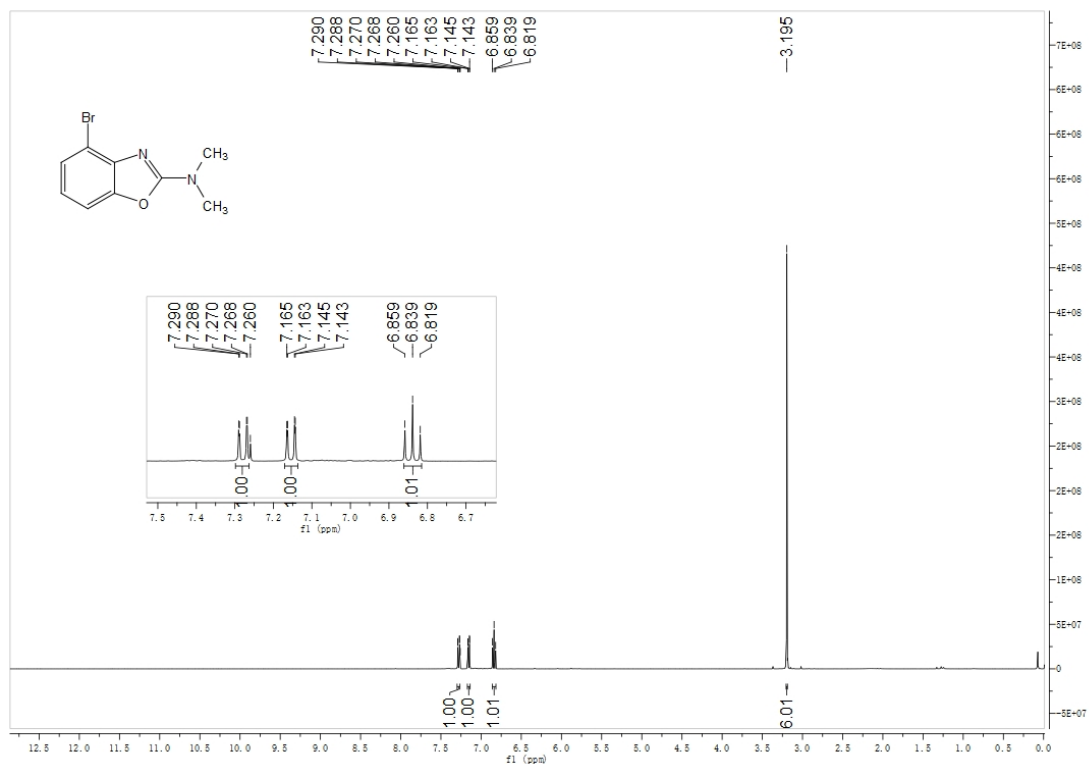

Figure S23. <sup>1</sup>H NMR Spectrum of 3l (400 MHz, CDCl<sub>3</sub>)

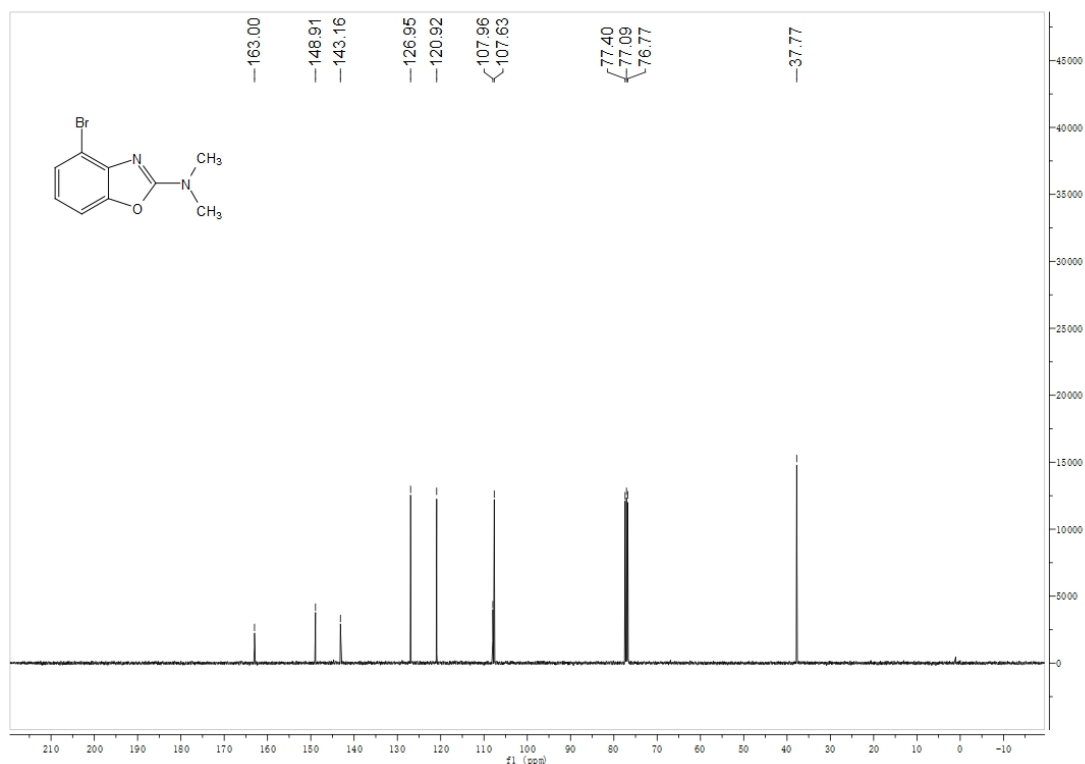

Figure S24. <sup>13</sup>C NMR Spectrum of 3l (100 MHz, CDCl<sub>3</sub>)

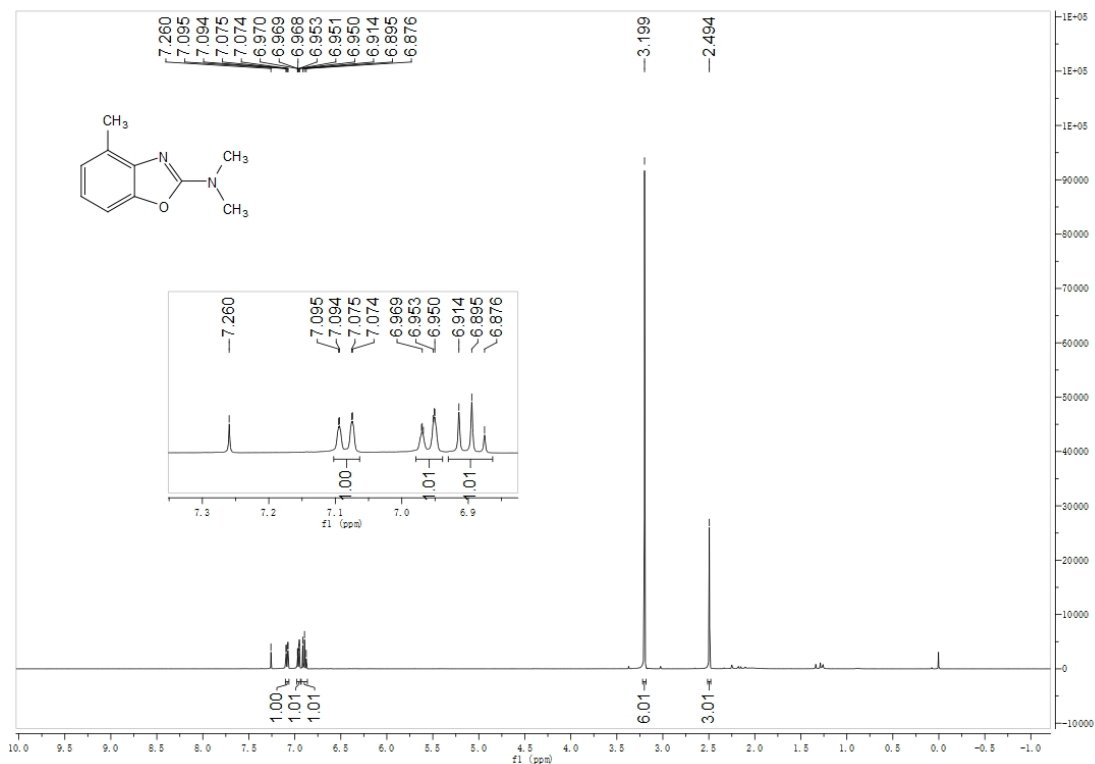

Figure S25.  $^1\text{H}$  NMR Spectrum of 3m (400 MHz,  $\text{CDCl}_3$ )

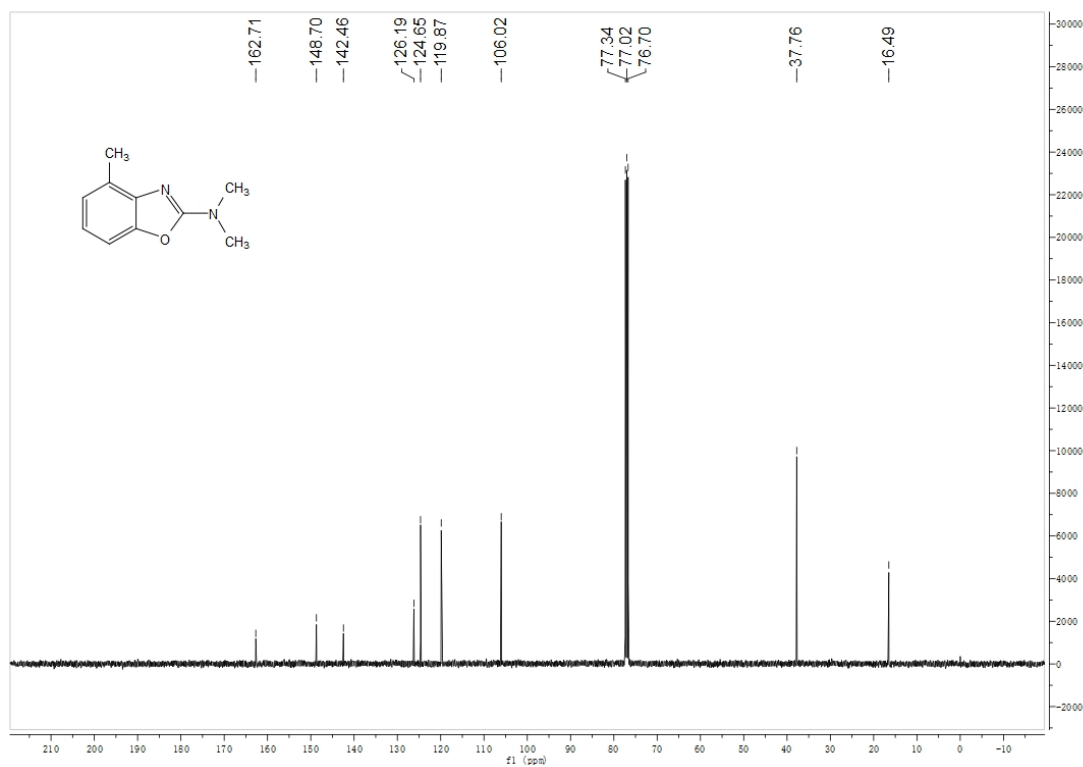

Figure S26.  $^{13}\text{C}$  NMR Spectrum of 3m (100 MHz,  $\text{CDCl}_3$ )

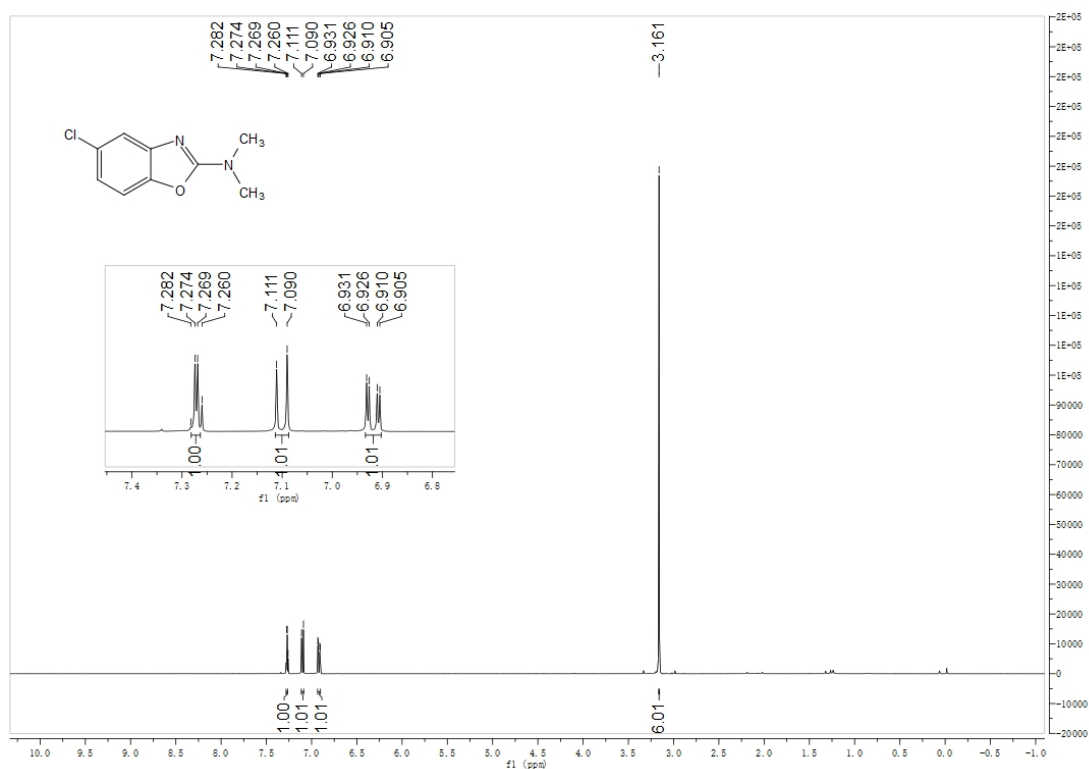

Figure S27. <sup>1</sup>H NMR Spectrum of 3n (400 MHz, CDCl<sub>3</sub>)

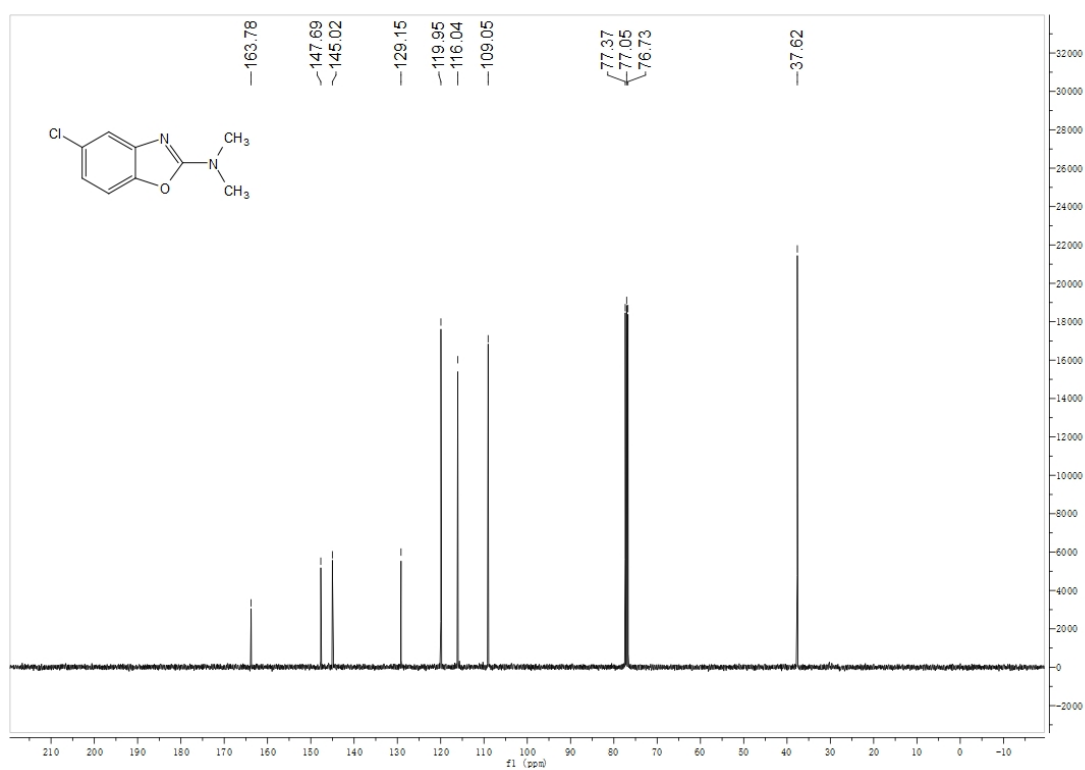

Figure S28. <sup>13</sup>C NMR Spectrum of 3n (100 MHz, CDCl<sub>3</sub>)

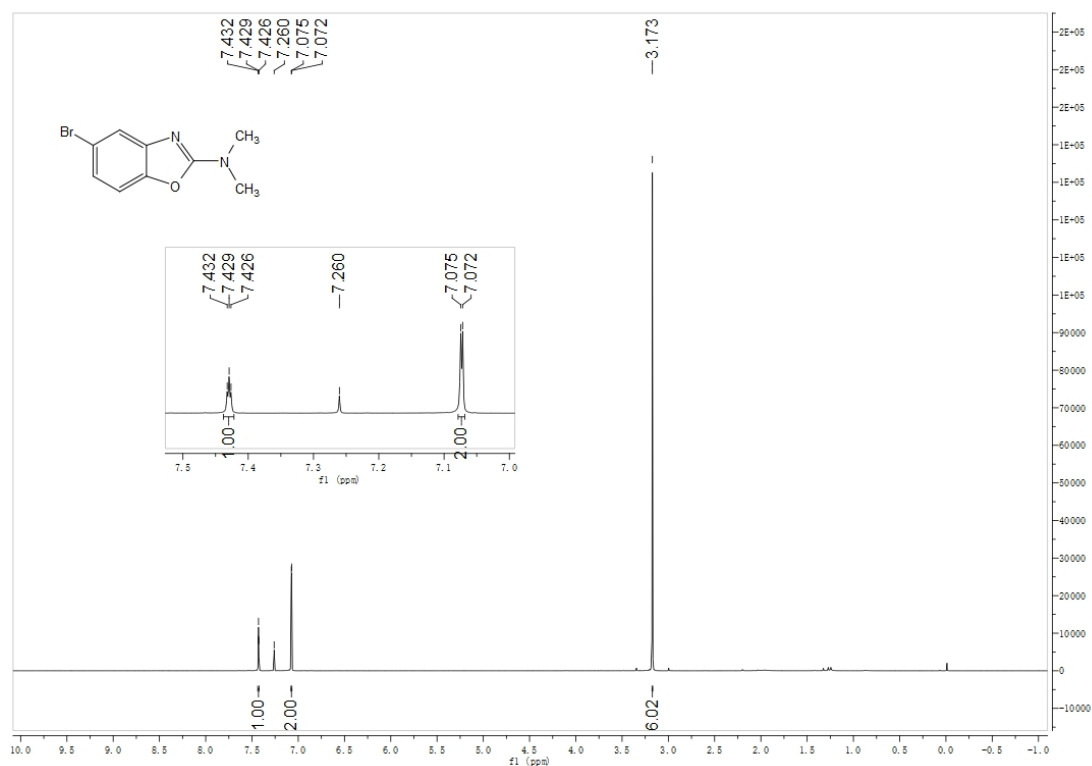

Figure S29.  $^1\text{H}$  NMR Spectrum of 3o (400 MHz,  $\text{CDCl}_3$ )

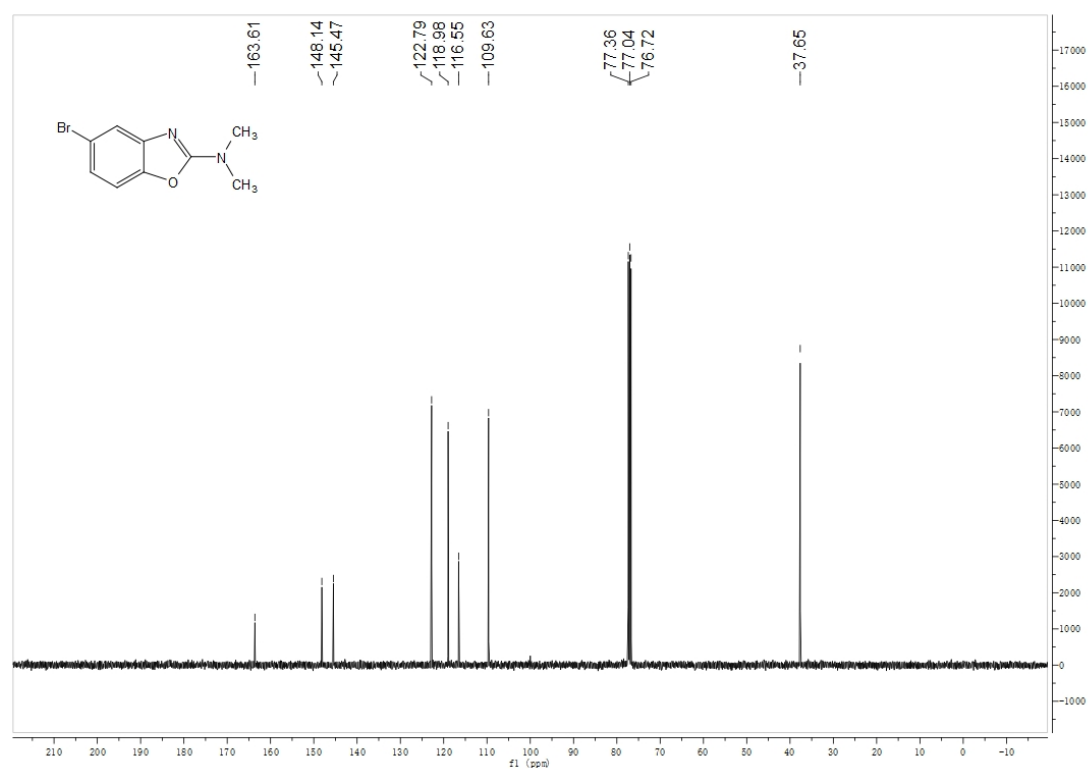

Figure S30.  $^{13}\text{C}$  NMR Spectrum of 3o (100 MHz,  $\text{CDCl}_3$ )

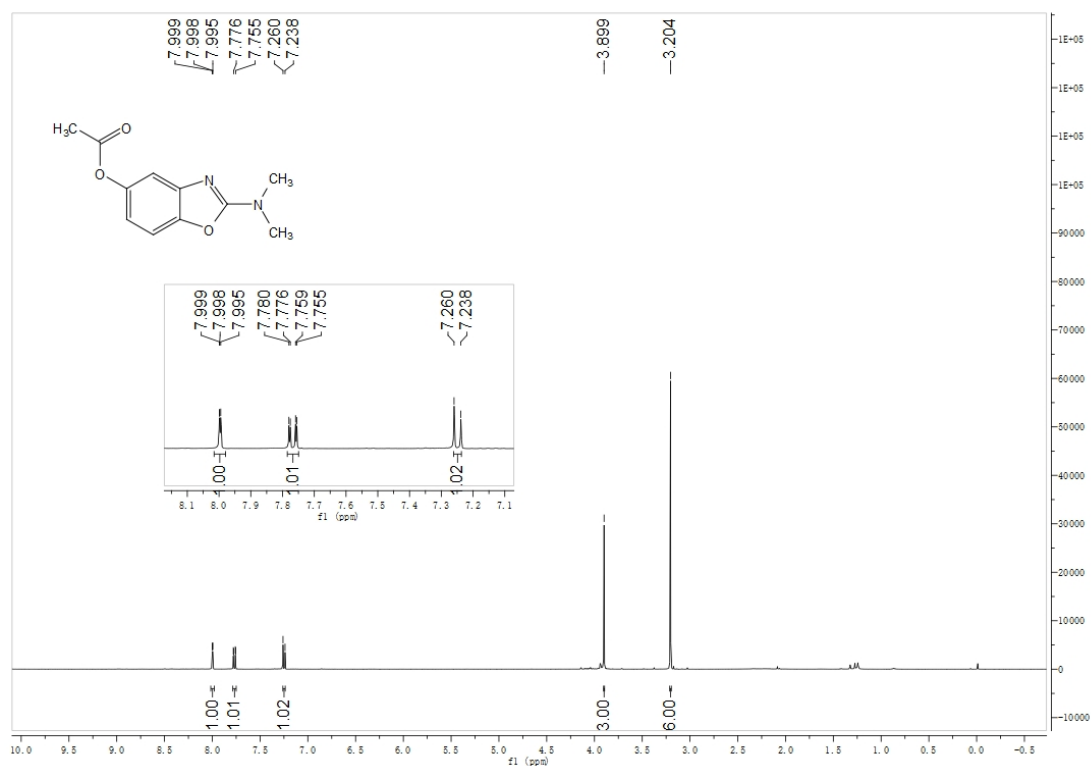

Figure S31.  $^1\text{H}$  NMR Spectrum of 3p (400 MHz,  $\text{CDCl}_3$ )

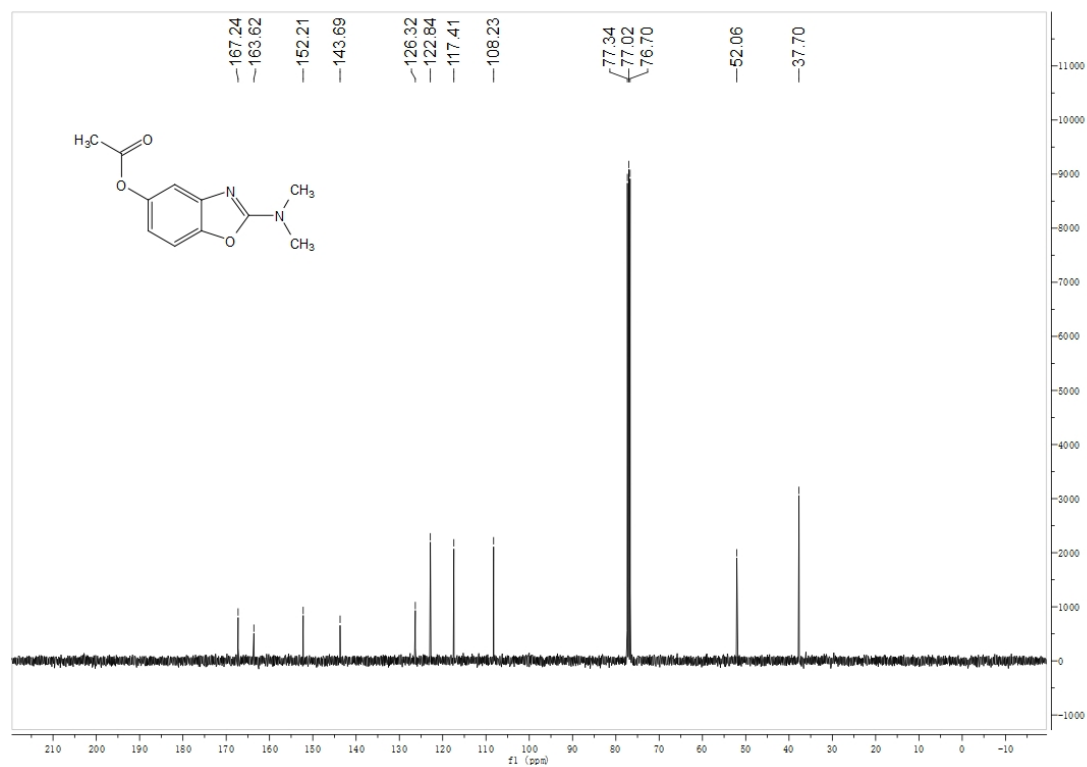

Figure S32.  $^{13}\text{C}$  NMR Spectrum of 3p (100 MHz,  $\text{CDCl}_3$ )

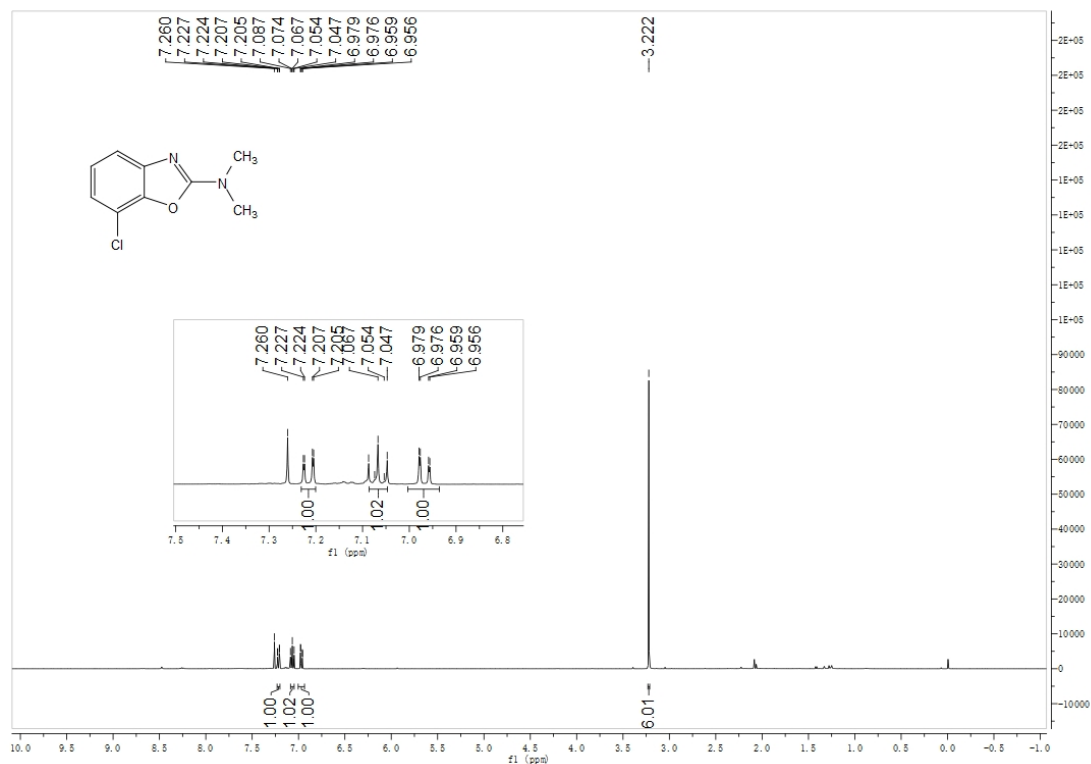

Figure S33. <sup>1</sup>H NMR Spectrum of 3q (400 MHz, CDCl<sub>3</sub>)

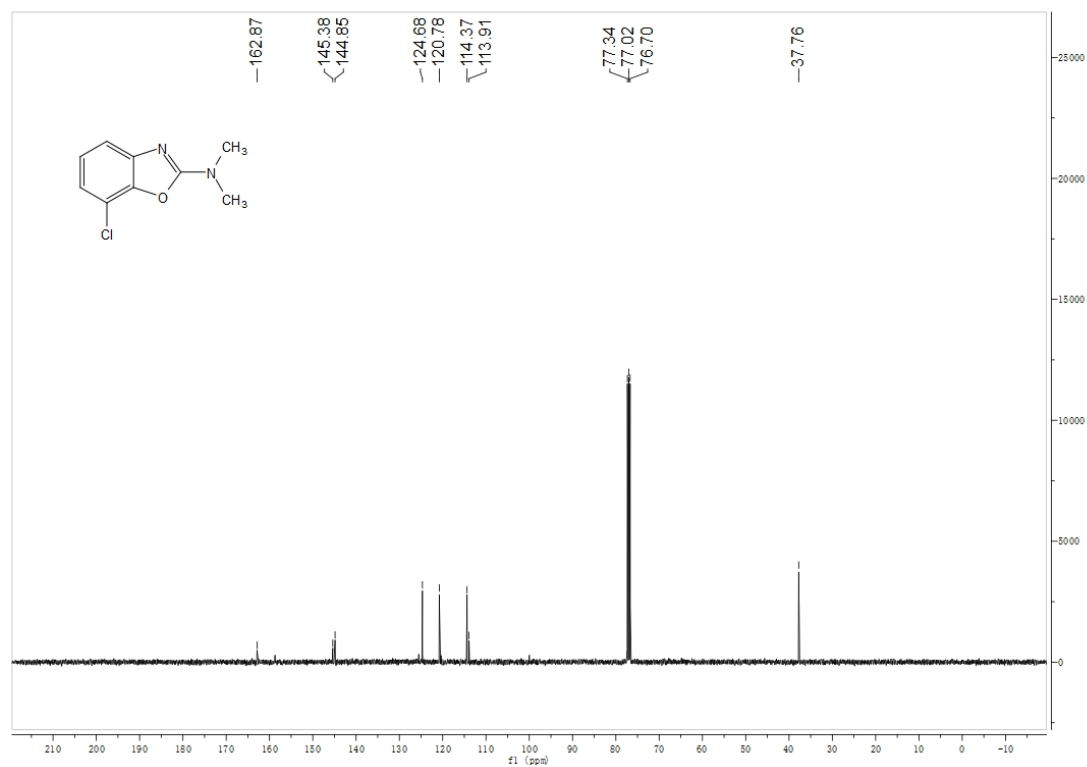

Figure S34. <sup>13</sup>C NMR Spectrum of 3q (100 MHz, CDCl<sub>3</sub>)

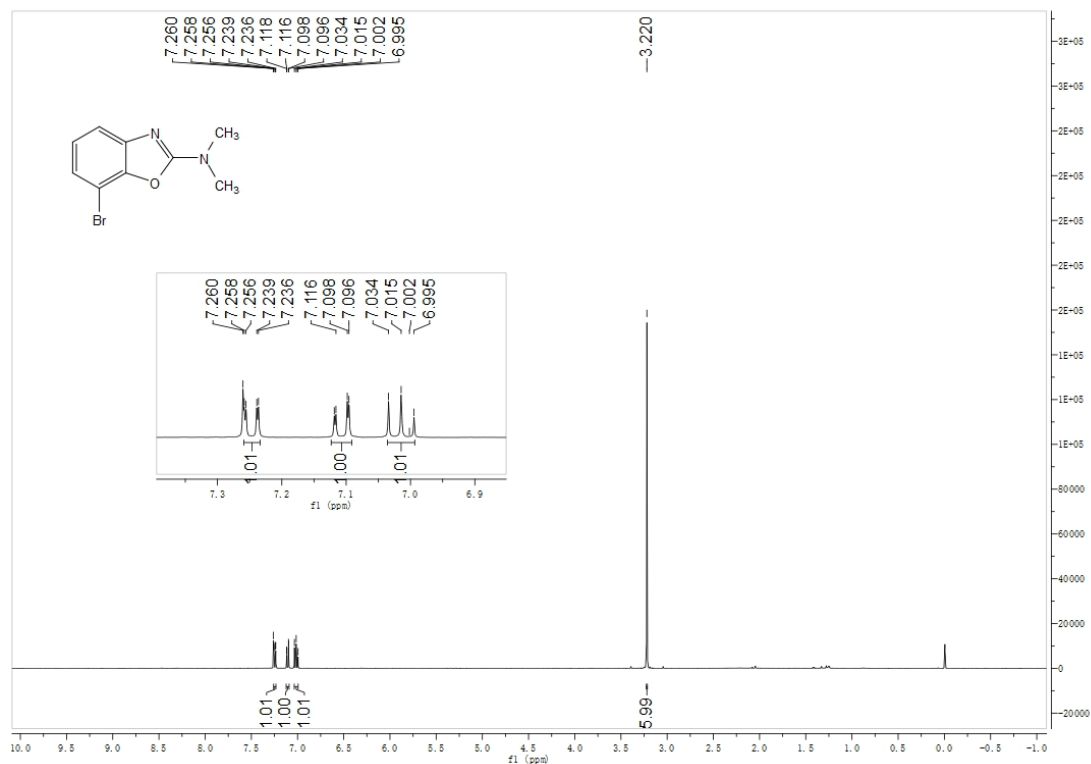

Figure S35. <sup>1</sup>H NMR Spectrum of 3r (400 MHz, CDCl<sub>3</sub>)

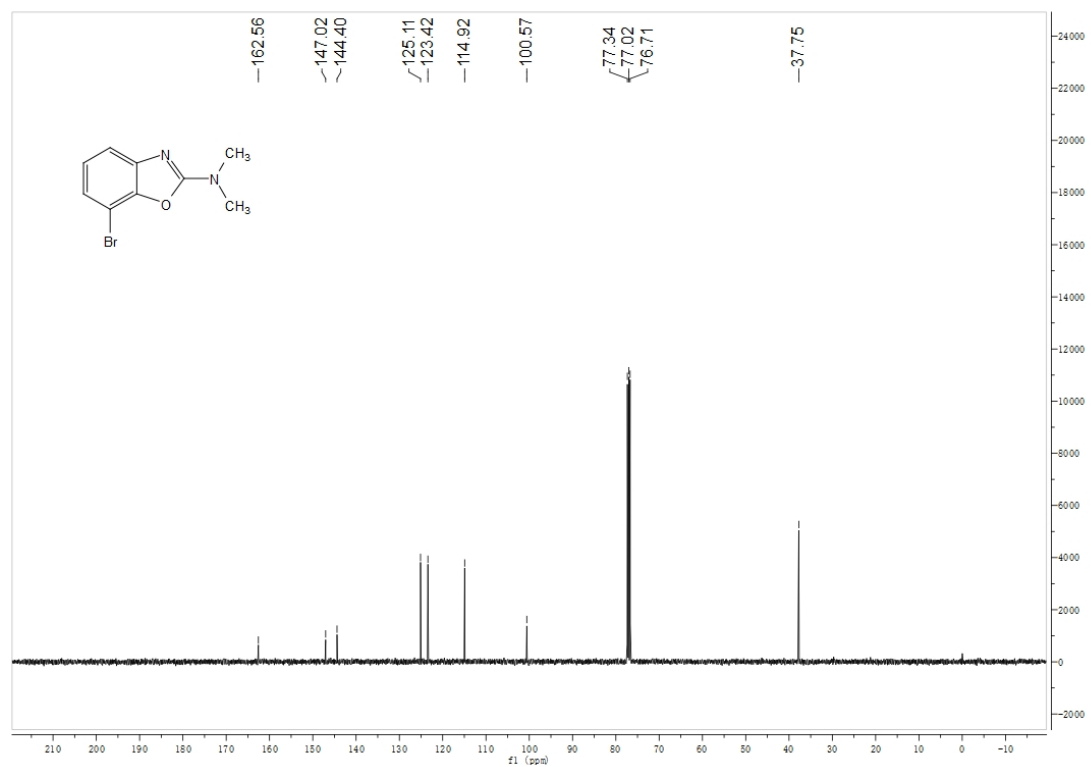

Figure S36. <sup>13</sup>C NMR Spectrum of 3r (100 MHz, CDCl<sub>3</sub>)



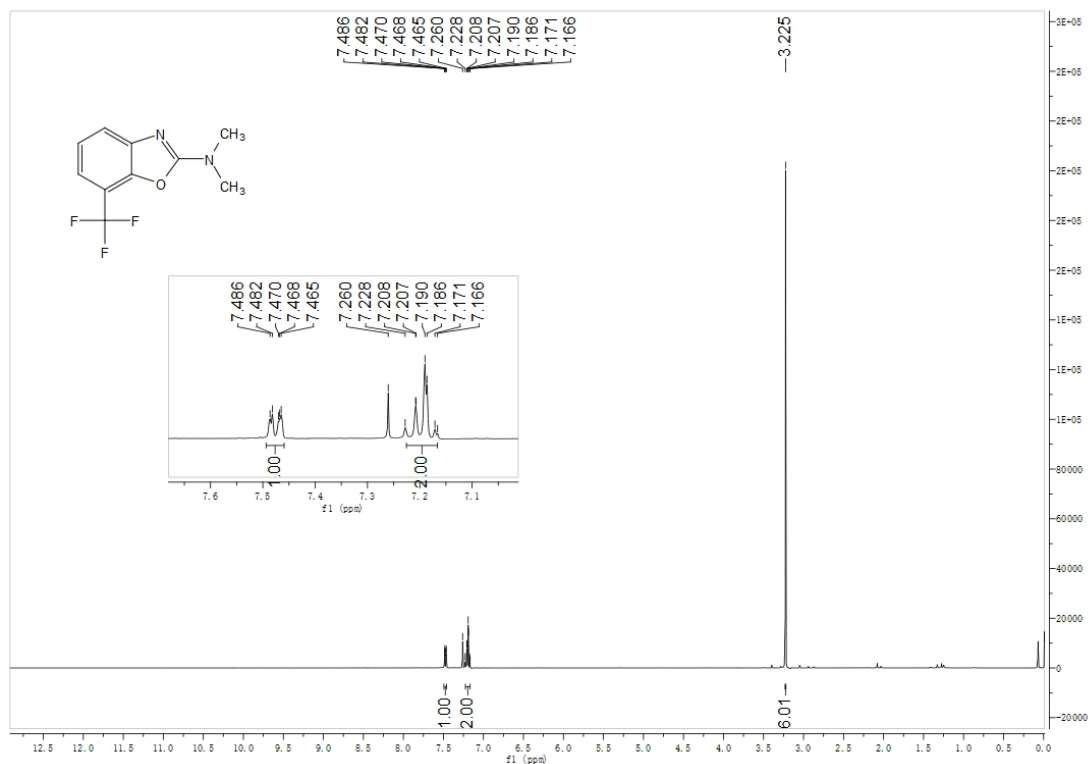

Figure S37. <sup>1</sup>H NMR Spectrum of 3s (400 MHz, CDCl<sub>3</sub>)

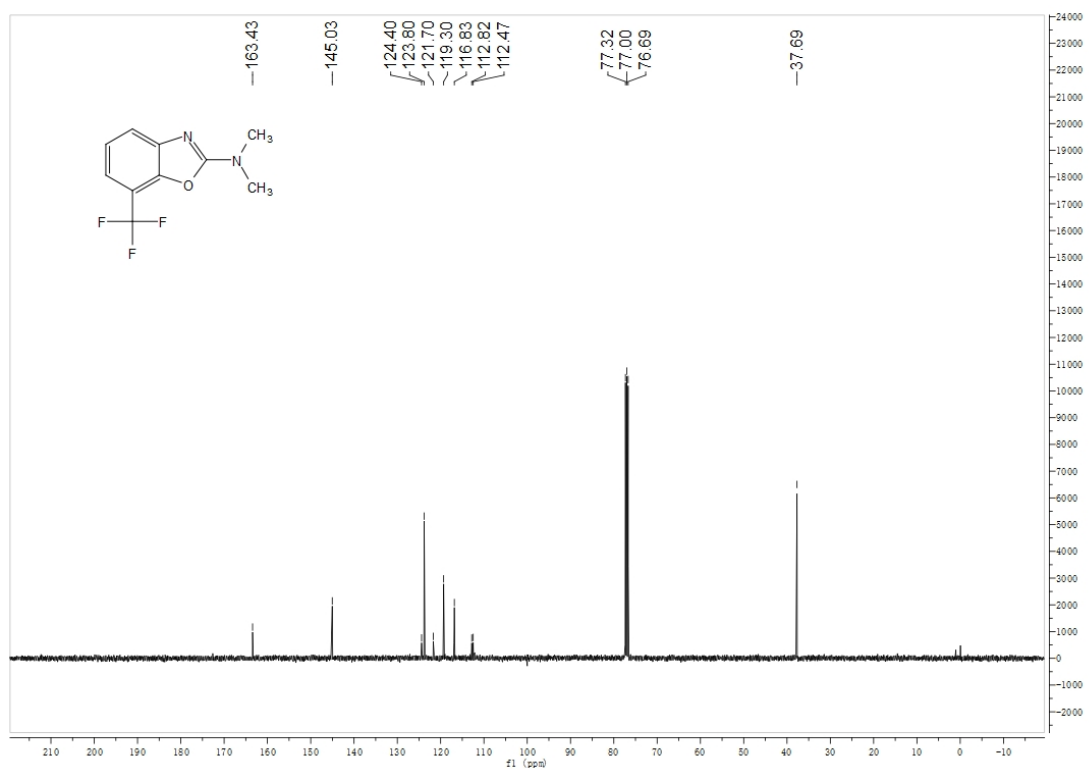

Figure S38. <sup>13</sup>C NMR Spectrum of 3s (100 MHz, CDCl<sub>3</sub>)

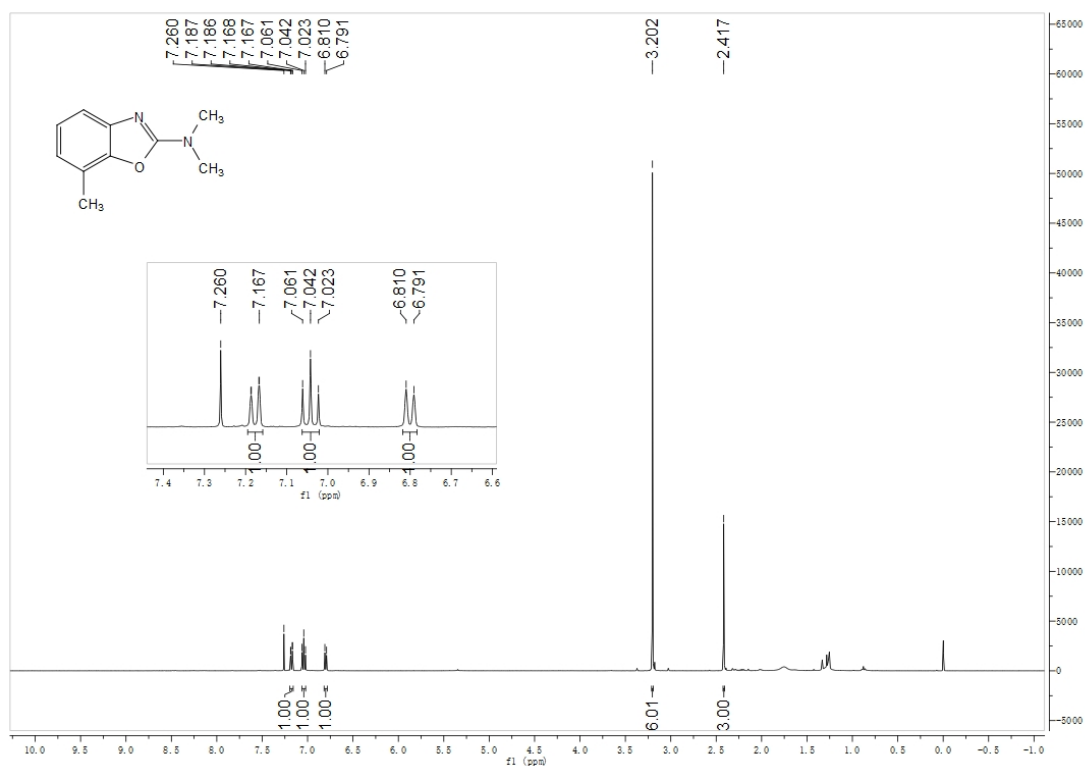

Figure S39. <sup>1</sup>H NMR Spectrum of 3t (400 MHz, CDCl<sub>3</sub>)

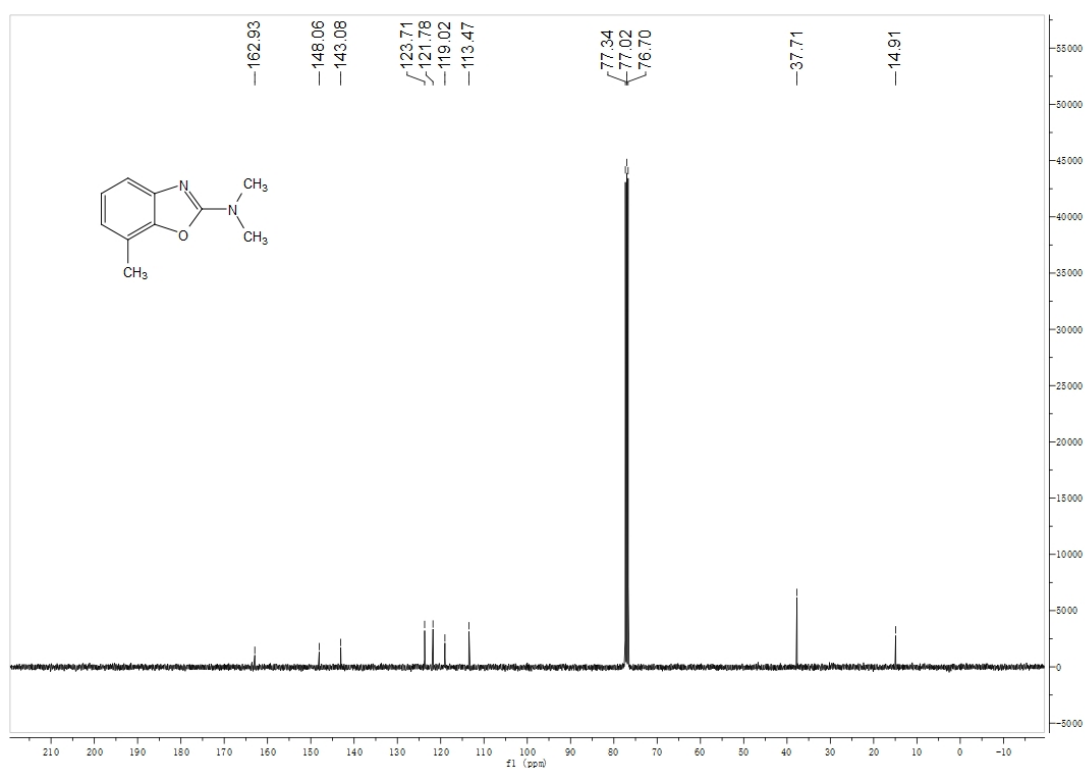

Figure S40. <sup>13</sup>C NMR Spectrum of 3t (100 MHz, CDCl<sub>3</sub>)

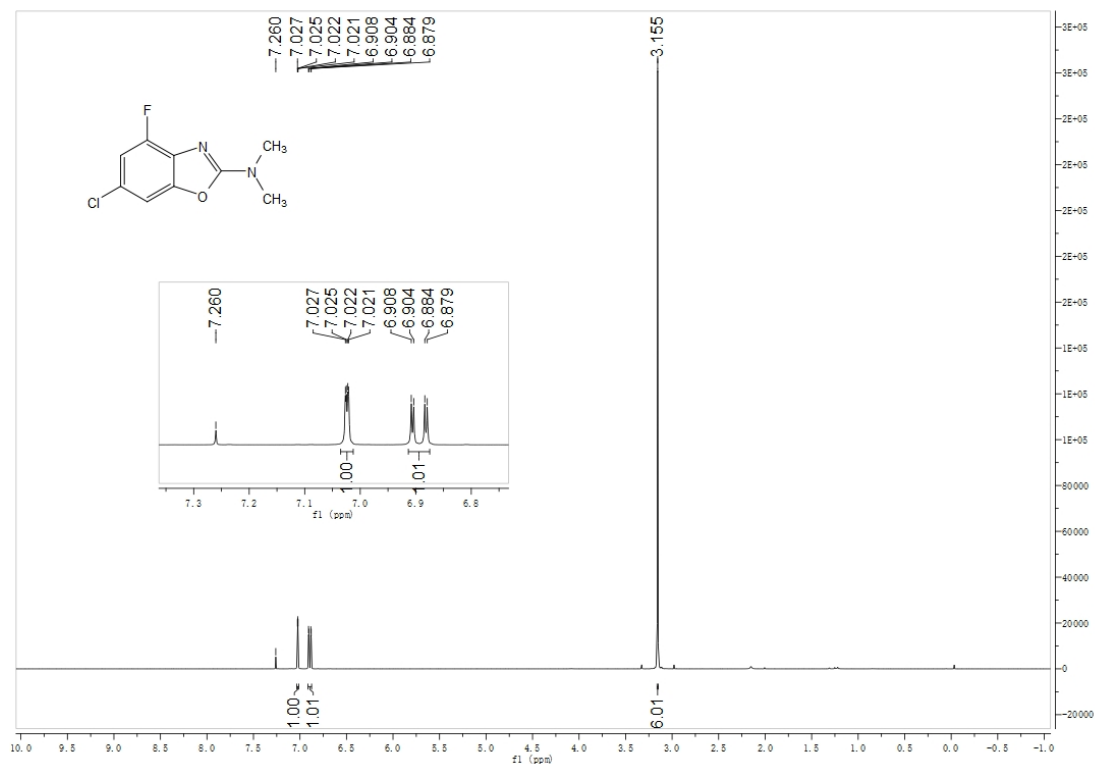

Figure S41.  $^1\text{H}$  NMR Spectrum of 3u (400 MHz,  $\text{CDCl}_3$ )

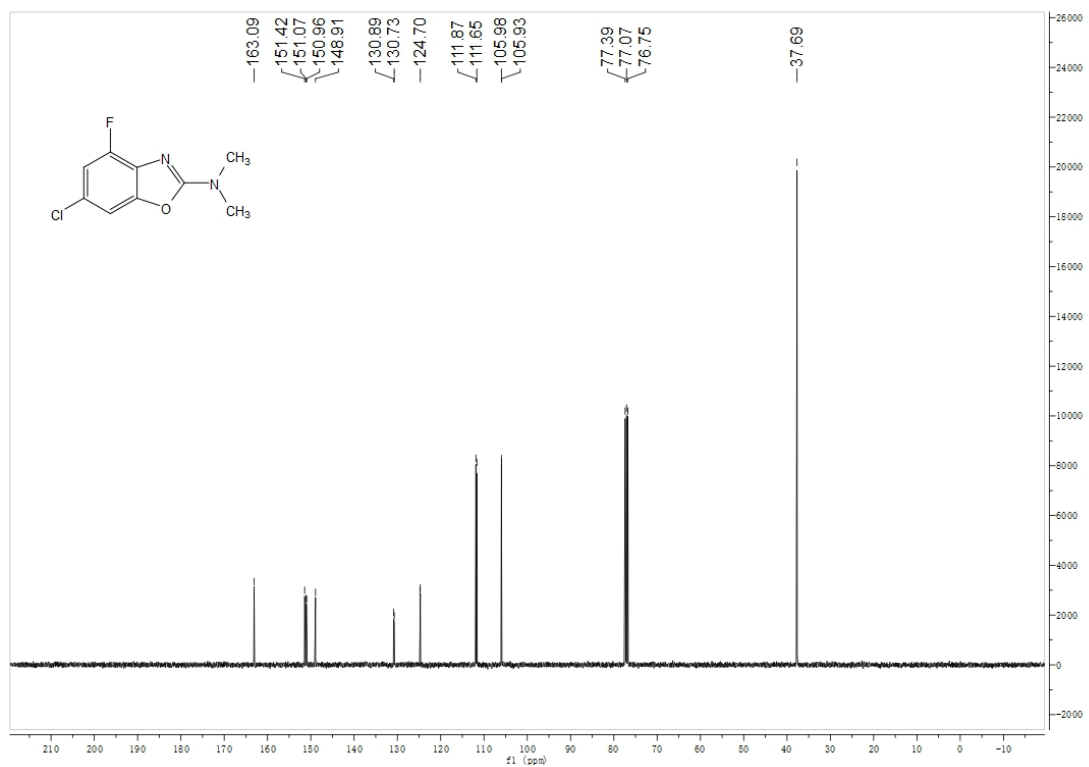

Figure S42.  $^{13}\text{C}$  NMR Spectrum of 3u (100 MHz,  $\text{CDCl}_3$ )

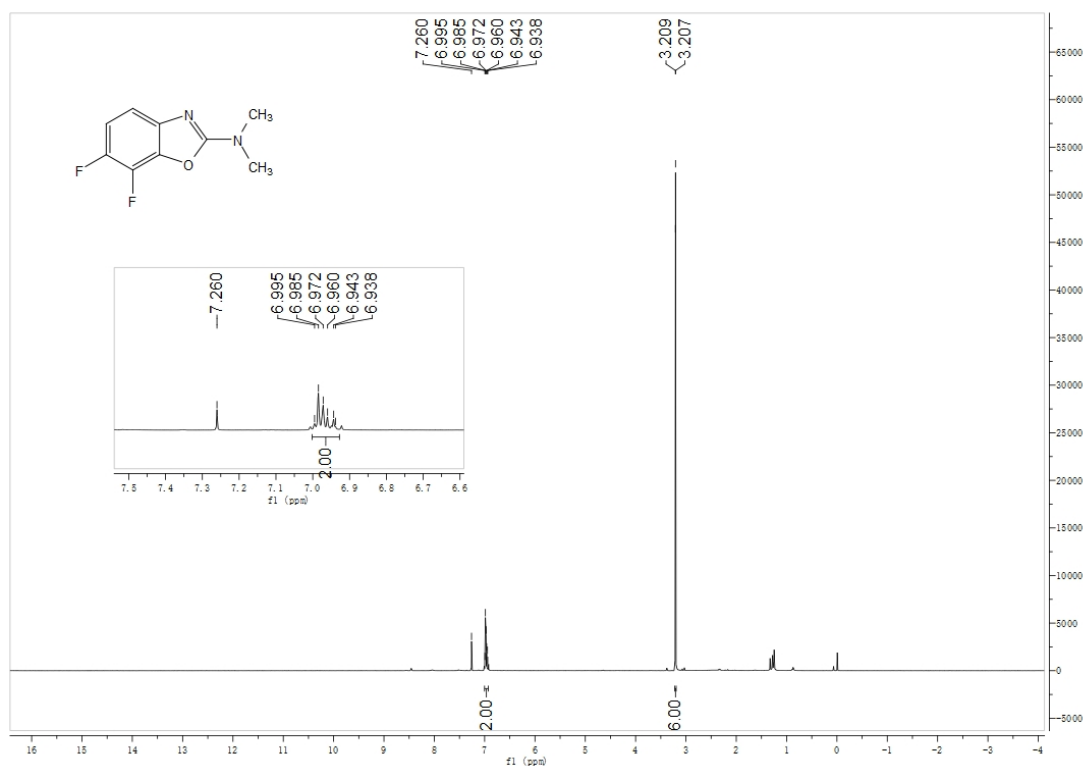

Figure S43.  $^1\text{H}$  NMR Spectrum of 3v (400 MHz,  $\text{CDCl}_3$ )

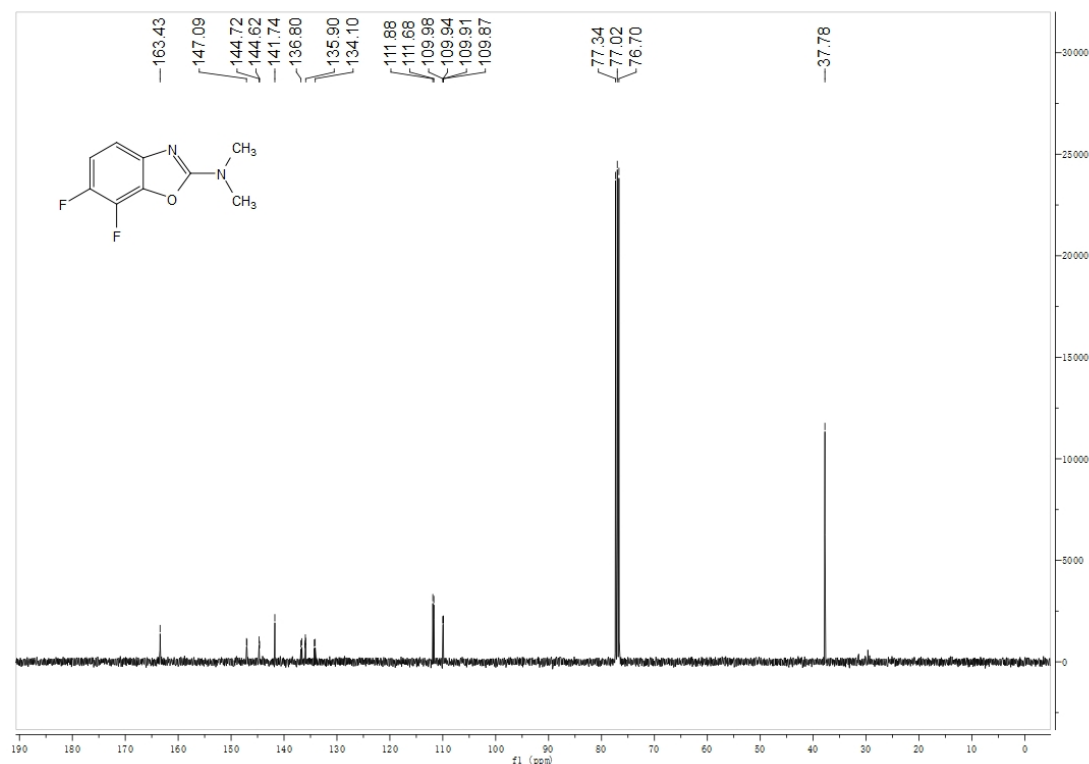

Figure S44.  $^{13}\text{C}$  NMR Spectrum of 3v (100 MHz,  $\text{CDCl}_3$ )

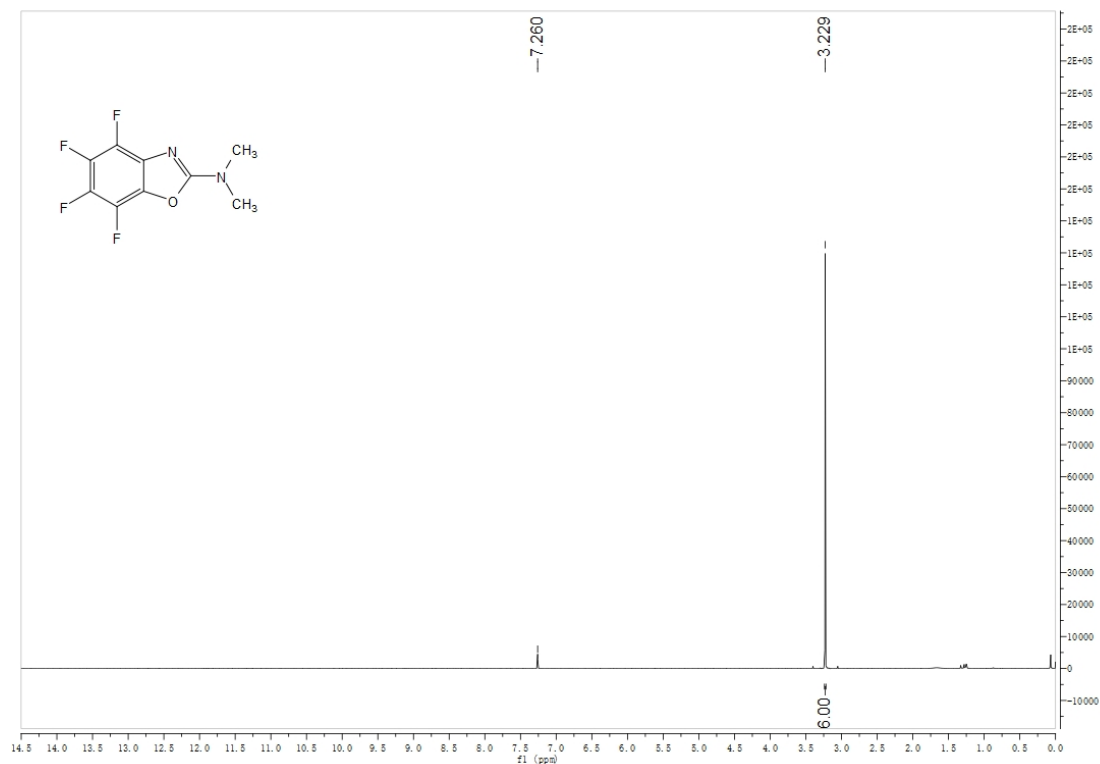

Figure S45.  $^1\text{H}$  NMR Spectrum of 3w (400 MHz,  $\text{CDCl}_3$ )

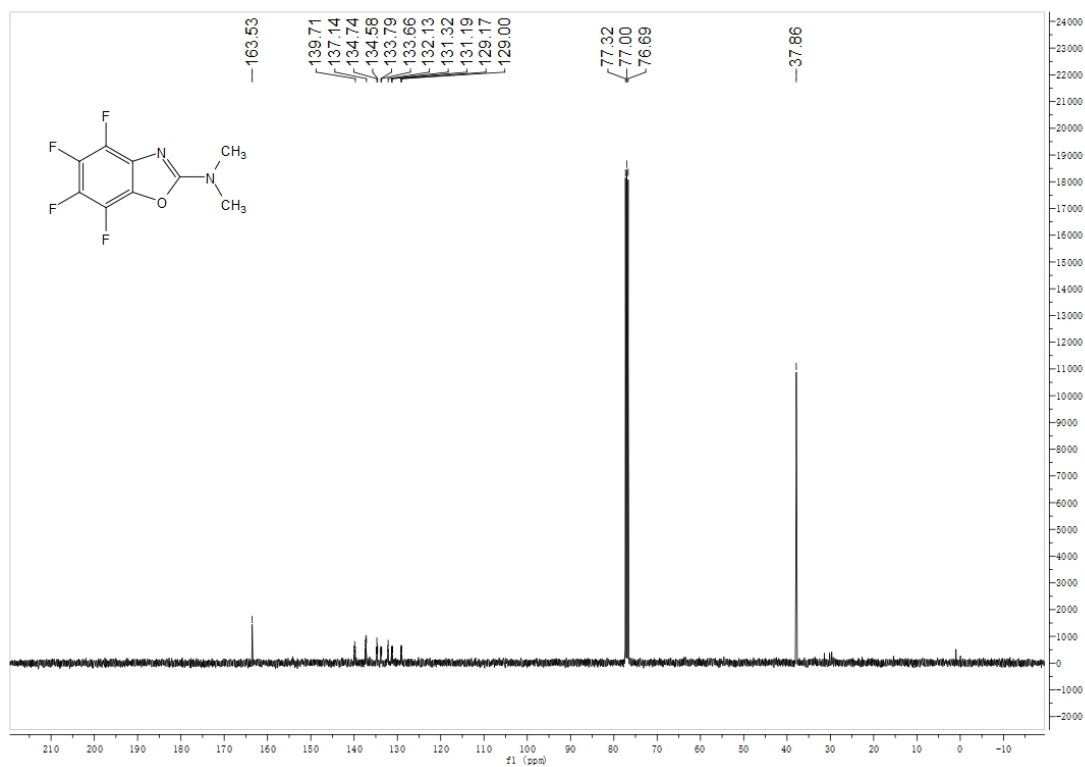

Figure S46.  $^{13}\text{C}$  NMR Spectrum of 3w (100 MHz,  $\text{CDCl}_3$ )

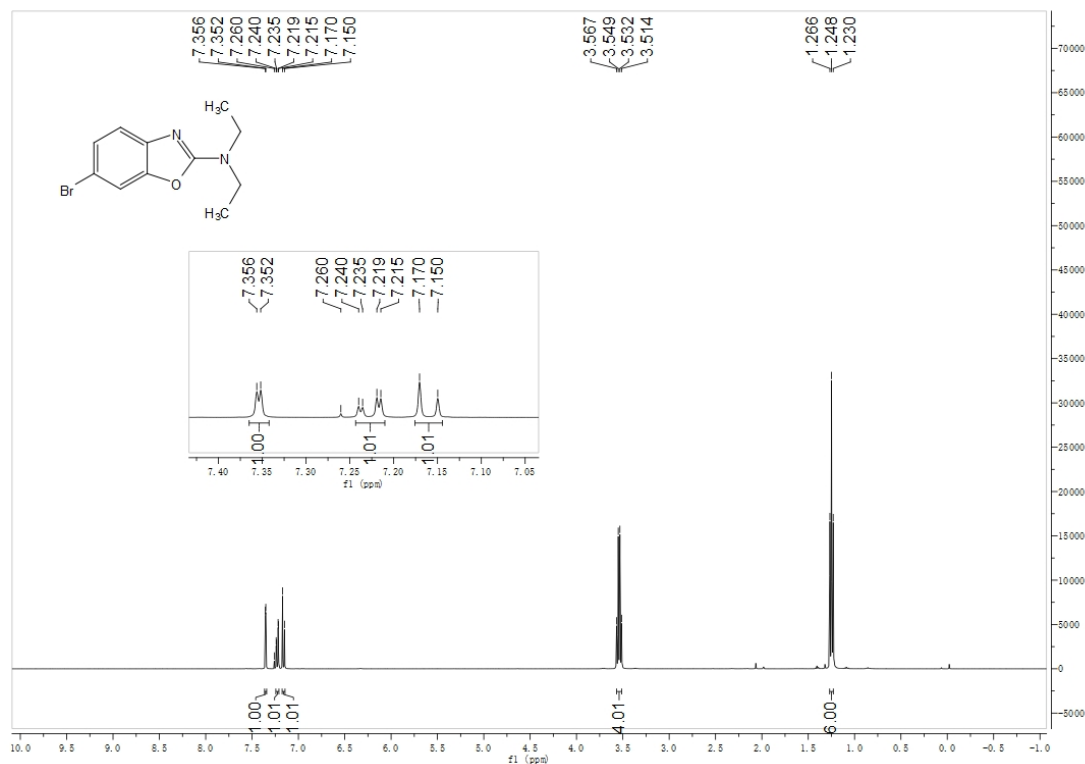

Figure S47. <sup>1</sup>H NMR Spectrum of 4a (400 MHz, CDCl<sub>3</sub>)

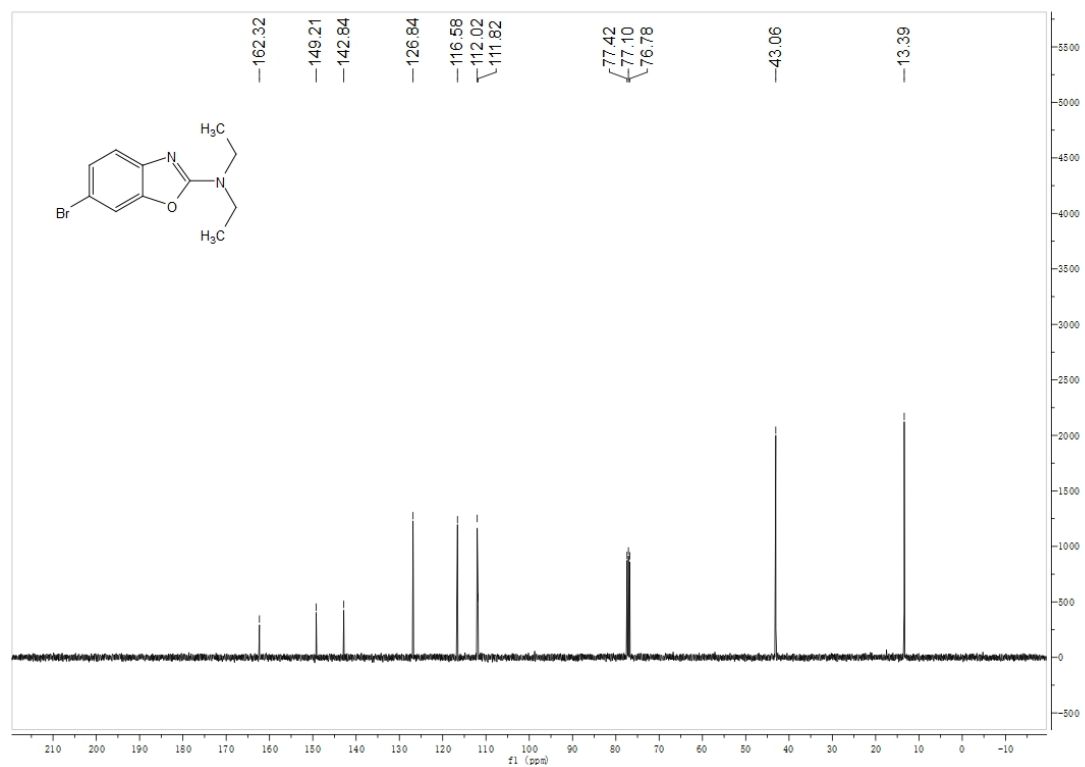

Figure S48. <sup>13</sup>C NMR Spectrum of 4a (100 MHz, CDCl<sub>3</sub>)

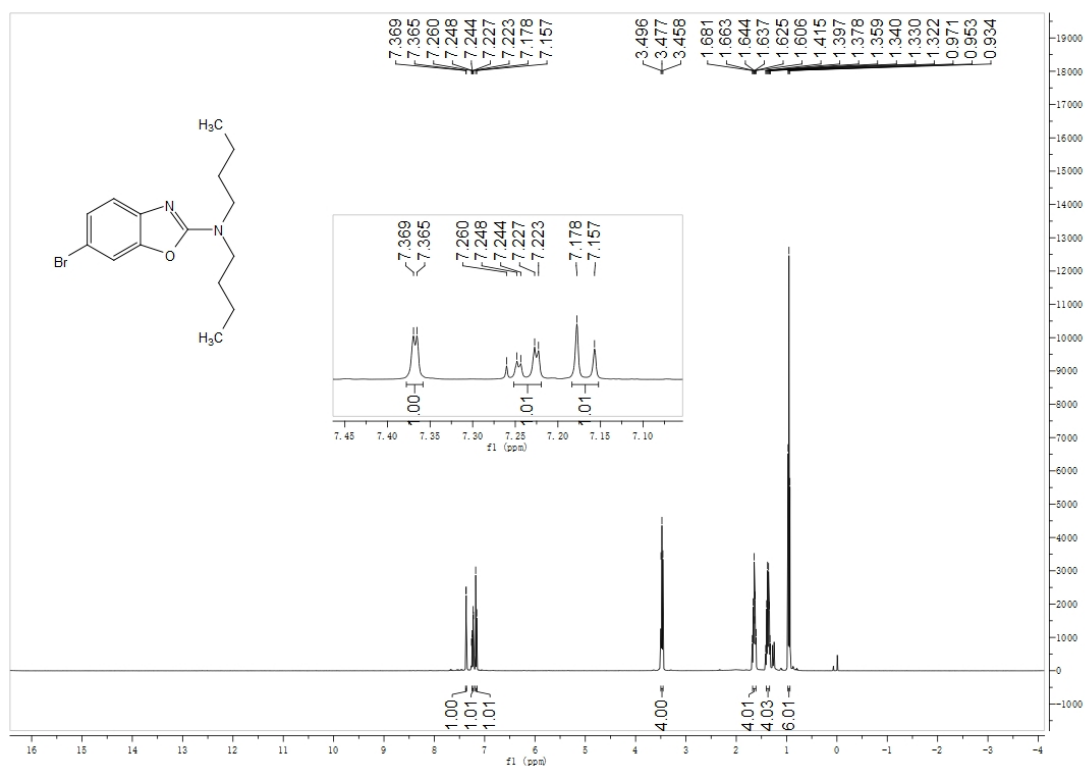

Figure S49. <sup>1</sup>H NMR Spectrum of 4b (400 MHz, CDCl<sub>3</sub>)

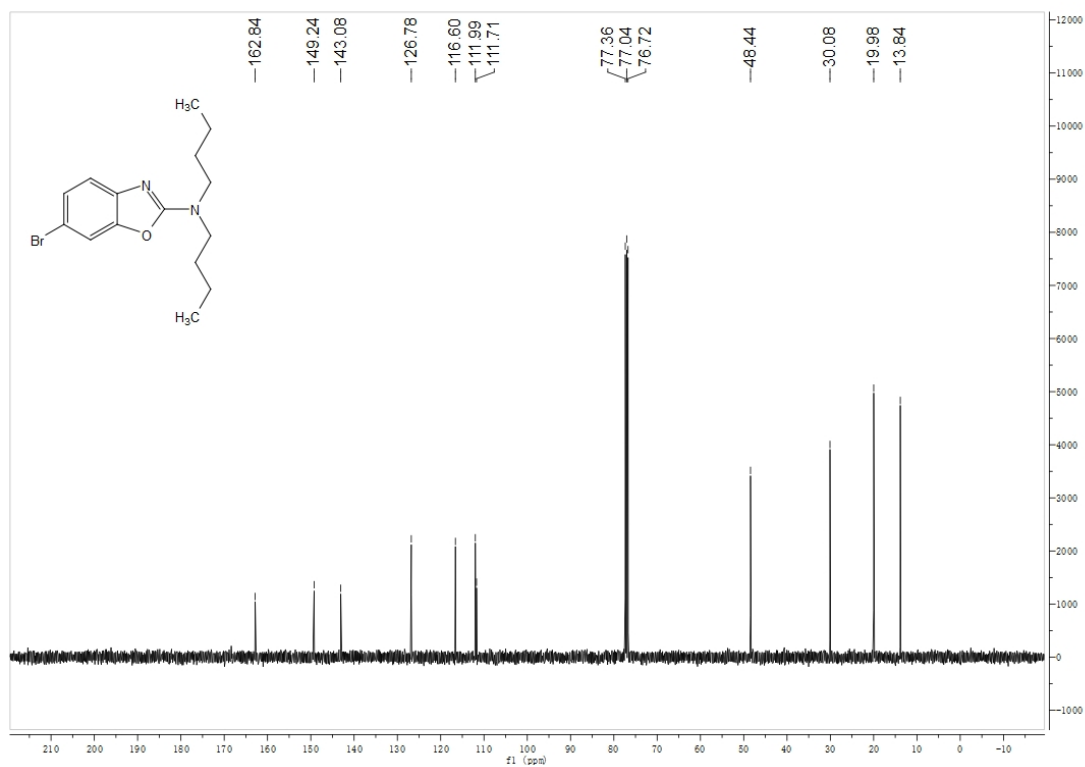

Figure S50. <sup>13</sup>C NMR Spectrum of 4b (100 MHz, CDCl<sub>3</sub>)

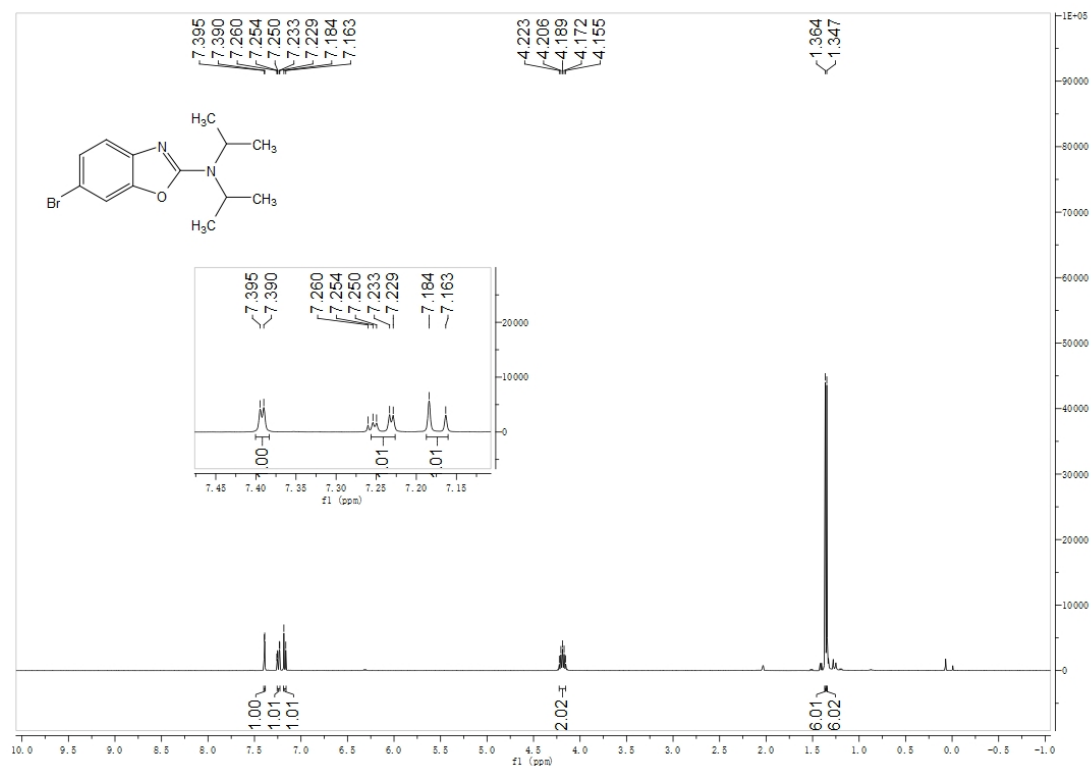

Figure S51. <sup>1</sup>H NMR Spectrum of 4c (400 MHz, CDCl<sub>3</sub>)

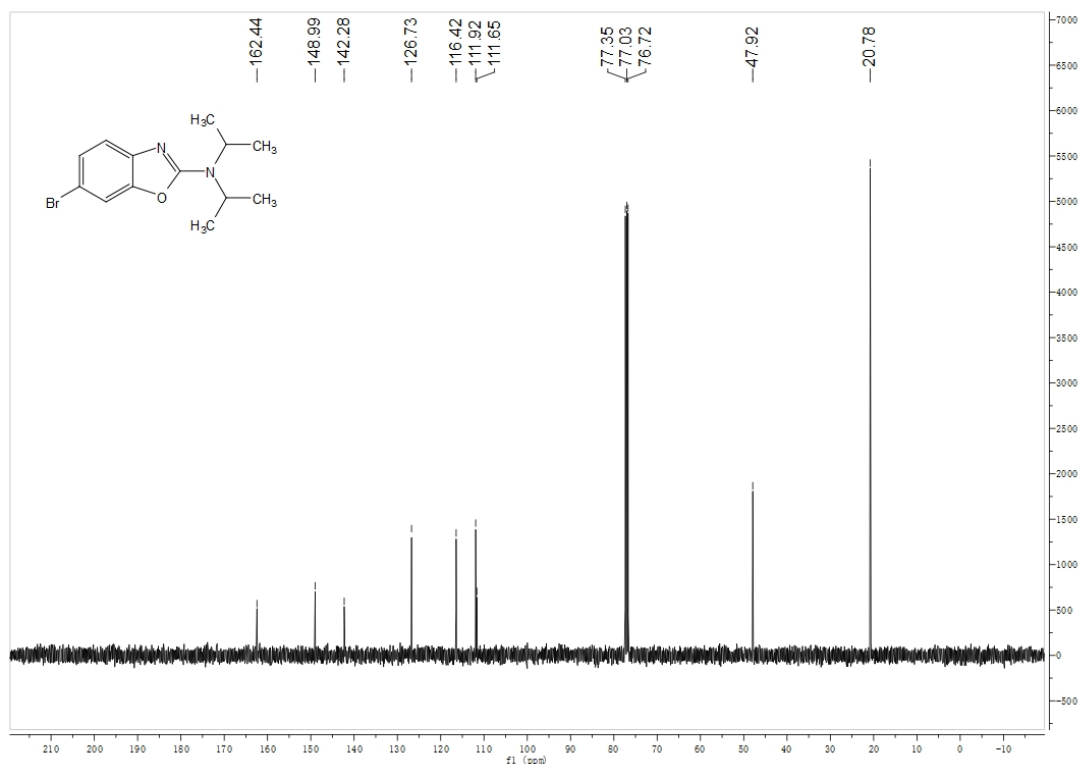

Figure S52. <sup>13</sup>C NMR Spectrum of 4c (100 MHz, CDCl<sub>3</sub>)



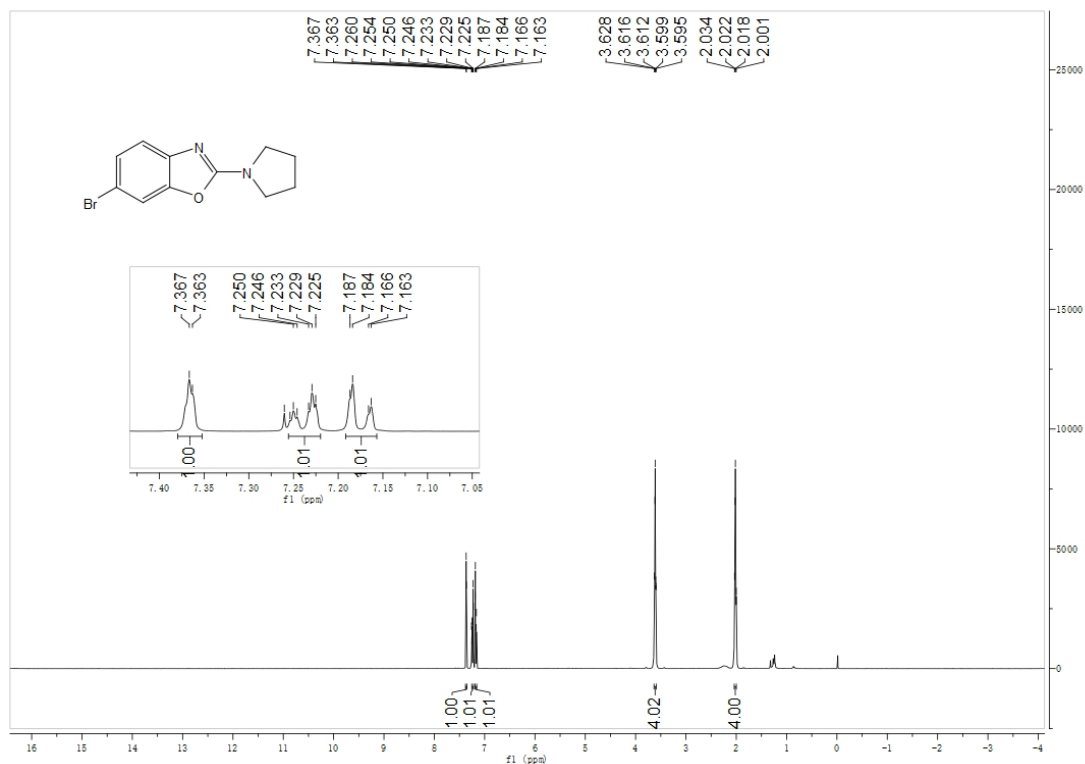

Figure S53. <sup>1</sup>H NMR Spectrum of 4d (400 MHz, CDCl<sub>3</sub>)

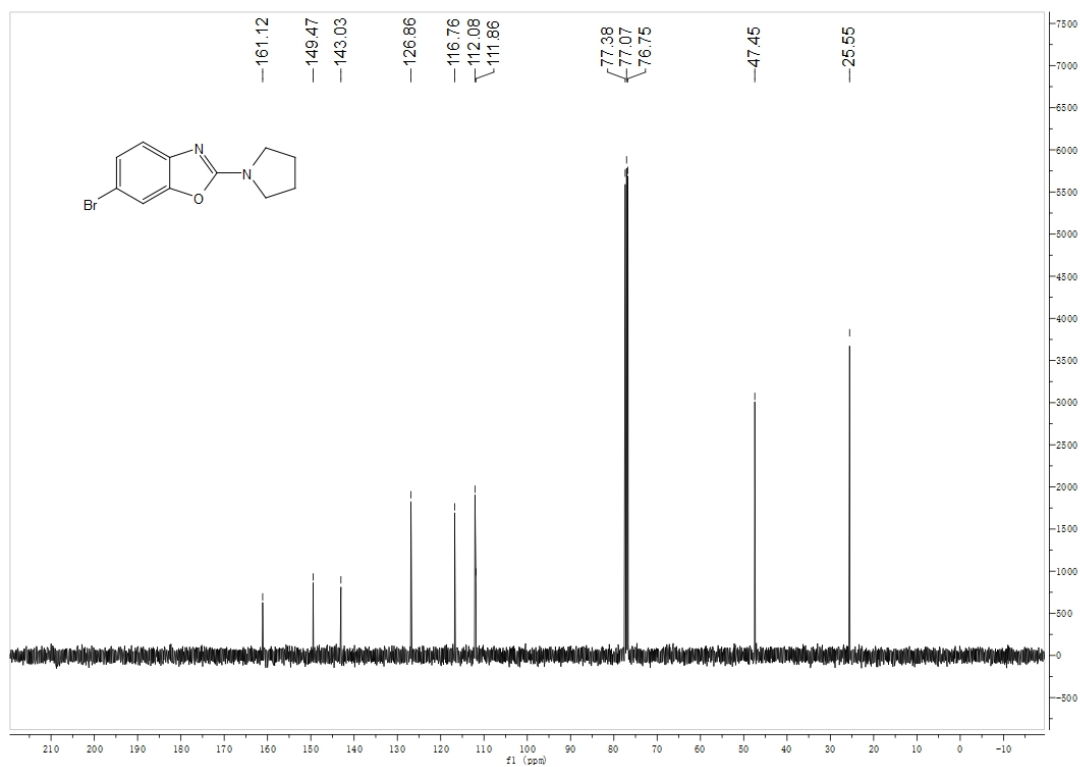

Figure S54. <sup>13</sup>C NMR Spectrum of 4d (100 MHz, CDCl<sub>3</sub>)

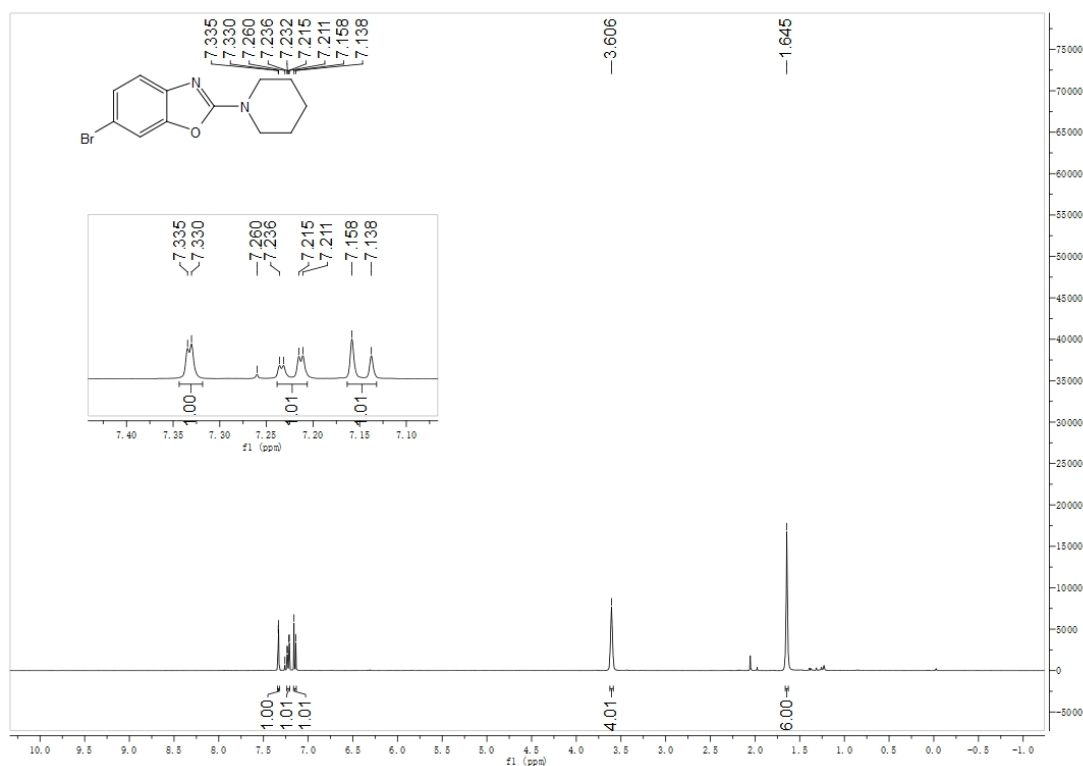

Figure S55. <sup>1</sup>H NMR Spectrum of 4e (400 MHz, CDCl<sub>3</sub>)

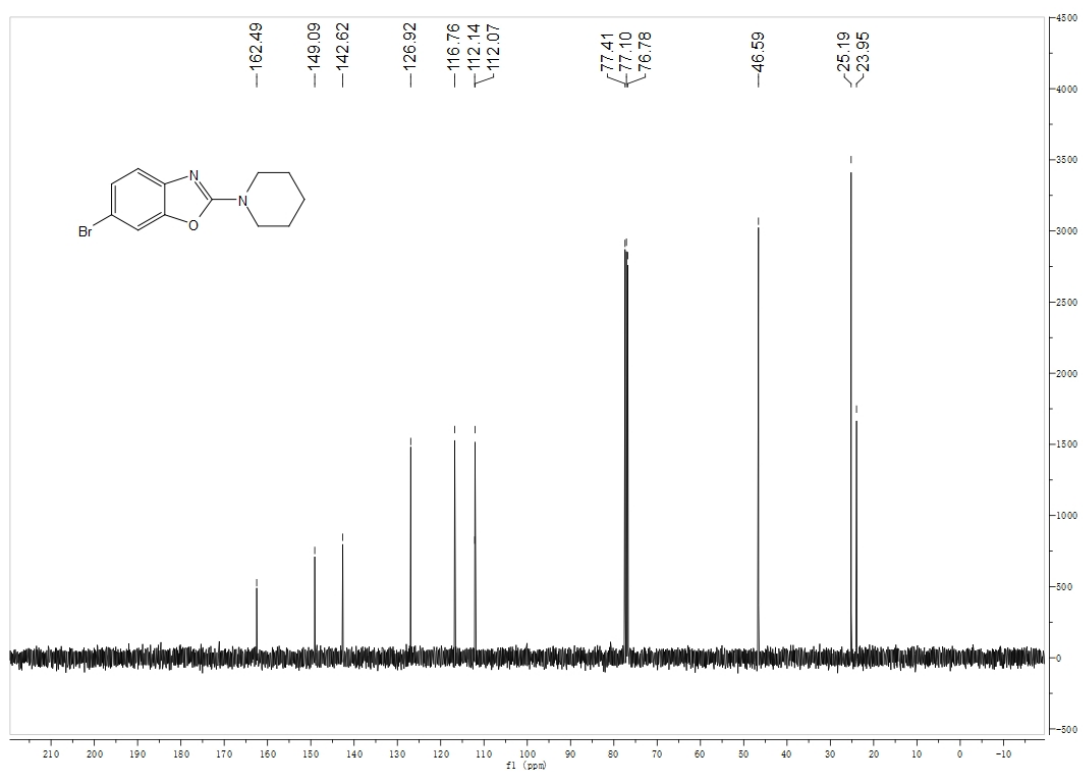

Figure S56. <sup>13</sup>C NMR Spectrum of 4e (100 MHz, CDCl<sub>3</sub>)

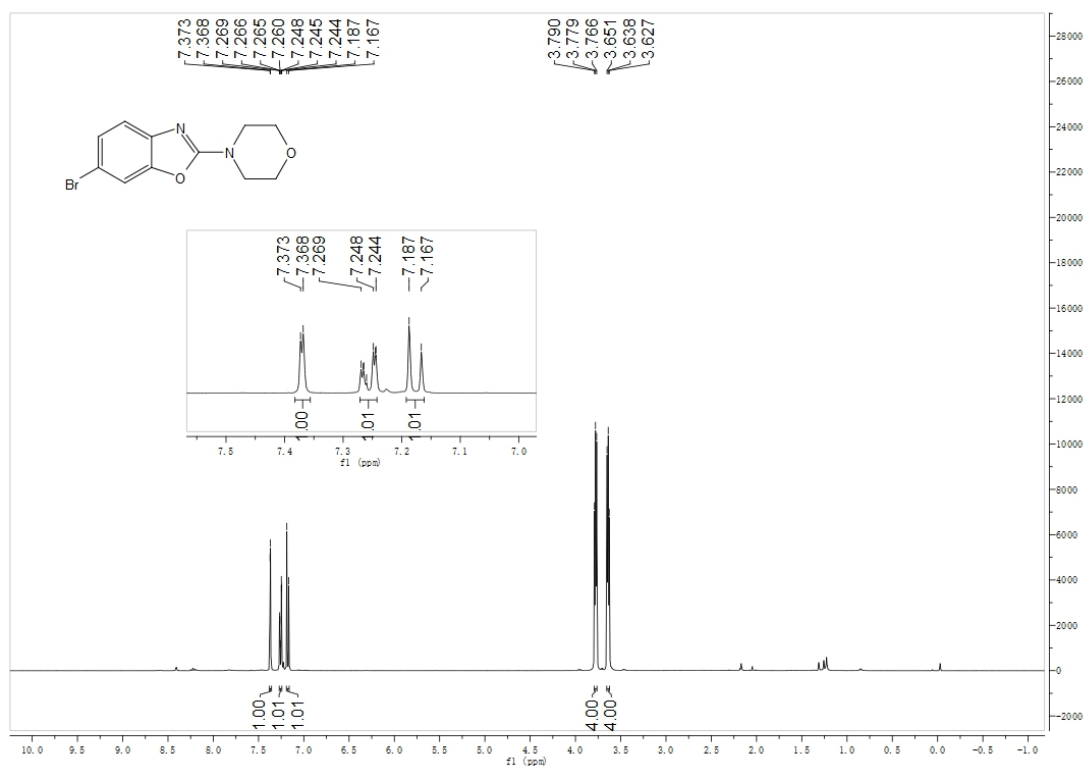

Figure S57. <sup>1</sup>H NMR Spectrum of 4f (400 MHz, CDCl<sub>3</sub>)

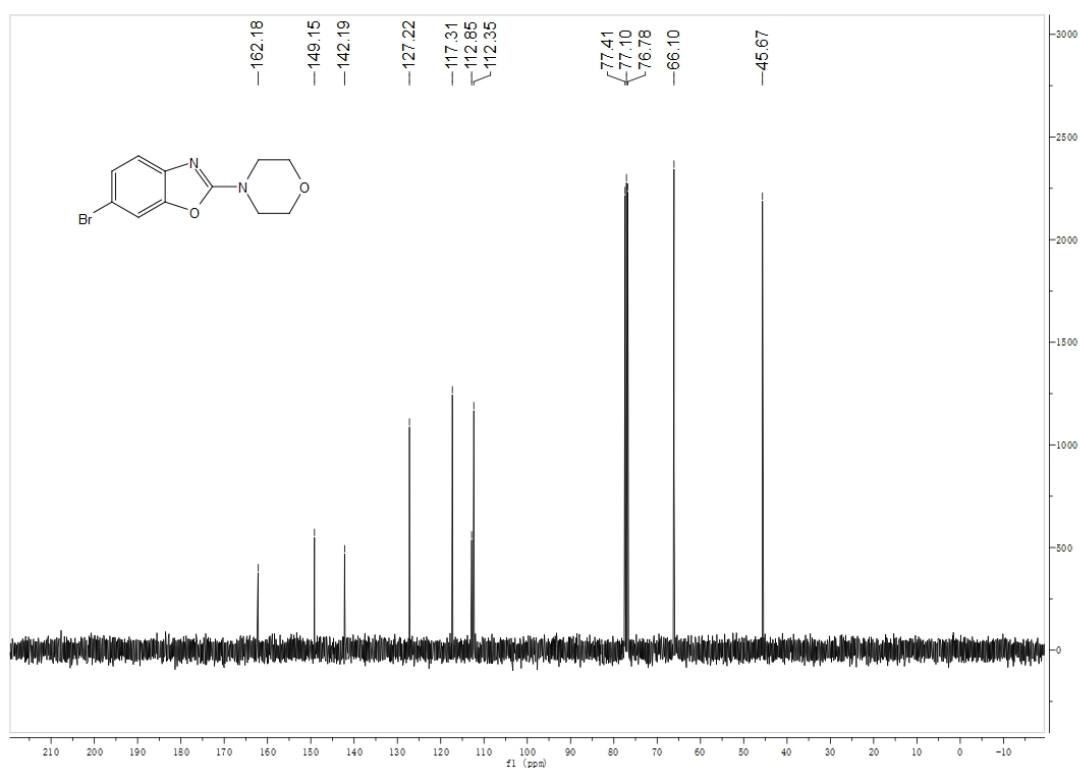

Figure S58. <sup>13</sup>C NMR Spectrum of 4f (100 MHz, CDCl<sub>3</sub>)

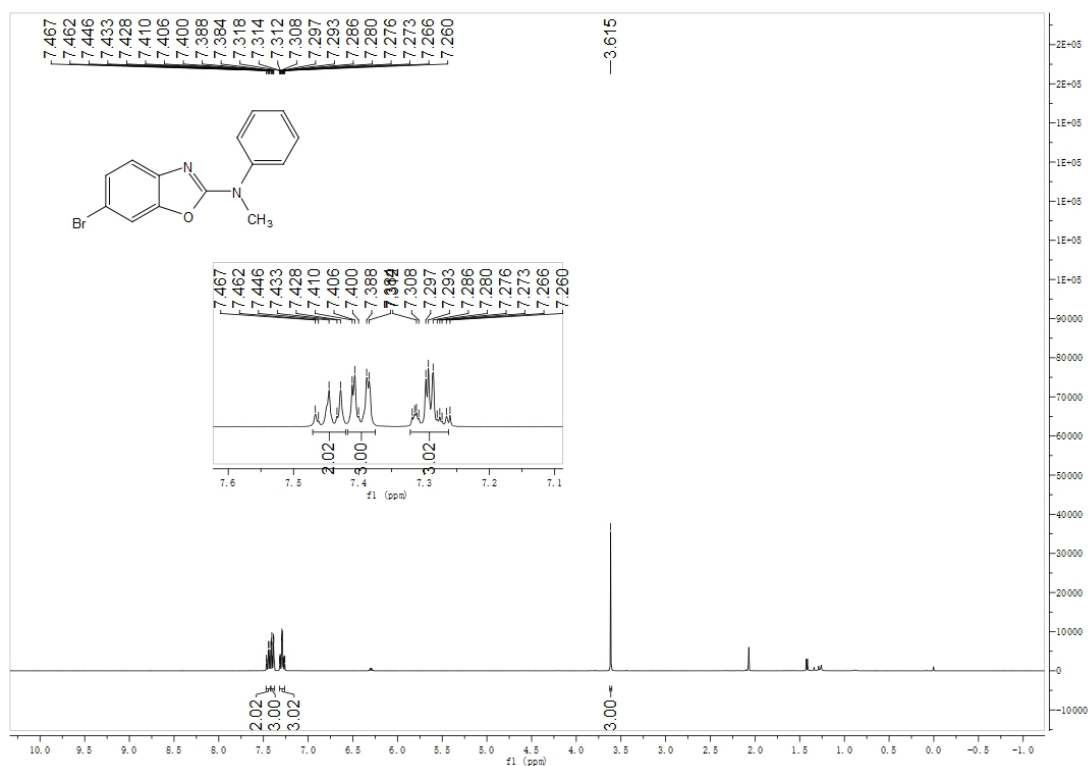

Figure S59. <sup>1</sup>H NMR Spectrum of 4g (400 MHz, CDCl<sub>3</sub>)

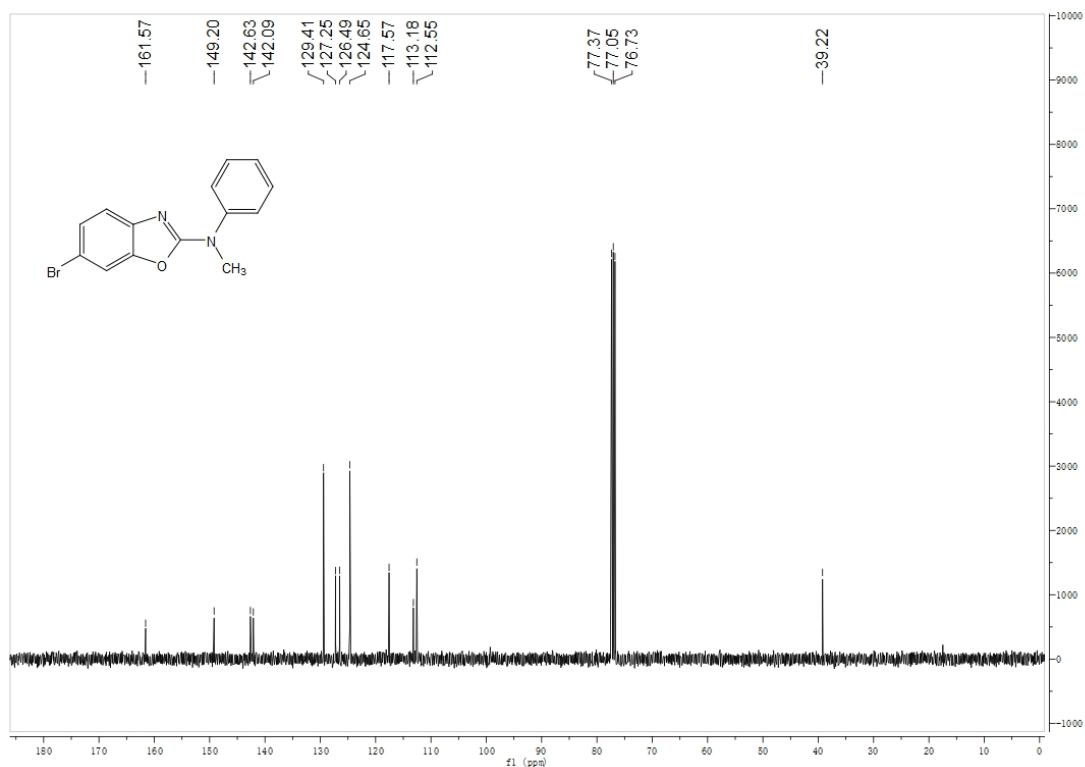

Figure S60. <sup>13</sup>C NMR Spectrum of 4g (100 MHz, CDCl<sub>3</sub>)

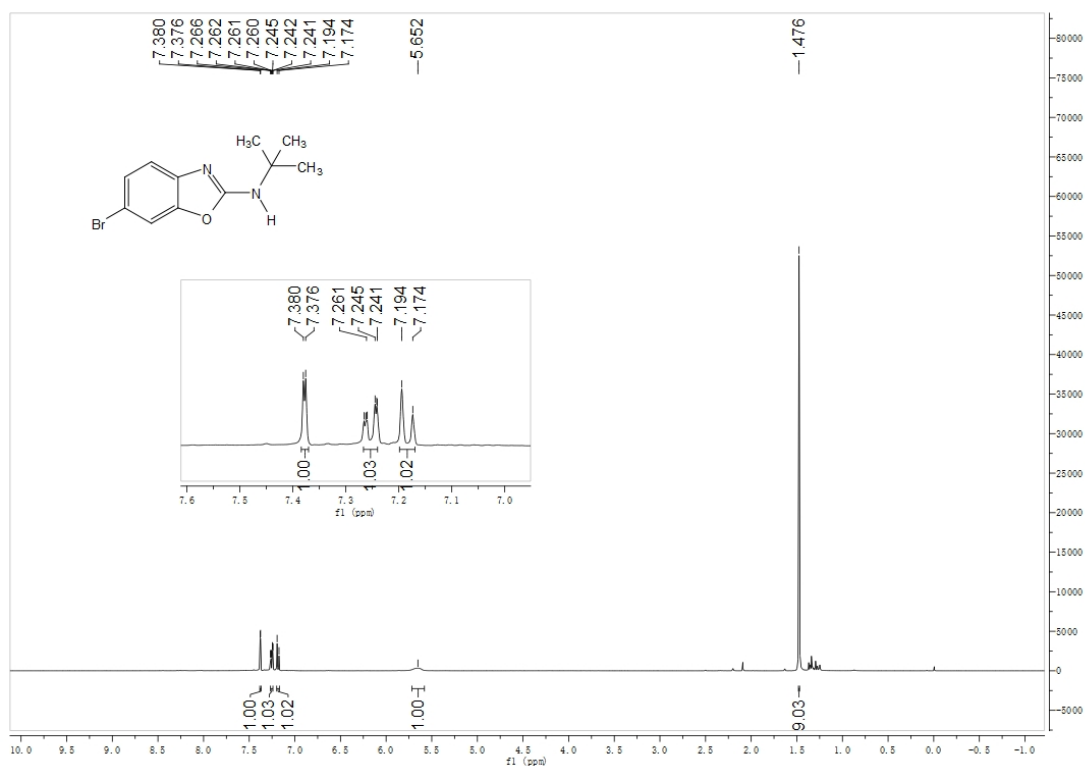

Figure S61. <sup>1</sup>H NMR Spectrum of 4h (400 MHz, CDCl<sub>3</sub>)

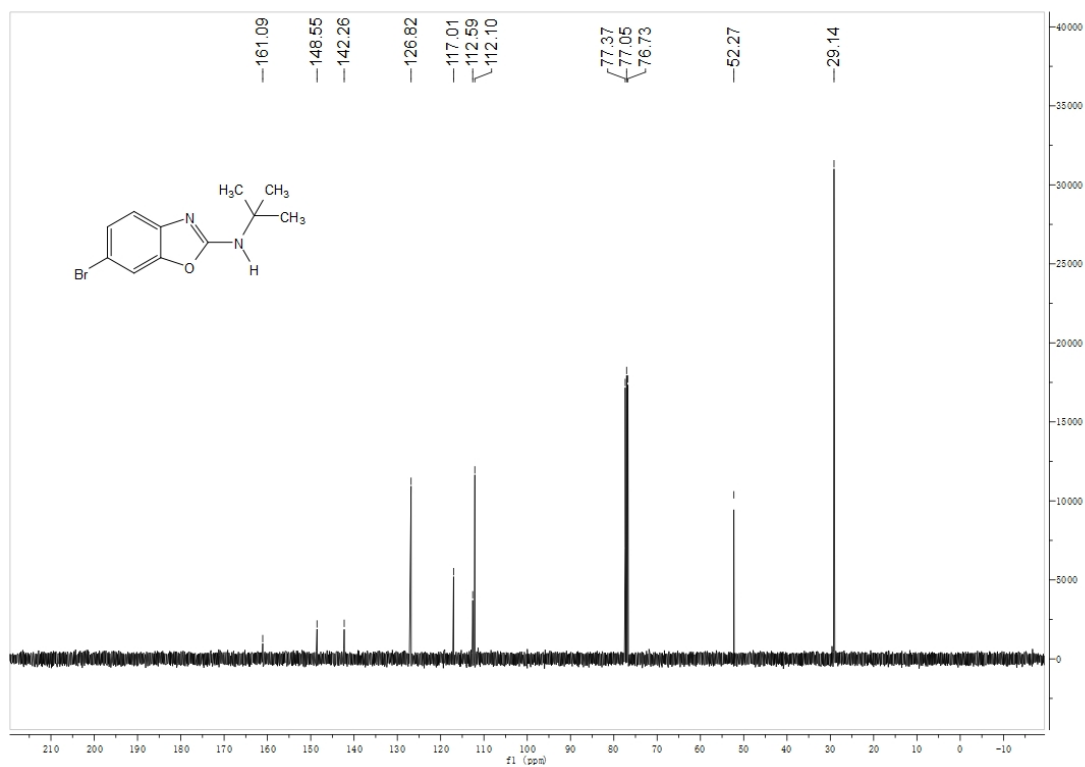

Figure S62. <sup>13</sup>C NMR Spectrum of 4h (100 MHz, CDCl<sub>3</sub>)

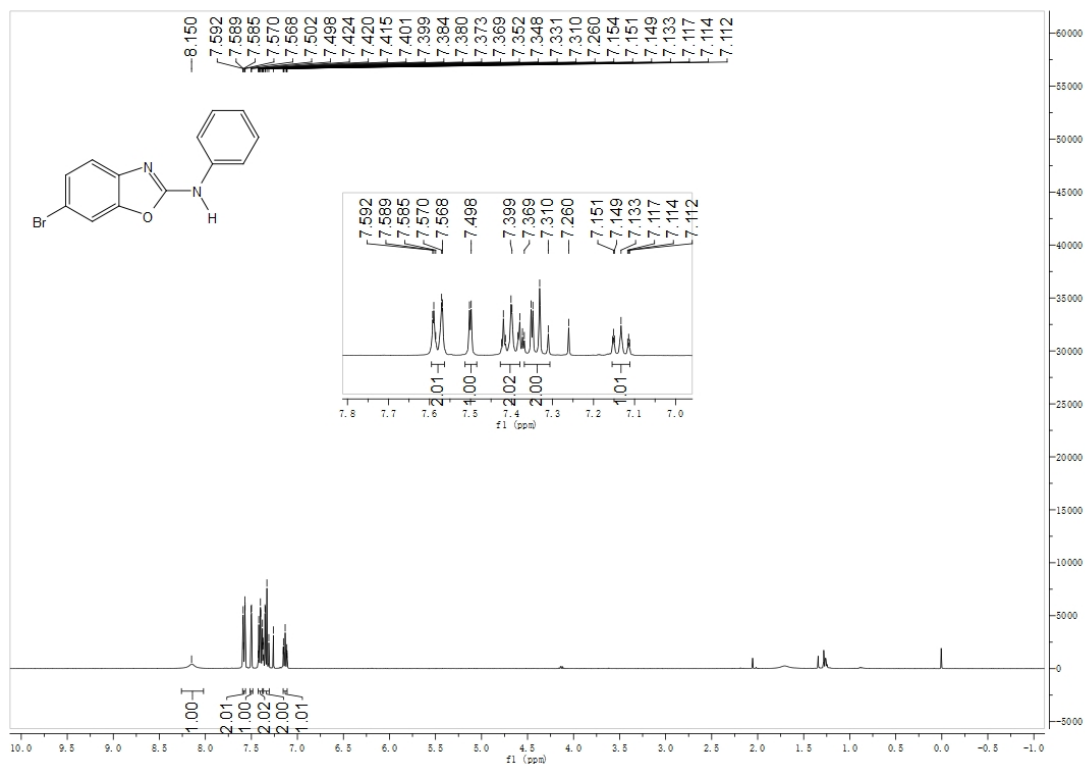

Figure S63. <sup>1</sup>H NMR Spectrum of 4i (400 MHz, CDCl<sub>3</sub>)

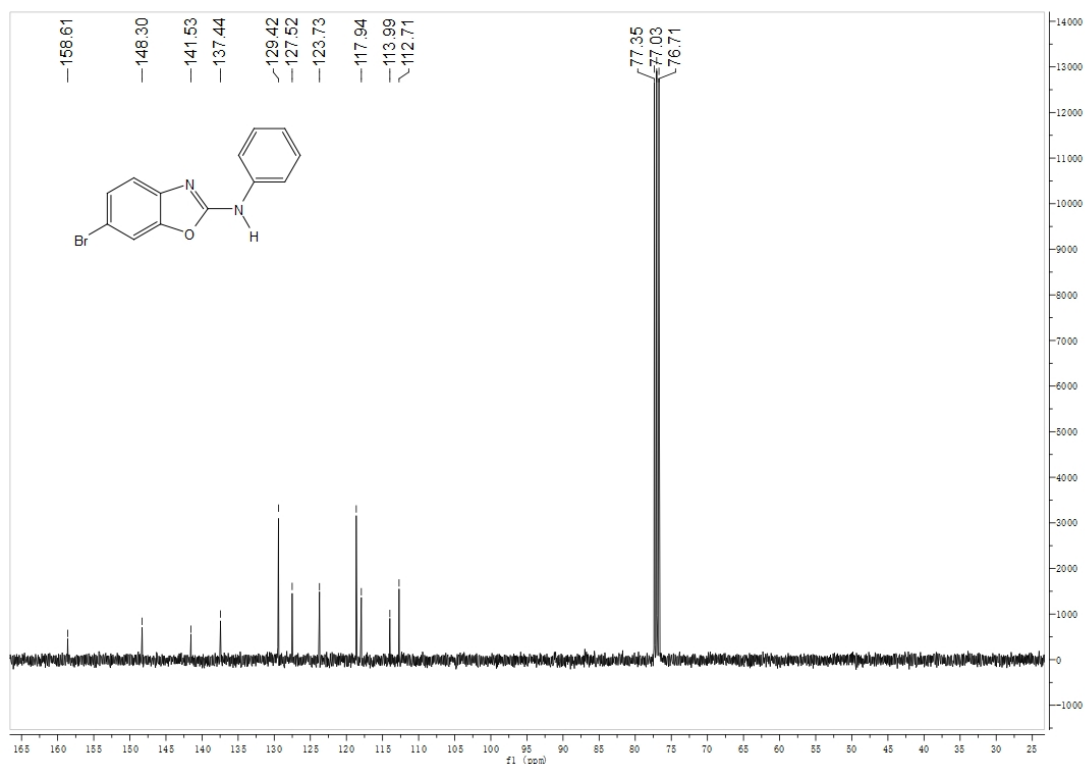

Figure S64. <sup>13</sup>C NMR Spectrum of 4i (100 MHz, CDCl<sub>3</sub>)

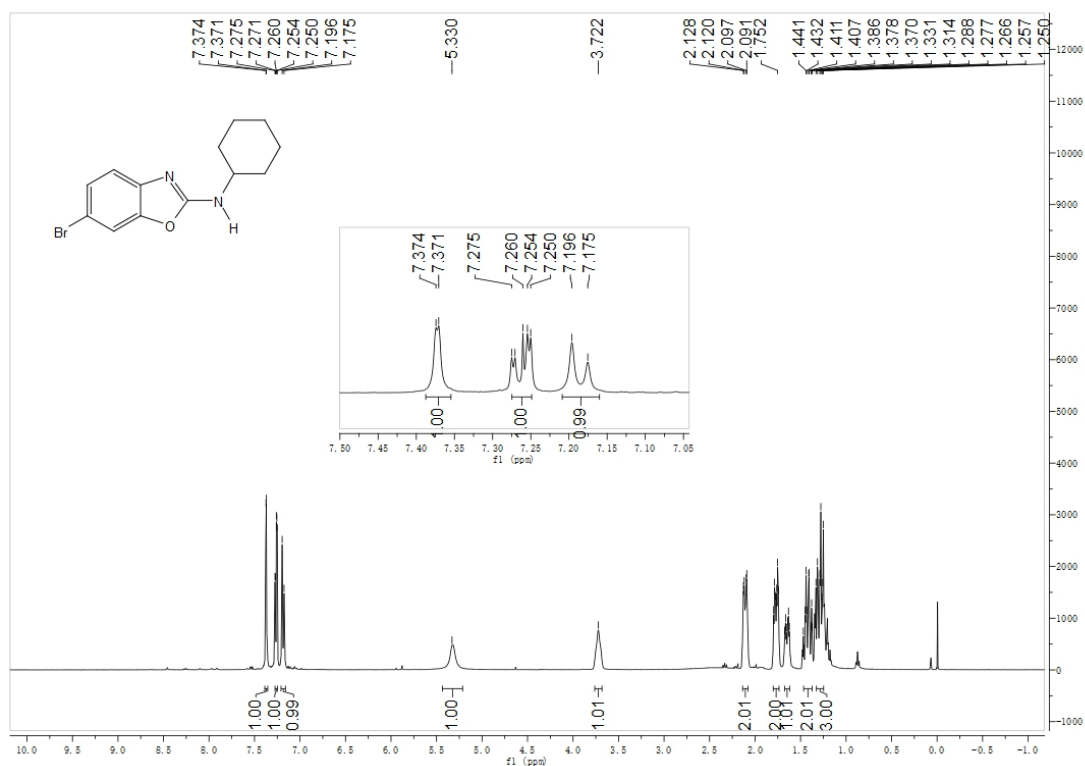

Figure S65. <sup>1</sup>H NMR Spectrum of 4j (400 MHz, CDCl<sub>3</sub>)

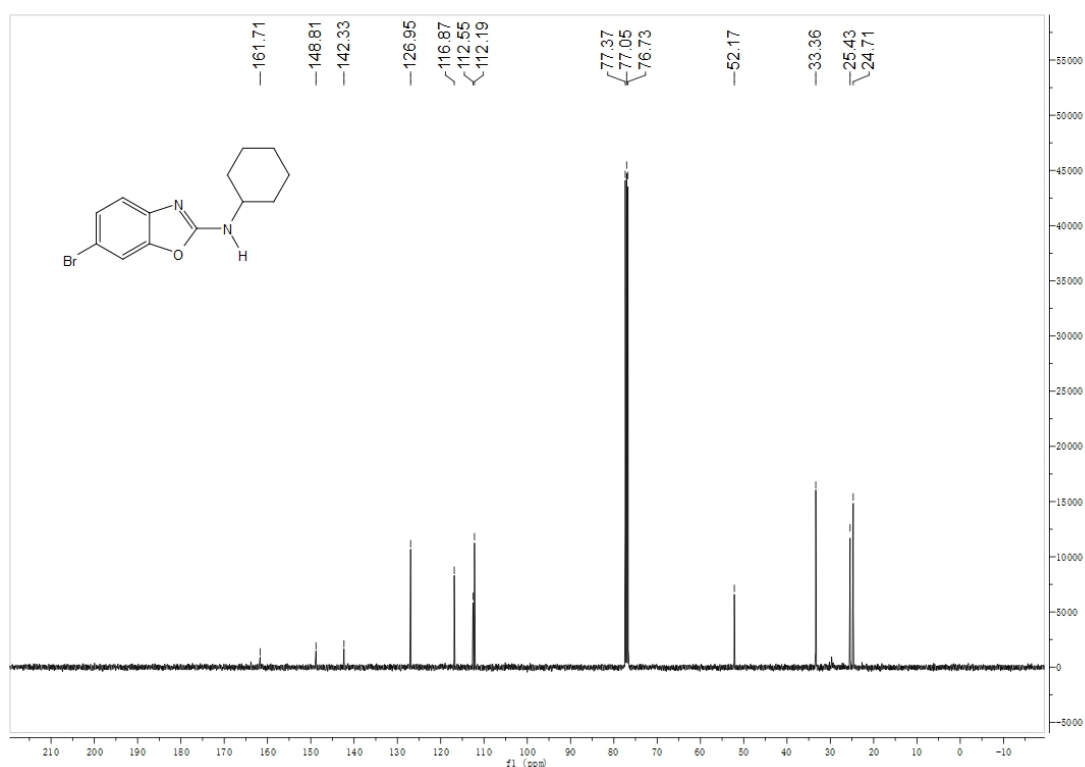

Figure S66. <sup>13</sup>C NMR Spectrum of 4j (100 MHz, CDCl<sub>3</sub>)

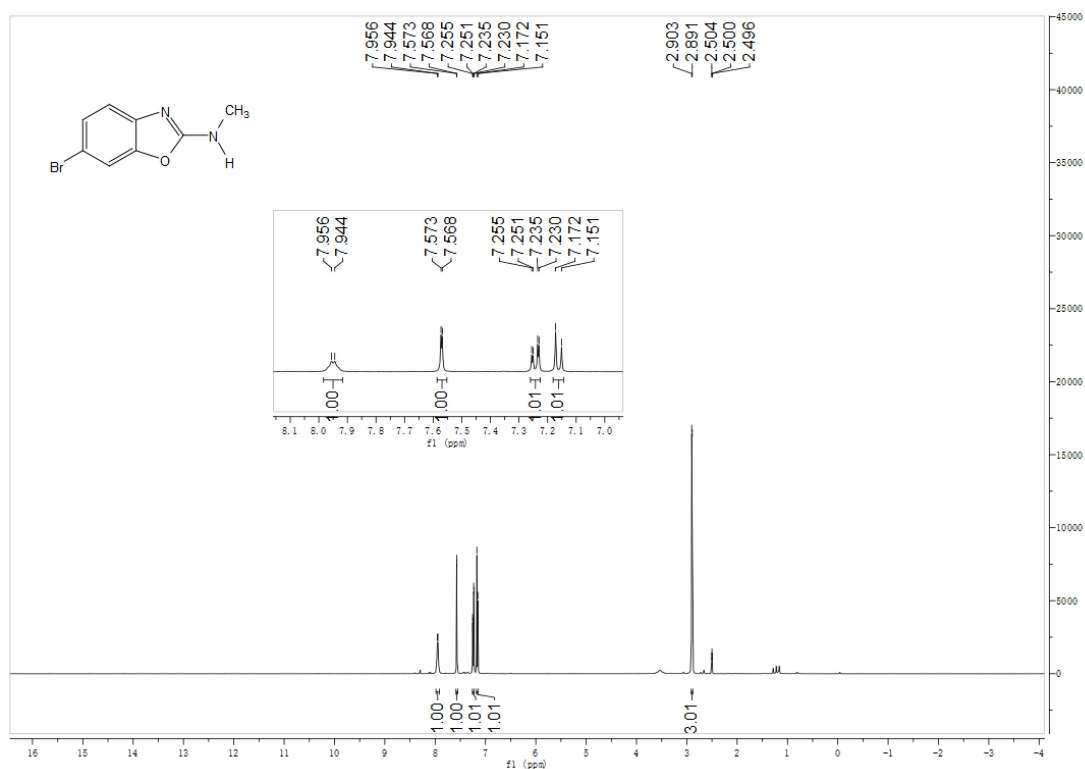

Figure S67. <sup>1</sup>H NMR Spectrum of 4k (400 MHz, DMSO-*d*<sub>6</sub>)

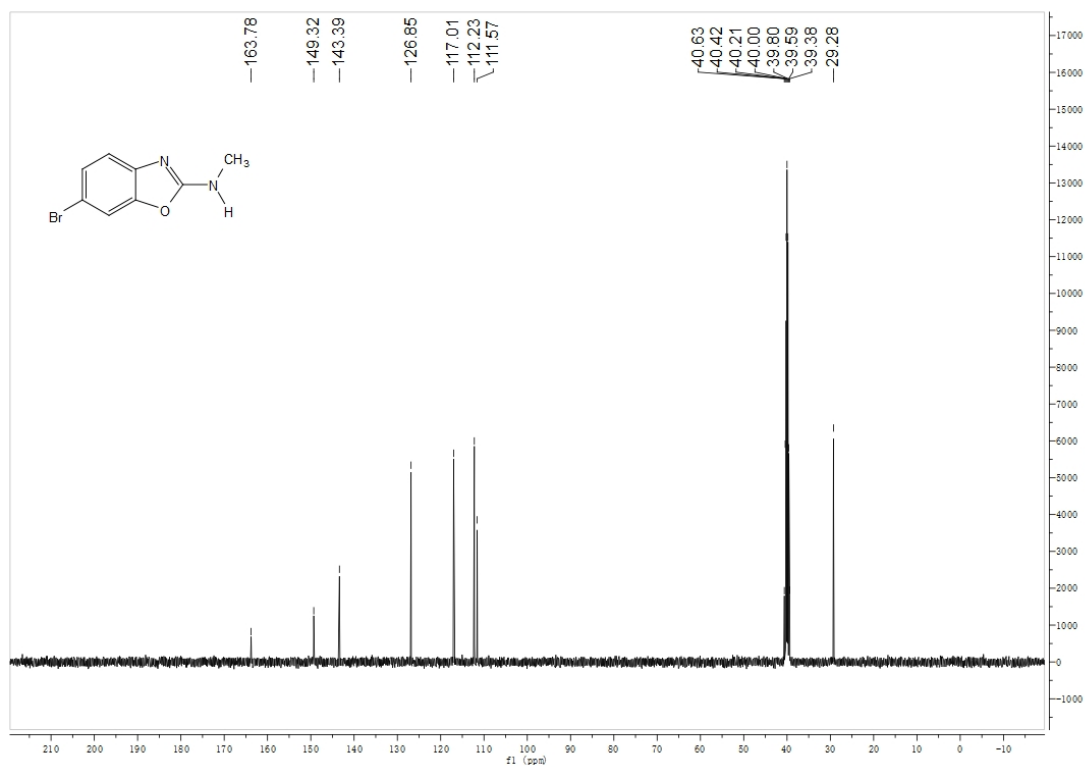

Figure S68. <sup>13</sup>C NMR Spectrum of 4k (100 MHz, DMSO-*d*<sub>6</sub>)



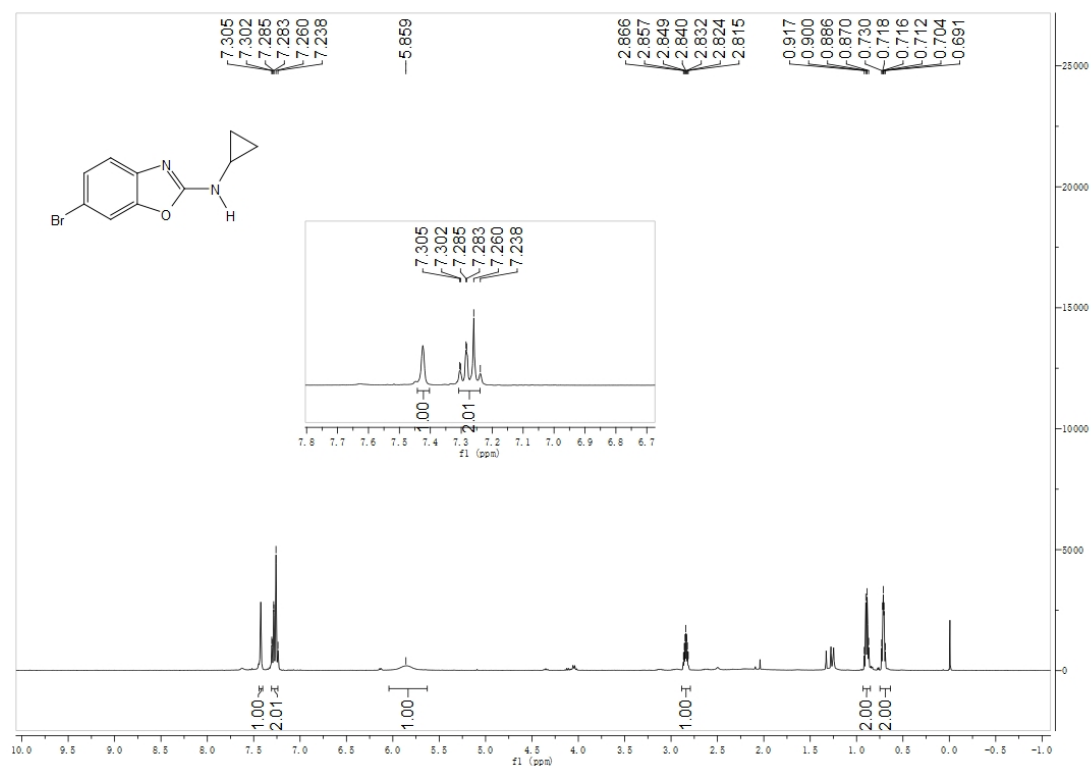

Figure S69. <sup>1</sup>H NMR Spectrum of 4l (400 MHz, CDCl<sub>3</sub>)

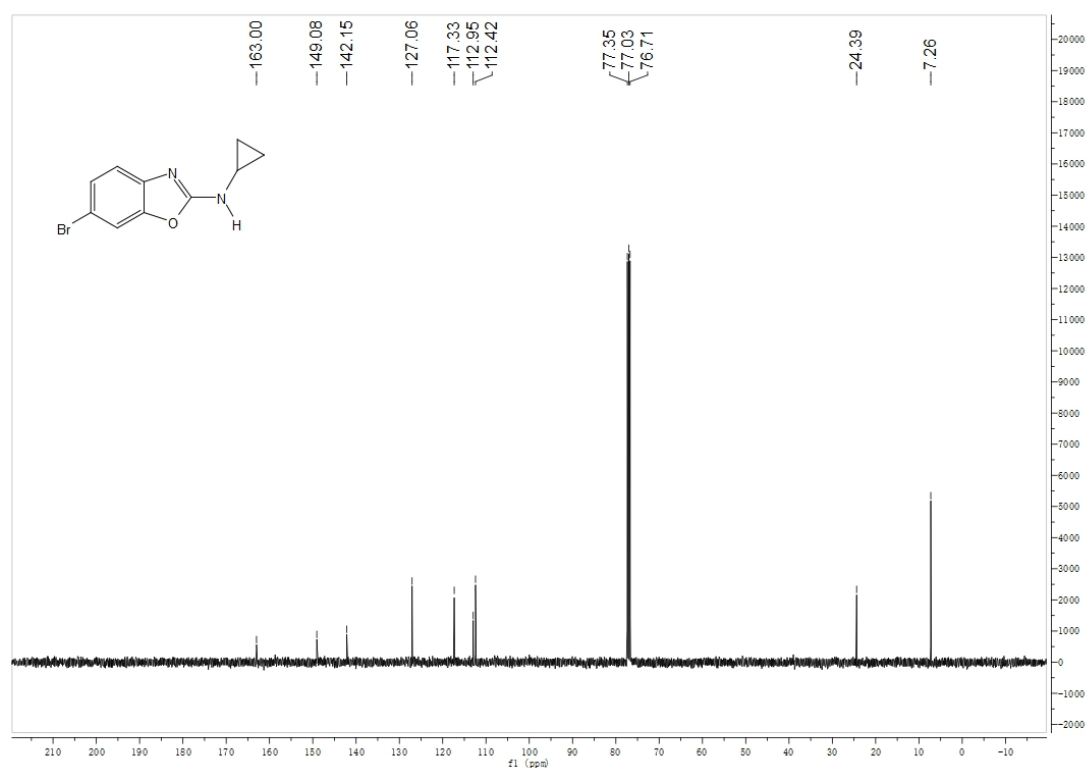

Figure S70. <sup>13</sup>C NMR Spectrum of 4l (100 MHz, CDCl<sub>3</sub>)

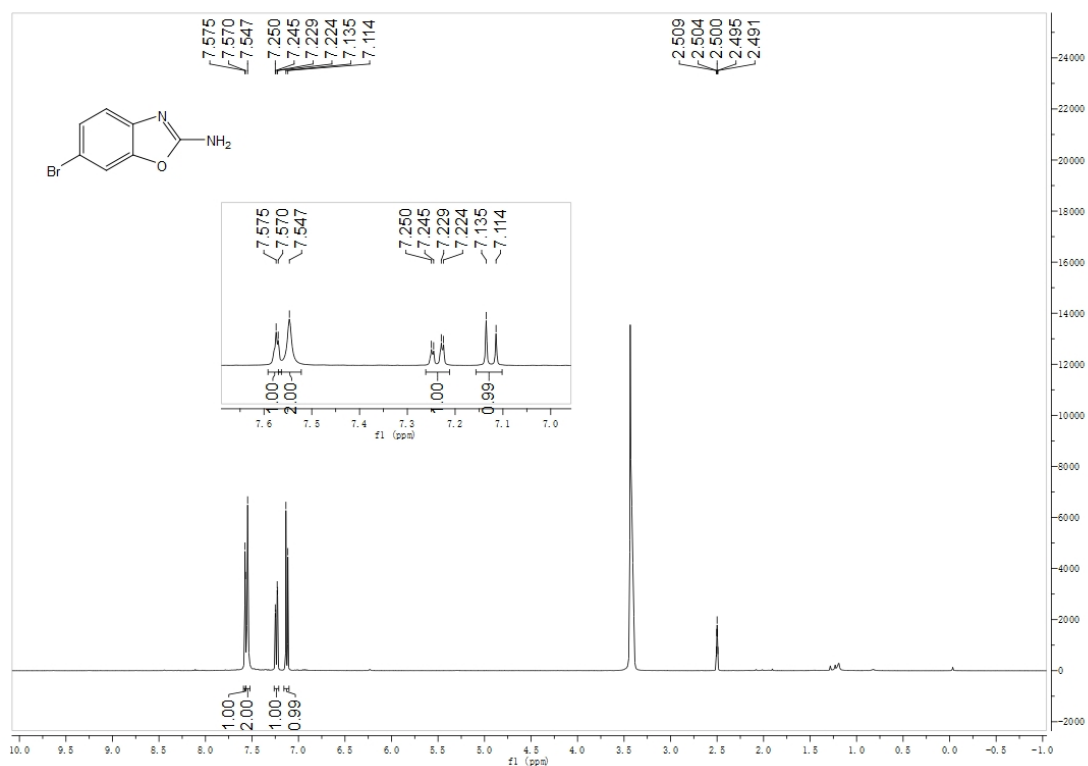

Figure S71. <sup>1</sup>H NMR Spectrum of 4m (400 MHz, DMSO-*d*<sub>6</sub>)

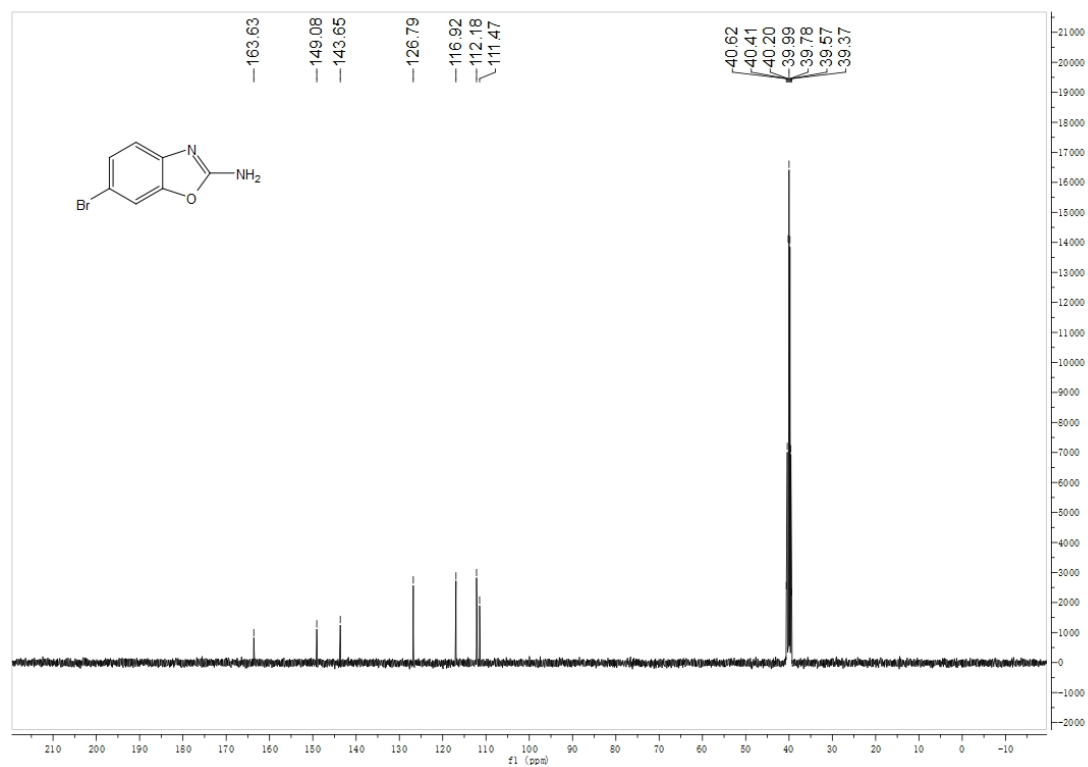

Figure S72. <sup>13</sup>C NMR Spectrum of 4m (100 MHz, DMSO-*d*<sub>6</sub>)

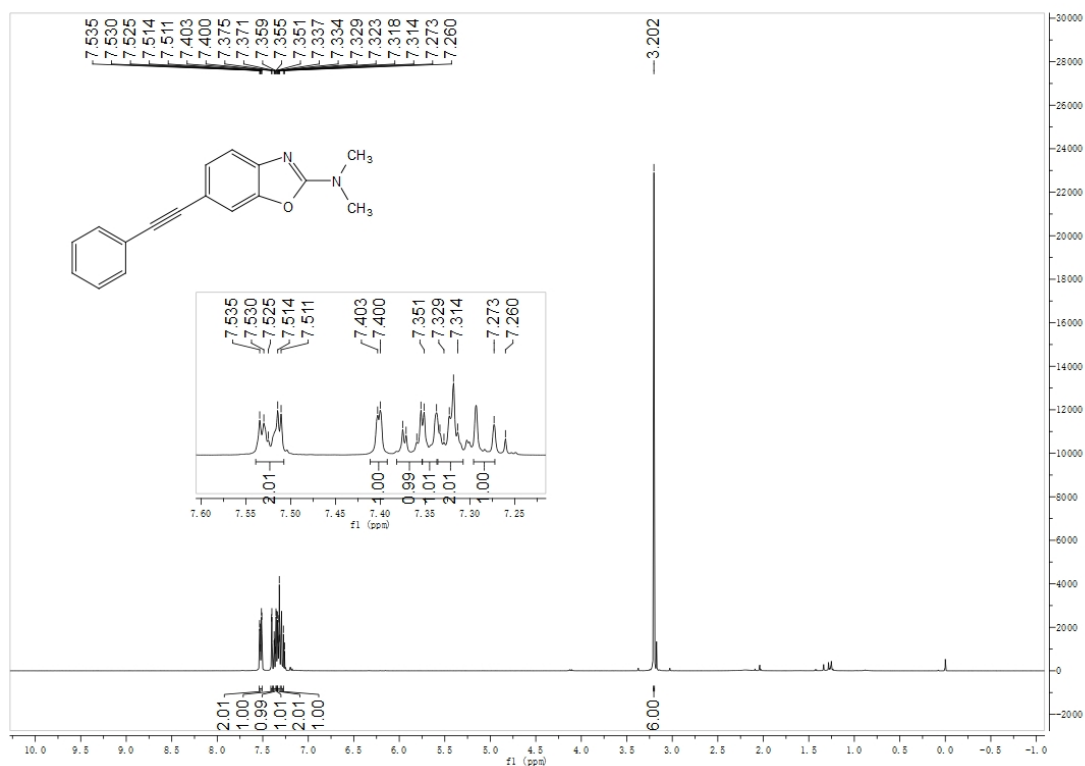

**Figure S73.  $^1\text{H}$  NMR Spectrum of 5 (400 MHz,  $\text{CDCl}_3$ )**

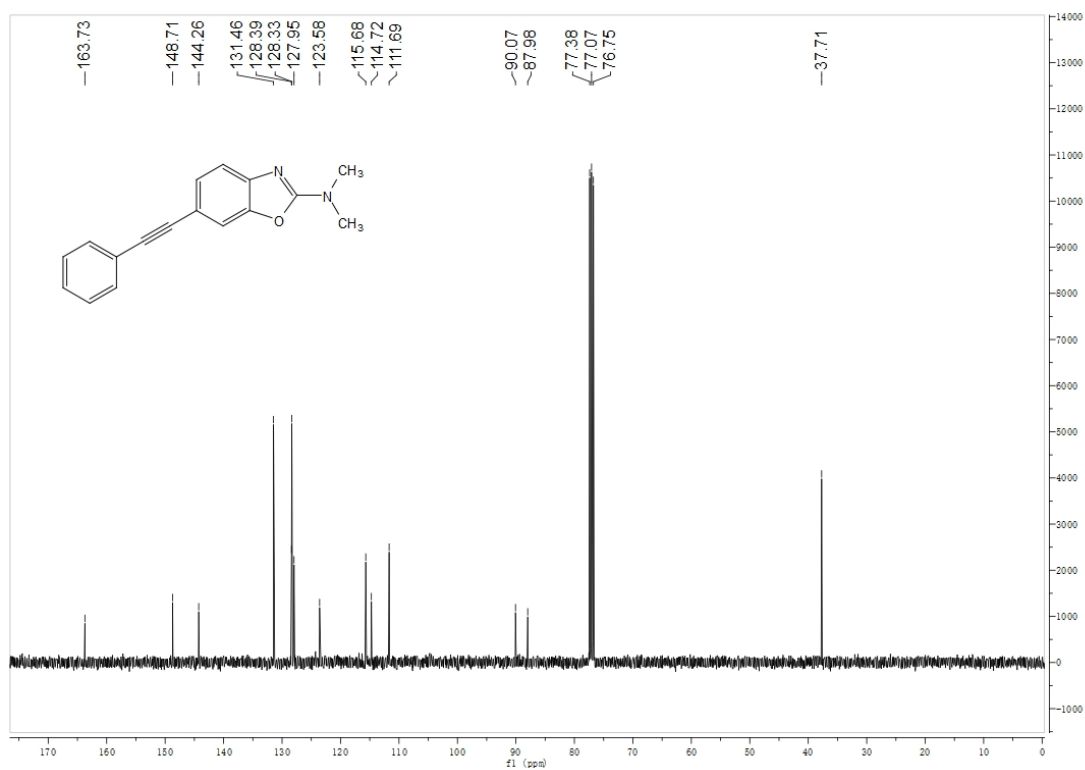

**Figure S74.  $^{13}\text{C}$  NMR Spectrum of 5 (100 MHz,  $\text{CDCl}_3$ )**

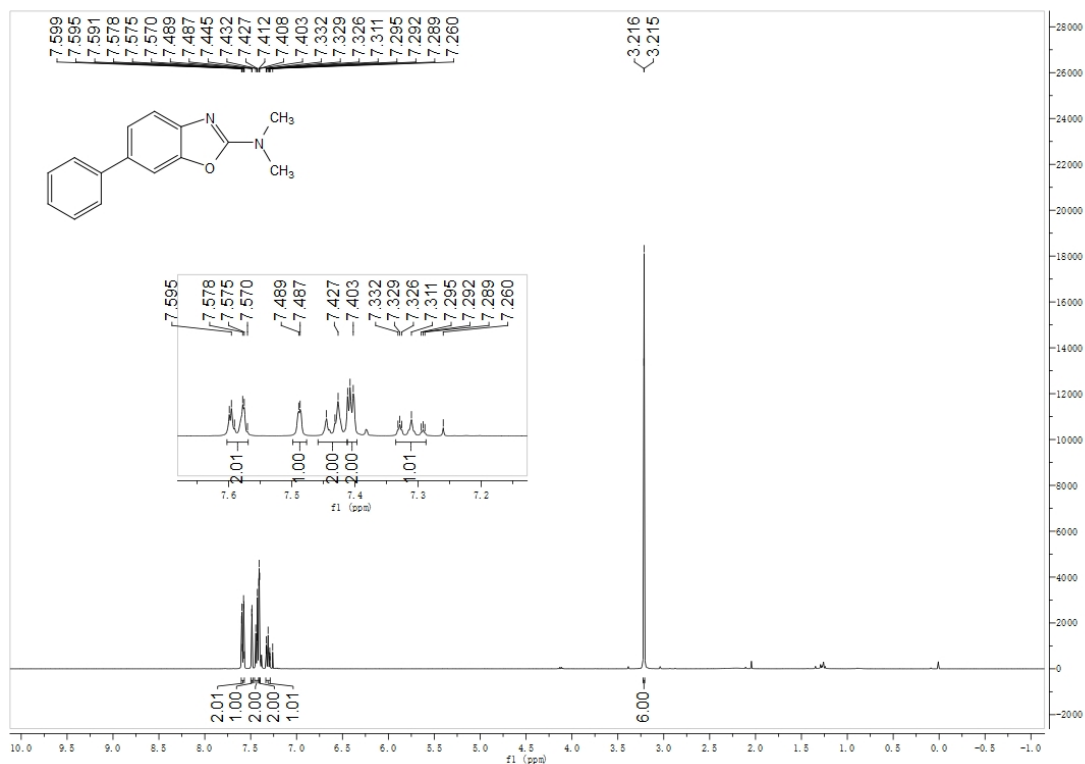

Figure S75. <sup>1</sup>H NMR Spectrum of 6 (400 MHz, CDCl<sub>3</sub>)

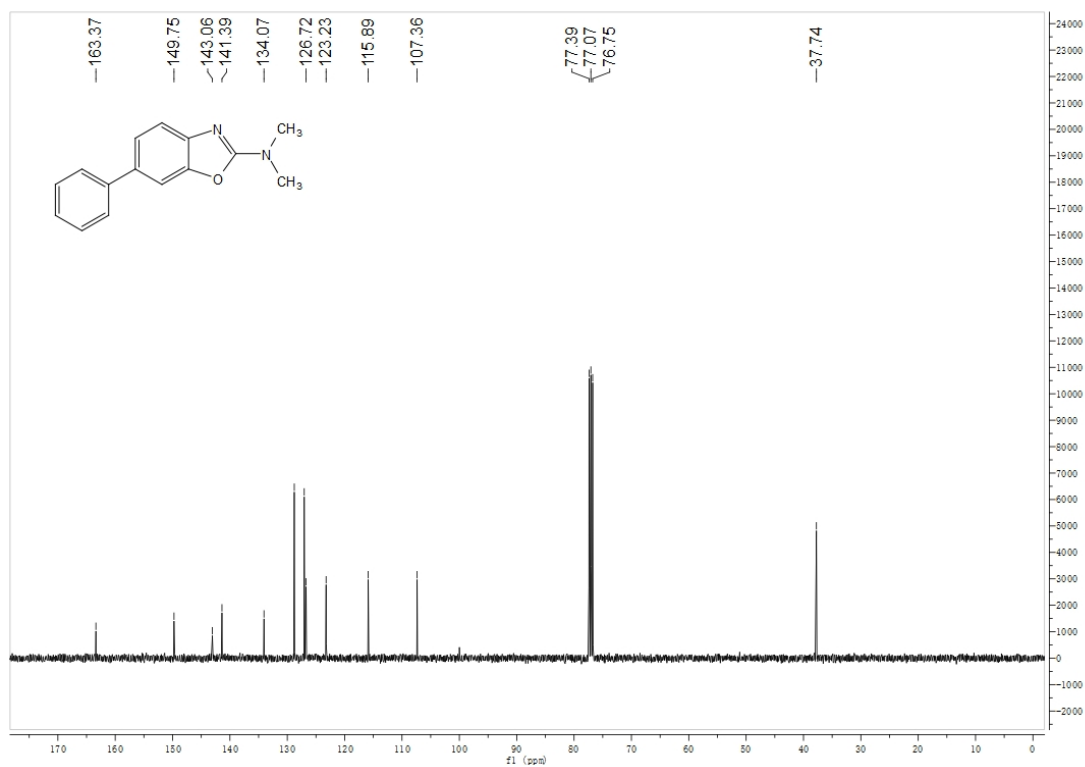

Figure S76. <sup>13</sup>C NMR Spectrum of 6 (100 MHz, CDCl<sub>3</sub>)

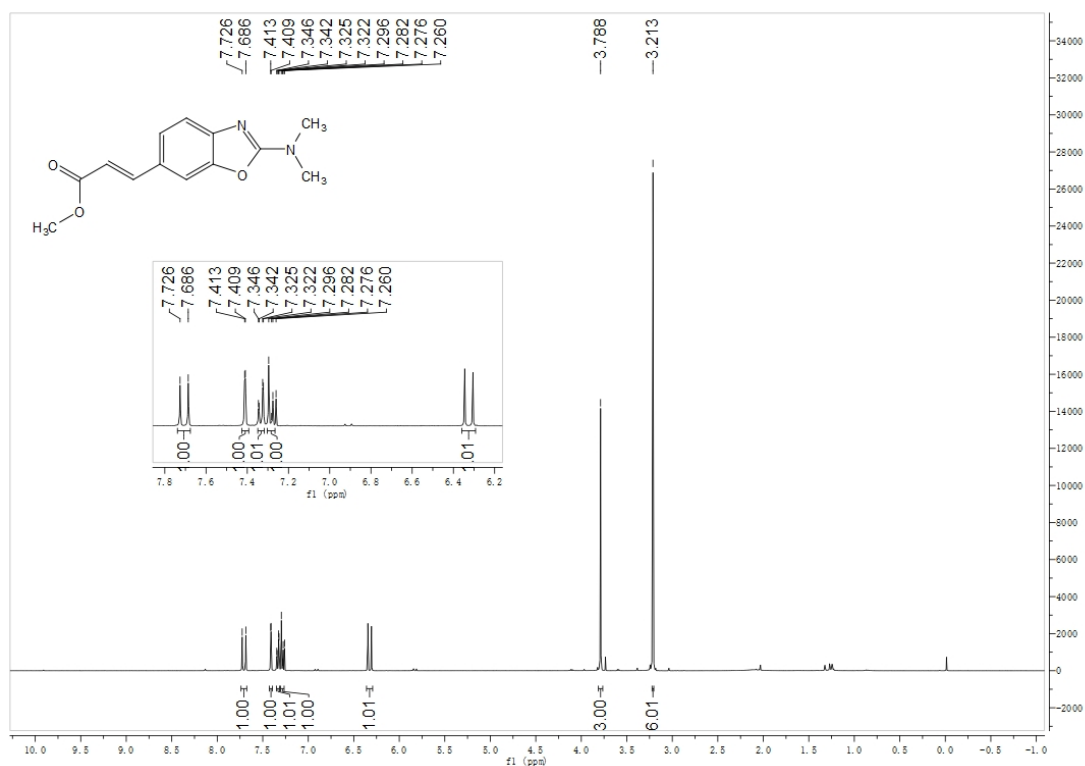

Figure S77. <sup>1</sup>H NMR Spectrum of 7 (400 MHz, CDCl<sub>3</sub>)

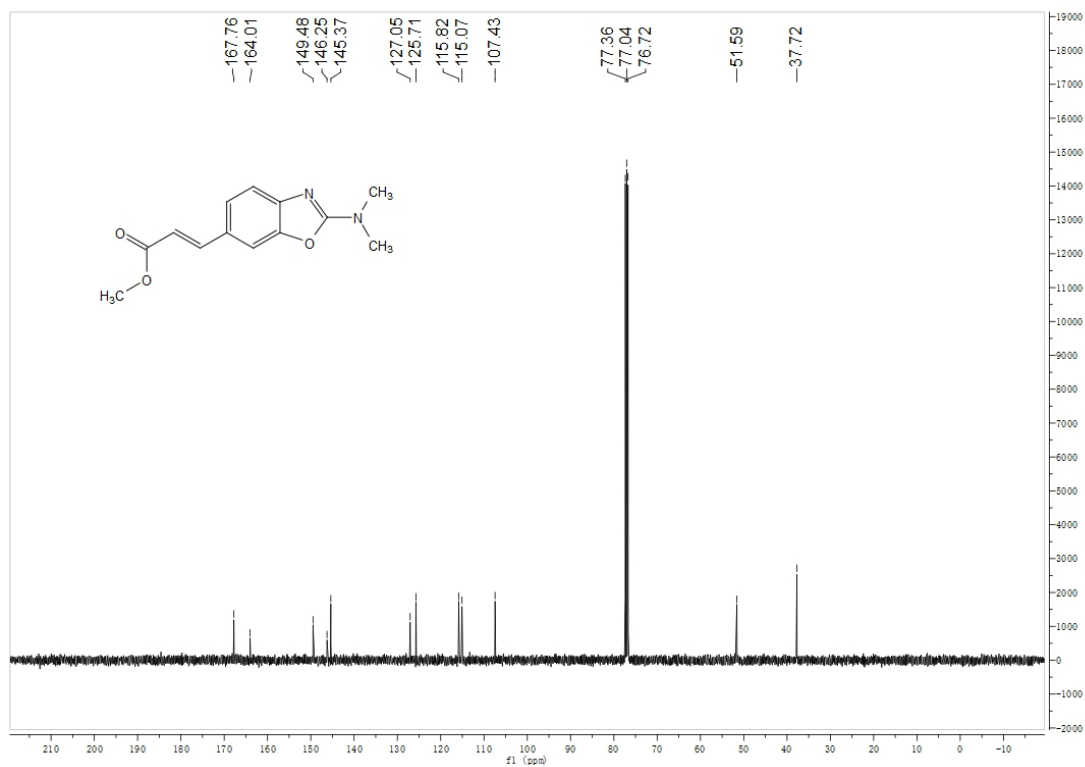

Figure S78. <sup>13</sup>C NMR Spectrum of 7 (100 MHz, CDCl<sub>3</sub>)

## G. X-ray crystallographic data

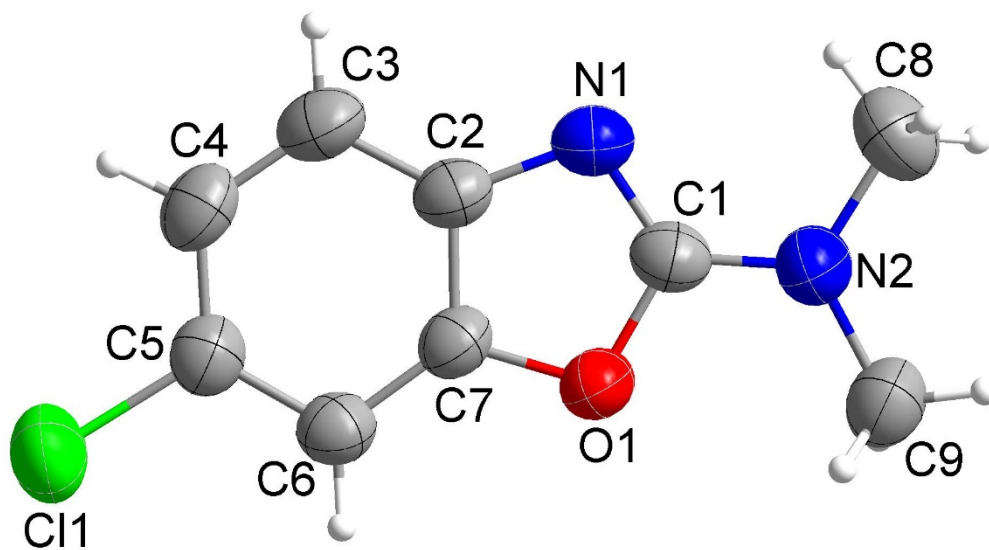

Figure S79. The Diamond diagram of 3c (thermal ellipsoids are shown at 50% probability)

Sample Preparation: A crystalline solid was obtained via slow evaporation of compound **3c** in EA: hexane= 1: 5 at room temperature.

Crystal data and structure refinement for compound **3c** (CCDC: 2132707)

**Table S1 Crystal data and structure refinement for 3c.**

|                                             |                                                               |
|---------------------------------------------|---------------------------------------------------------------|
| Identification code                         | <b>3c</b>                                                     |
| Empirical formula                           | C <sub>9</sub> H <sub>10</sub> ClN <sub>2</sub> O             |
| Formula weight                              | 197.64                                                        |
| Temperature/K                               | 293(2)                                                        |
| Crystal system                              | monoclinic                                                    |
| Space group                                 | P21/c                                                         |
| a/Å                                         | 10.2788(8)                                                    |
| b/Å                                         | 7.8203(7)                                                     |
| c/Å                                         | 12.2421(10)                                                   |
| α/°                                         | 90                                                            |
| β/°                                         | 100.159(8)                                                    |
| γ/°                                         | 90                                                            |
| Volume/Å <sup>3</sup>                       | 968.63(14)                                                    |
| Z                                           | 4                                                             |
| ρ <sub>calc</sub> /cm <sup>3</sup>          | 1.355                                                         |
| μ/mm <sup>-1</sup>                          | 0.355                                                         |
| F(000)                                      | 412.0                                                         |
| Crystal size/mm <sup>3</sup>                | 0.15 × 0.15 × 0.15                                            |
| Radiation                                   | Mo Kα (λ = 0.71073)                                           |
| 2θ range for data collection/°              | 4.026 to 60                                                   |
| Index ranges                                | -13 ≤ h ≤ 14, -10 ≤ k ≤ 10, -17 ≤ l ≤ 16                      |
| Reflections collected                       | 8357                                                          |
| Independent reflections                     | 2667 [R <sub>int</sub> = 0.0702, R <sub>sigma</sub> = 0.0650] |
| Data/restraints/parameters                  | 2667/0/120                                                    |
| Goodness-of-fit on F <sup>2</sup>           | 1.015                                                         |
| Final R indexes [I >= 2σ (I)]               | R <sub>1</sub> = 0.0622, wR <sub>2</sub> = 0.1612             |
| Final R indexes [all data]                  | R <sub>1</sub> = 0.1121, wR <sub>2</sub> = 0.1956             |
| Largest diff. peak/hole / e Å <sup>-3</sup> | 0.25/-0.42                                                    |

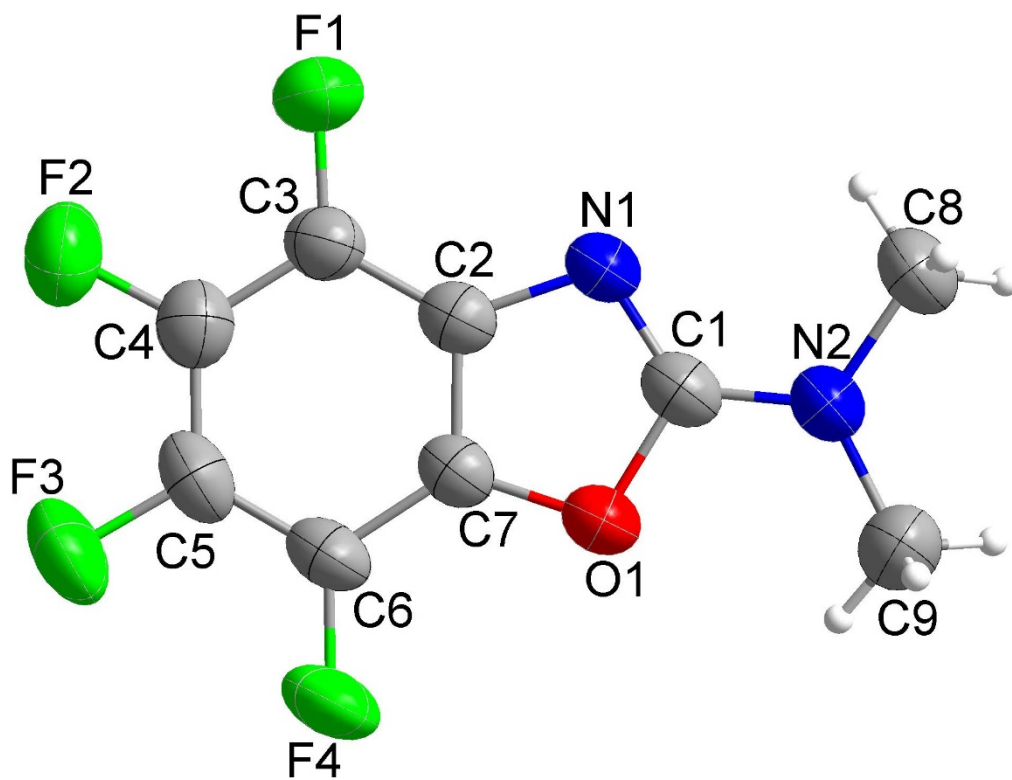

Figure S80. The Diamond diagram of 3x (thermal ellipsoids are shown at 50% probability)



Sample Preparation: A crystalline solid was obtained via slow evaporation of compound **3c** in EA: hexane= 1: 5 at room temperature.

Crystal data and structure refinement for compound **3w** (CCDC: 2131243)

**Table S1 Crystal data and structure refinement for 3w.**

|                                             |                                                               |
|---------------------------------------------|---------------------------------------------------------------|
| Identification code                         | <b>3w</b>                                                     |
| Empirical formula                           | C <sub>9</sub> H <sub>6</sub> F <sub>4</sub> N <sub>2</sub> O |
| Formula weight                              | 234.16                                                        |
| Temperature/K                               | 293(2)                                                        |
| Crystal system                              | triclinic                                                     |
| Space group                                 | P-1                                                           |
| a/Å                                         | 6.2144(4)                                                     |
| b/Å                                         | 8.2329(4)                                                     |
| c/Å                                         | 10.3279(6)                                                    |
| α/°                                         | 70.410(5)                                                     |
| β/°                                         | 72.569(6)                                                     |
| γ/°                                         | 86.651(5)                                                     |
| Volume/Å <sup>3</sup>                       | 474.44(5)                                                     |
| Z                                           | 2                                                             |
| ρ <sub>calc</sub> /cm <sup>3</sup>          | 1.639                                                         |
| μ/mm <sup>-1</sup>                          | 0.162                                                         |
| F(000)                                      | 236.0                                                         |
| Crystal size/mm <sup>3</sup>                | 0.15 × 0.14 × 0.13                                            |
| Radiation                                   | MoKα (λ = 0.71073)                                            |
| 2θ range for data collection/°              | 4.384 to 52.986                                               |
| Index ranges                                | -7 ≤ h ≤ 7, -10 ≤ k ≤ 10, -12 ≤ l ≤ 12                        |
| Reflections collected                       | 6312                                                          |
| Independent reflections                     | 1934 [R <sub>int</sub> = 0.0236, R <sub>sigma</sub> = 0.0315] |
| Data/restraints/parameters                  | 1934/0/147                                                    |
| Goodness-of-fit on F <sup>2</sup>           | 1.055                                                         |
| Final R indexes [I >= 2σ (I)]               | R <sub>1</sub> = 0.0488, wR <sub>2</sub> = 0.1287             |
| Final R indexes [all data]                  | R <sub>1</sub> = 0.0851, wR <sub>2</sub> = 0.1503             |
| Largest diff. peak/hole / e Å <sup>-3</sup> | 0.16/-0.24                                                    |
